# Supplementary material for: Towards developing efficient metalloporphyrin-based hybrid photocatalysts for CO2reduction; anab initiostudy
Source: Royal Society of Chemistry journal article supplement (doi:10.1039/d0cp03279d), 2020-01-01
Supplement: d0cp03279d2.zip [file d0cp03279d2.zip]

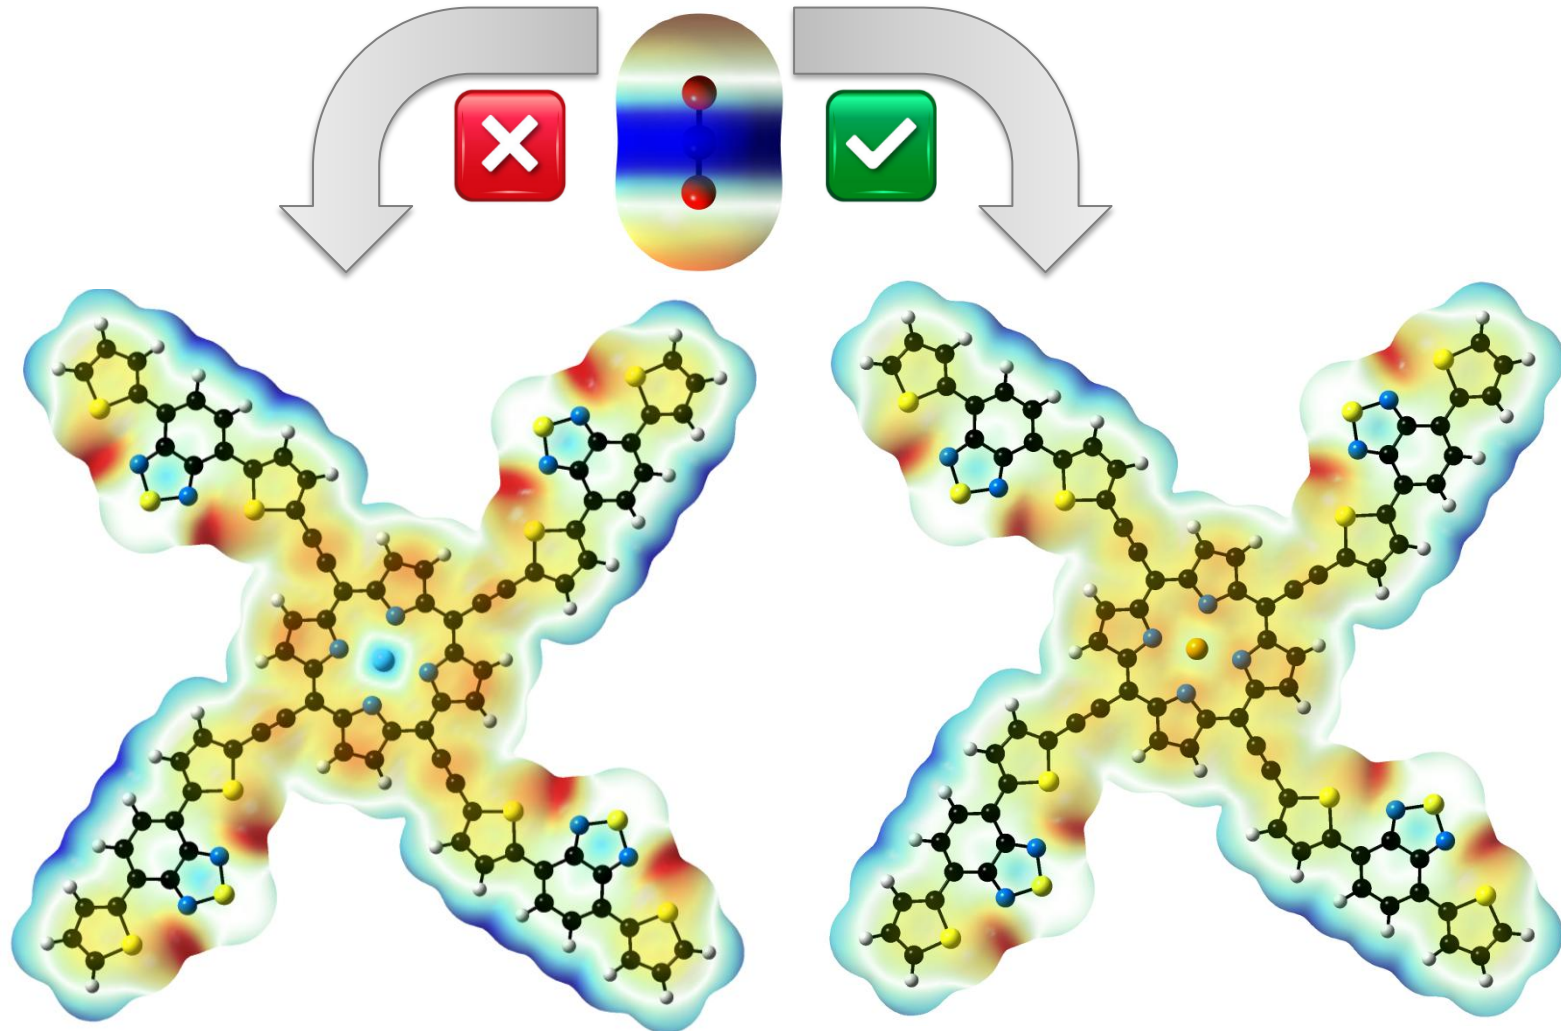

**CoPor(ED)<sub>4</sub>**

**NiPor(ED)<sub>4</sub>**

**ZnPor(ED)<sub>4</sub>**

**CuPor(ED)<sub>4</sub>**

**(a)**

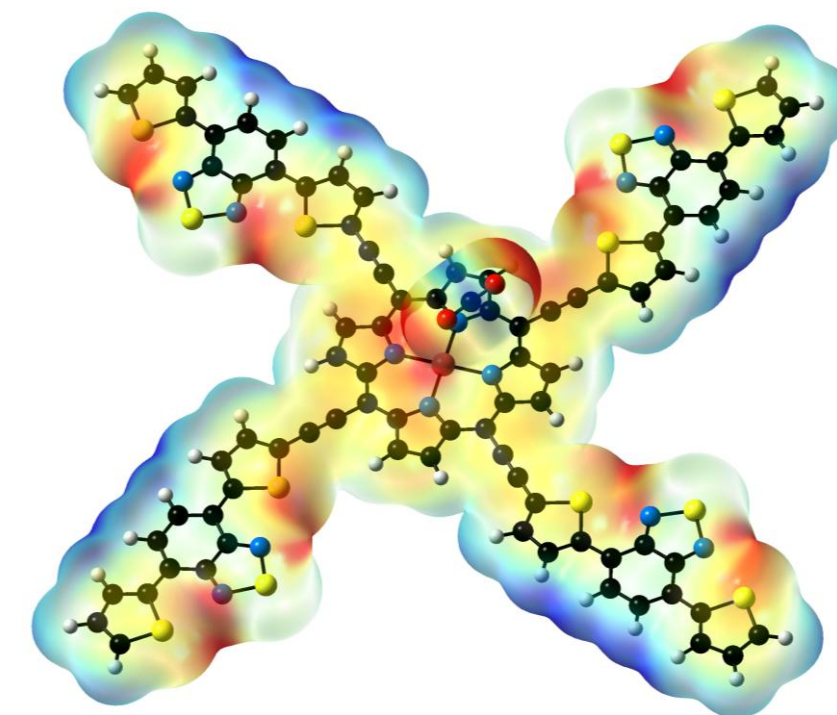

**CoPor(ED)<sub>4</sub>-CO<sub>2</sub>**

**NiPor(ED)<sub>4</sub>-CO<sub>2</sub>**

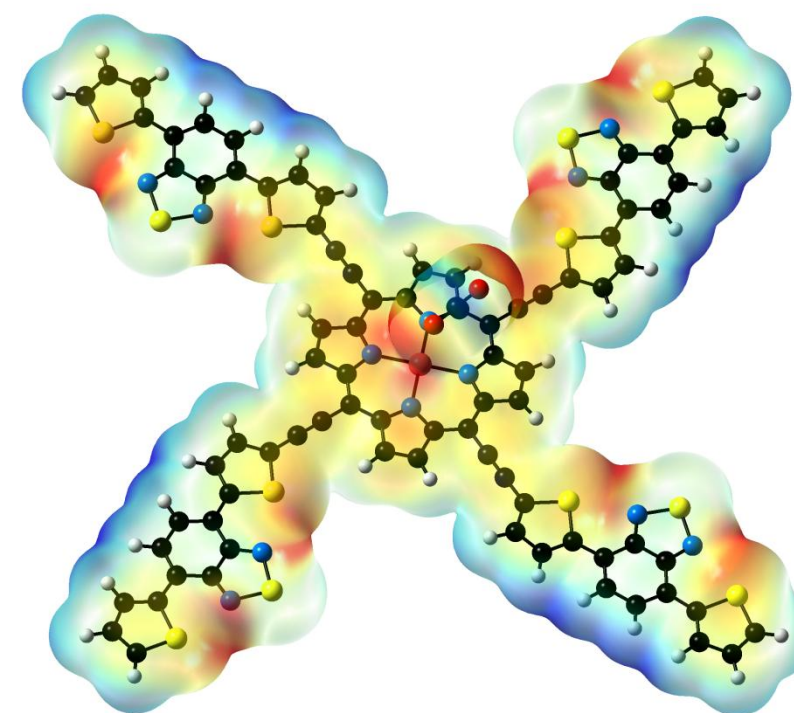

**CuPor(ED)<sub>4</sub>-CO<sub>2</sub>**

**ZnPor(ED)<sub>4</sub>-CO<sub>2</sub>**

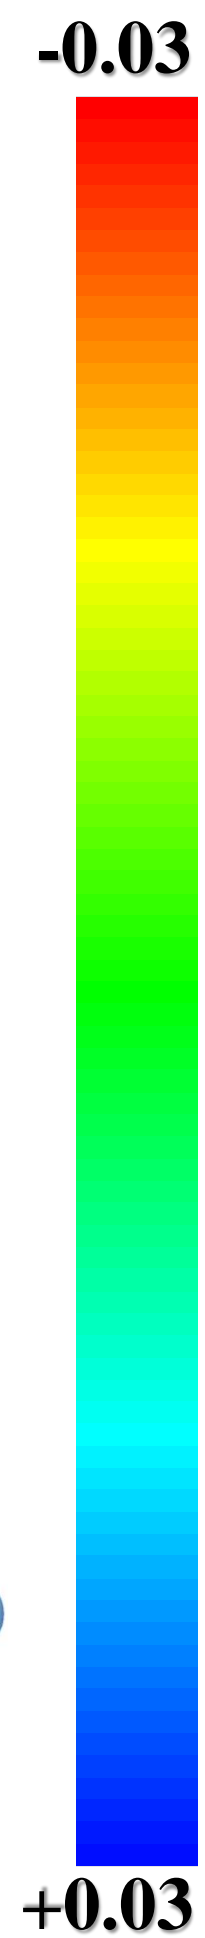

**(b)**
