# Supplementary material for: Towards developing efficient metalloporphyrin-based hybrid photocatalysts for CO2reduction; anab initiostudy
Source: Royal Society of Chemistry journal article supplement (doi:10.1039/d0cp03279d), 2020-01-01
Supplement: d0cp03279d2.zip [file d0cp03279d2.zip]

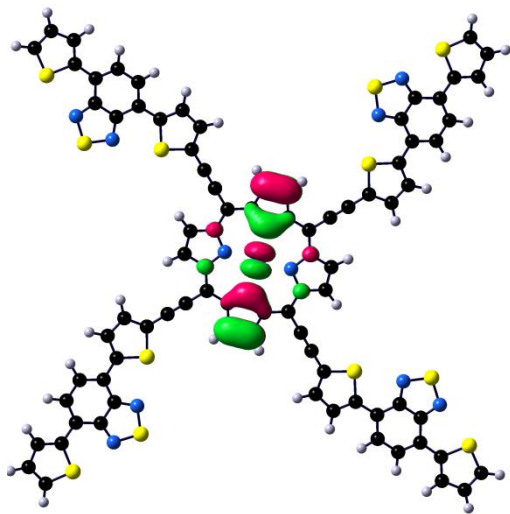

SOMO-6( $\alpha$ ) [HOMO-6( $\alpha$ )]

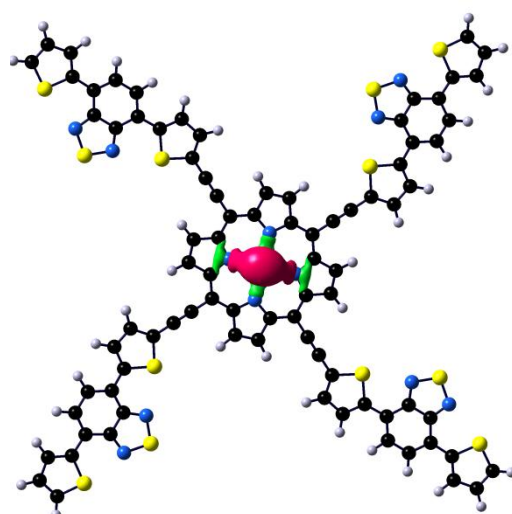

SOMO-7( $\beta$ ) [HOMO-7( $\beta$ )]

(a)

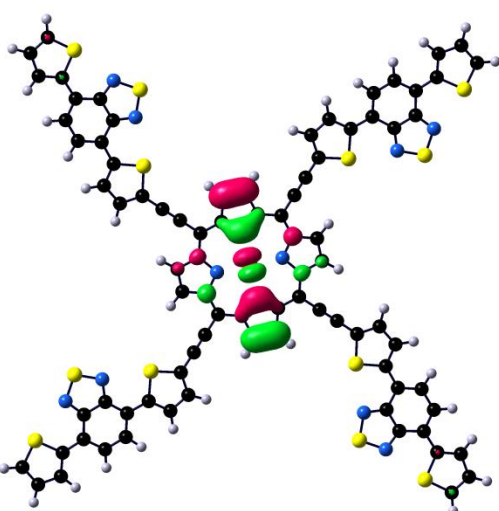

SOMO-6( $\alpha$ ) [HOMO-6( $\alpha$ )]

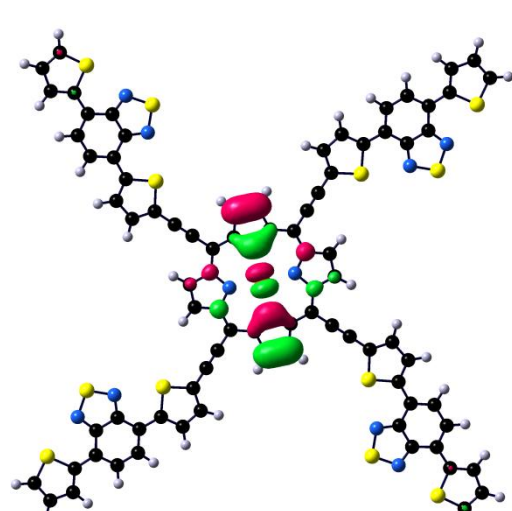

SOMO-6( $\beta$ ) [HOMO-6( $\beta$ )]

(b)

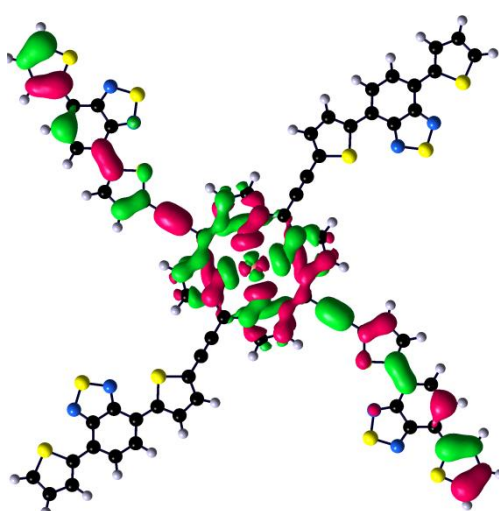

SOMO-6( $\alpha$ ) [HOMO-6( $\alpha$ )]

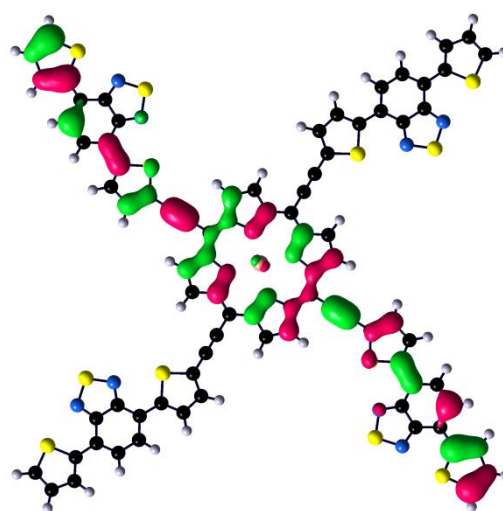

SOMO-7( $\beta$ ) [HOMO-7( $\beta$ )]

(c)

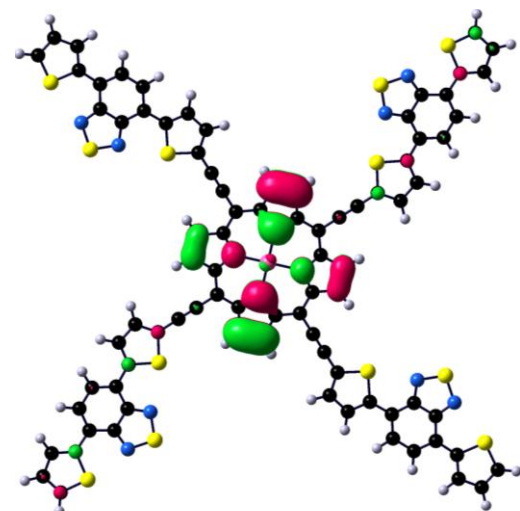

SOMO-11( $\alpha$ ) [HOMO-11( $\alpha$ )]

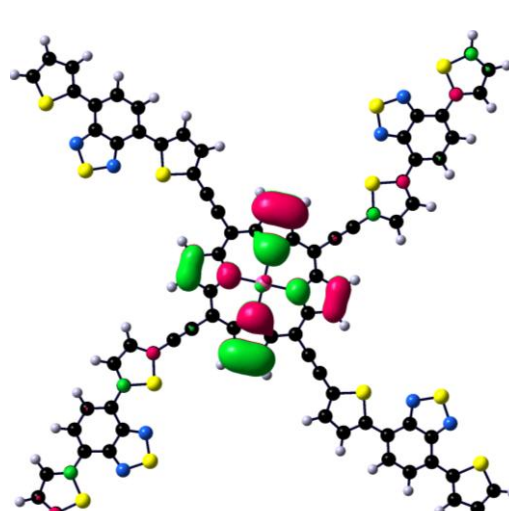

SOMO-11( $\beta$ ) [HOMO-11( $\beta$ )]

(d)
