# Supplementary material for: Towards developing efficient metalloporphyrin-based hybrid photocatalysts for CO2reduction; anab initiostudy
Source: Royal Society of Chemistry journal article supplement (doi:10.1039/d0cp03279d), 2020-01-01
Supplement: d0cp03279d2.zip [file d0cp03279d2.zip]

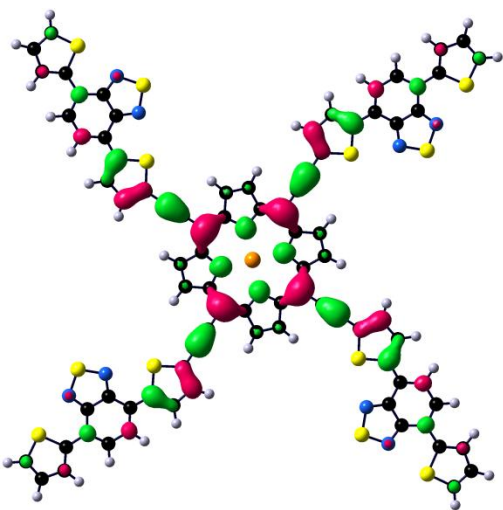

SOMO( $\alpha$ ) [HOMO( $\alpha$ )]

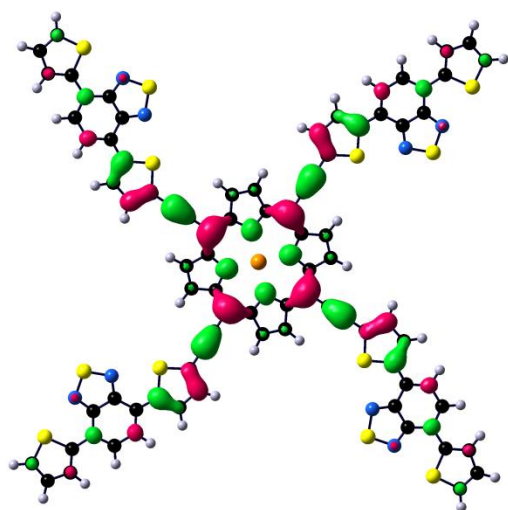

SOMO( $\beta$ ) [HOMO( $\beta$ )]

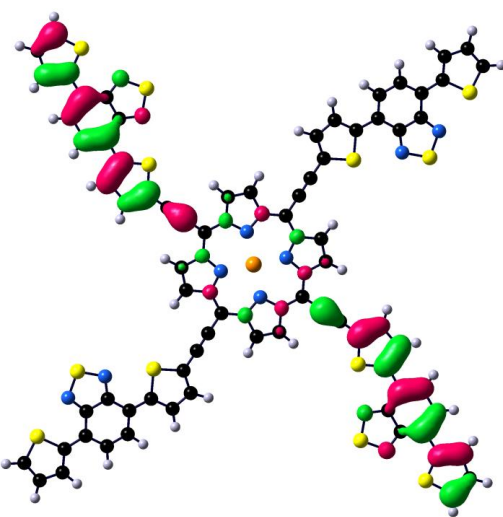

SOMO-1( $\alpha$ ) [HOMO-1( $\alpha$ )]

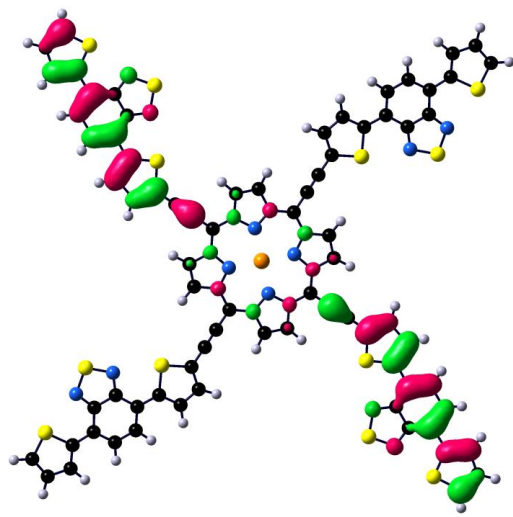

SOMO-1( $\beta$ ) [HOMO-1( $\beta$ )]

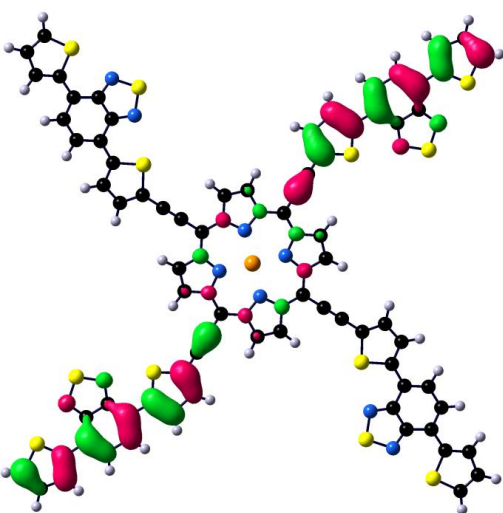

SOMO-2( $\alpha$ ) [HOMO-2( $\alpha$ )]

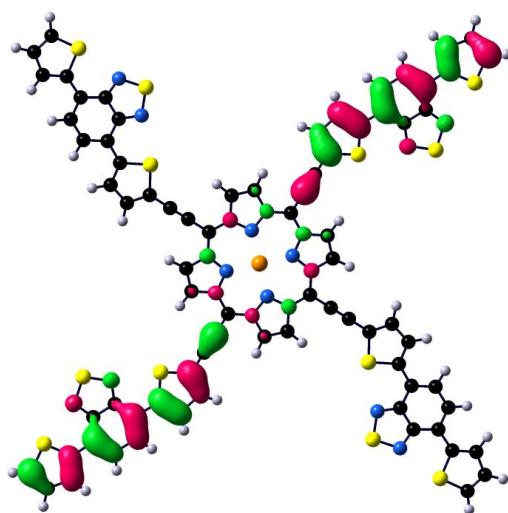

SOMO-2( $\beta$ ) [HOMO-2( $\beta$ )]
