# Supplementary figures and images for: Towards developing efficient metalloporphyrin-based hybrid photocatalysts for CO2reduction; anab initiostudy
Source: Royal Society of Chemistry journal article supplement (doi:10.1039/d0cp03279d), 2020-01-01

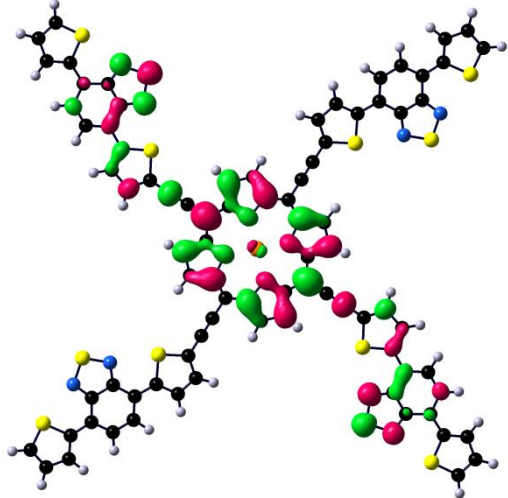

LUMO+5( $\alpha$ )

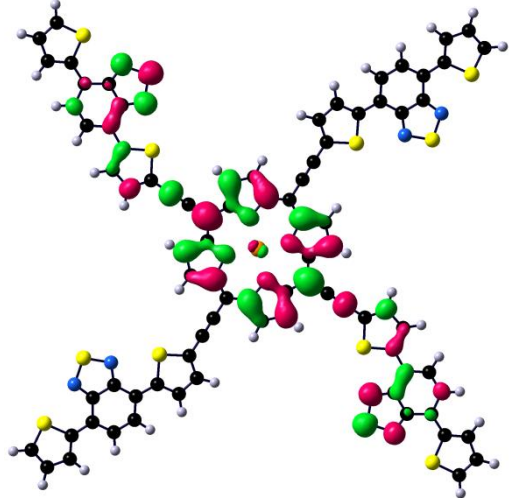

LUMO+5( $\beta$ )

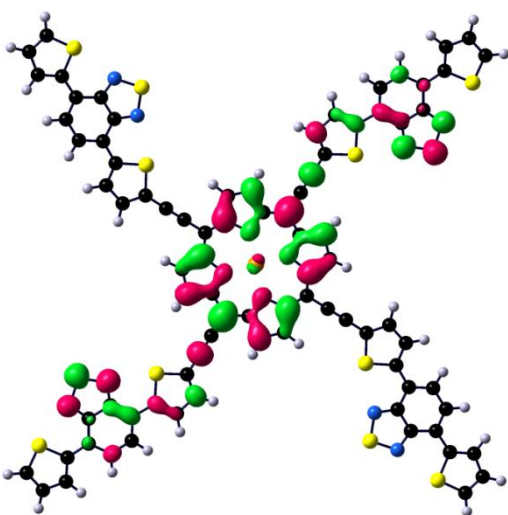

LUMO+4( $\alpha$ )

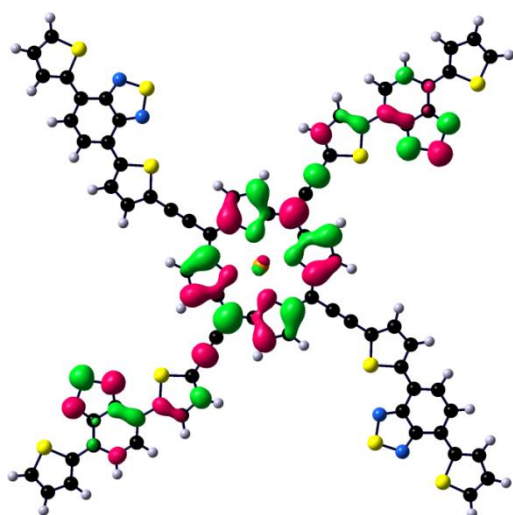

LUMO+4( $\beta$ )

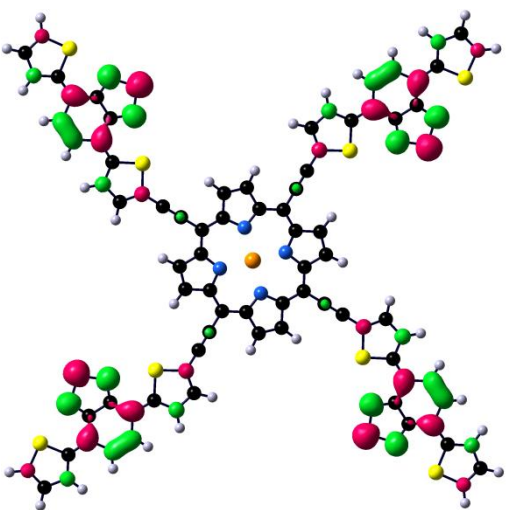

LUMO+3( $\alpha$ )

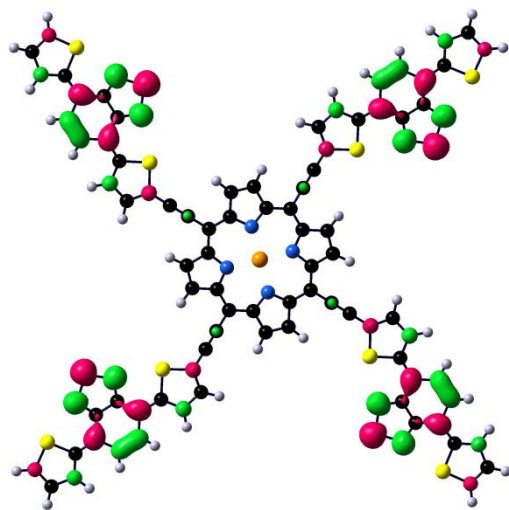

LUMO+3( $\beta$ )

Supplement: d0cp03279d2.zip [file d0cp03279d2.zip]

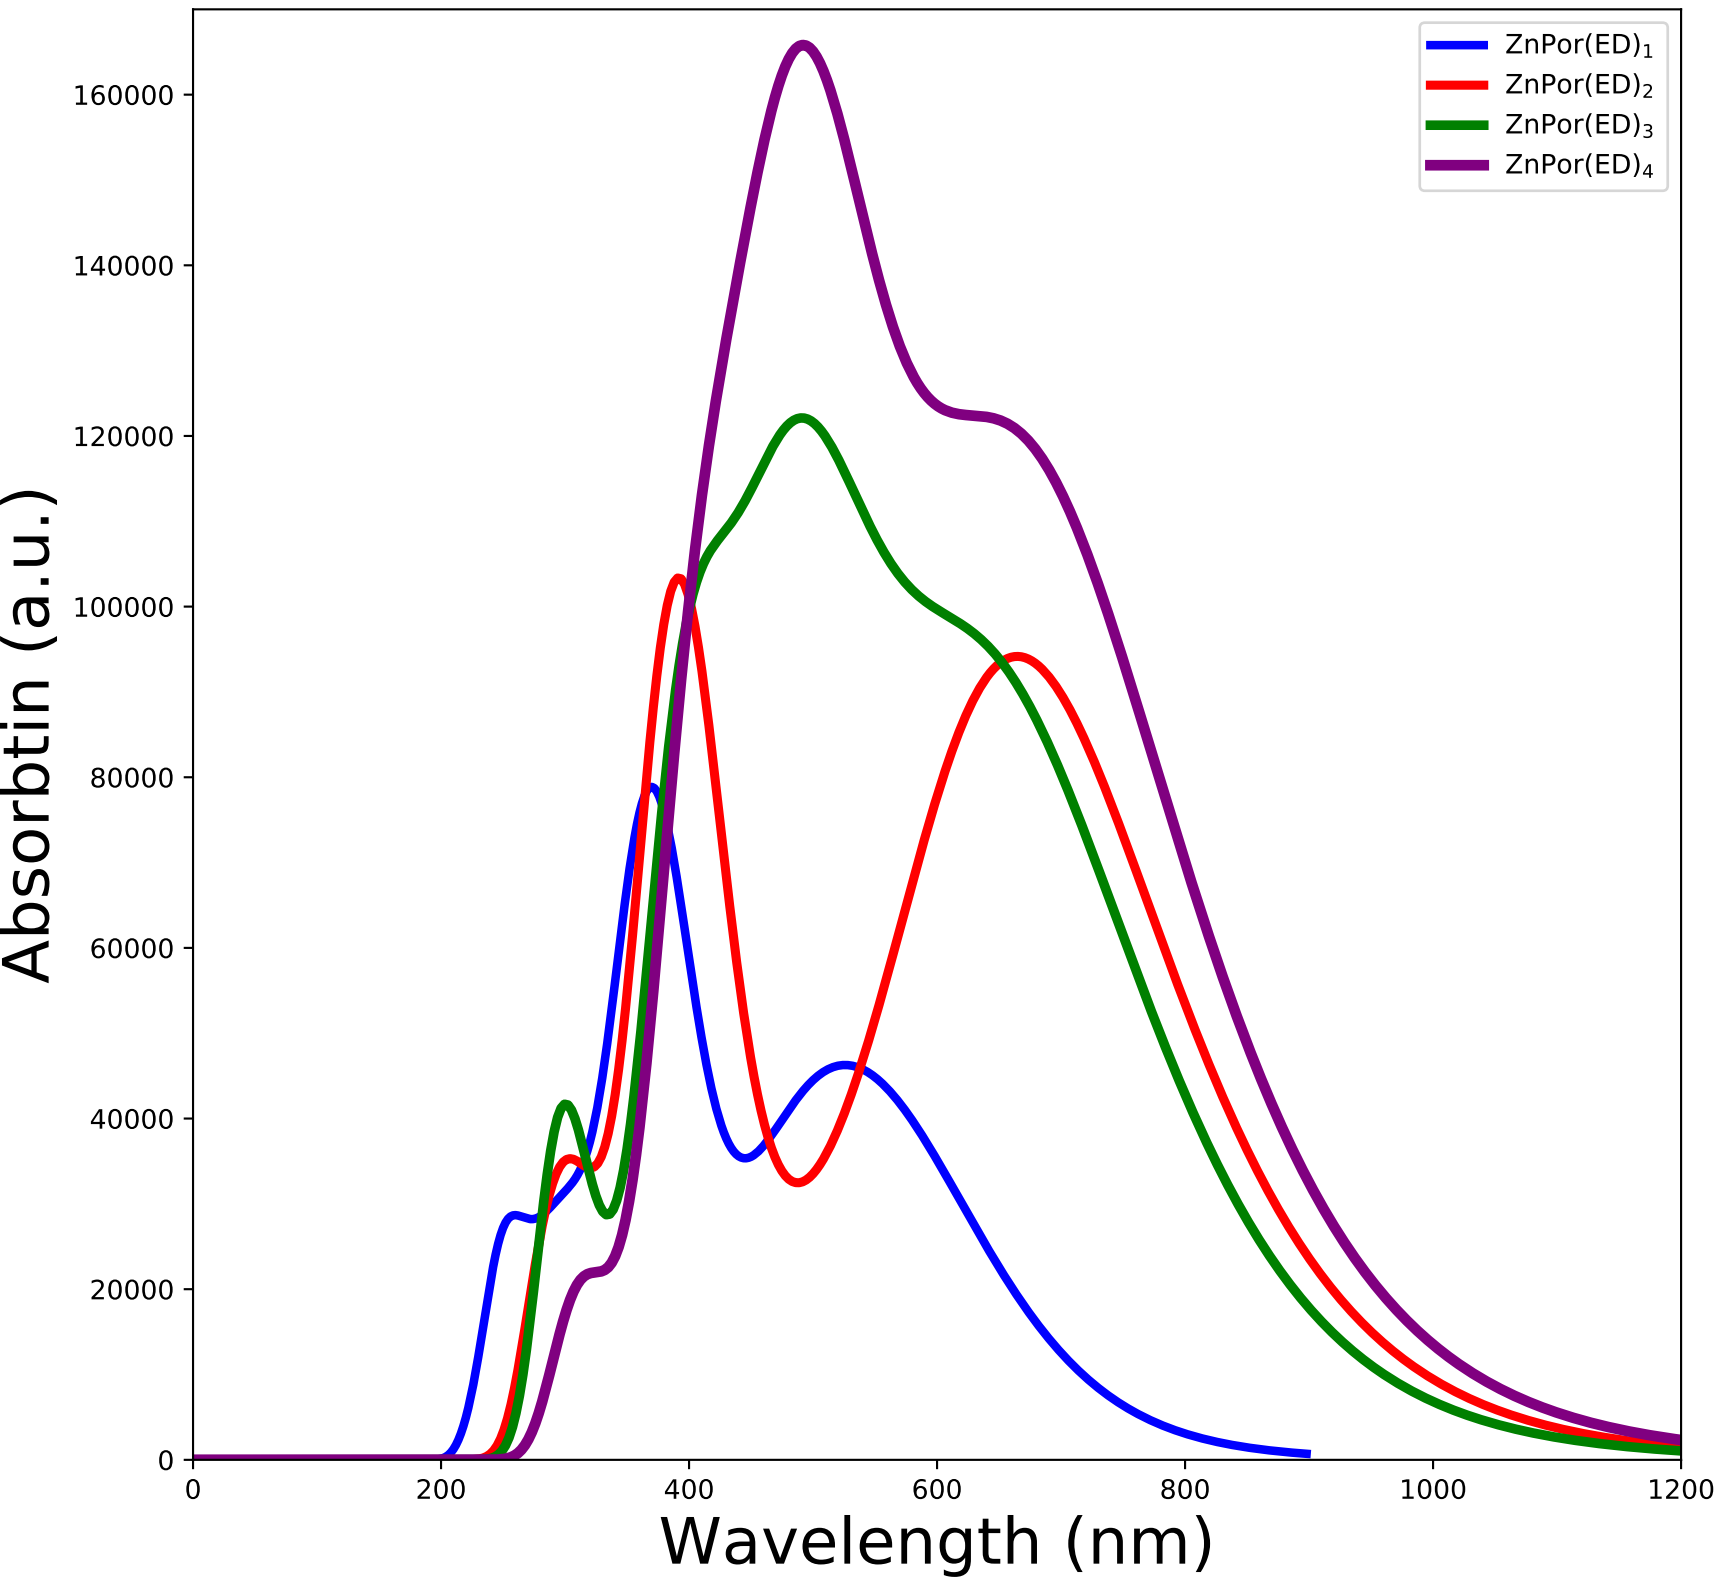

Supplement: d0cp03279d2.zip [file d0cp03279d2.zip]

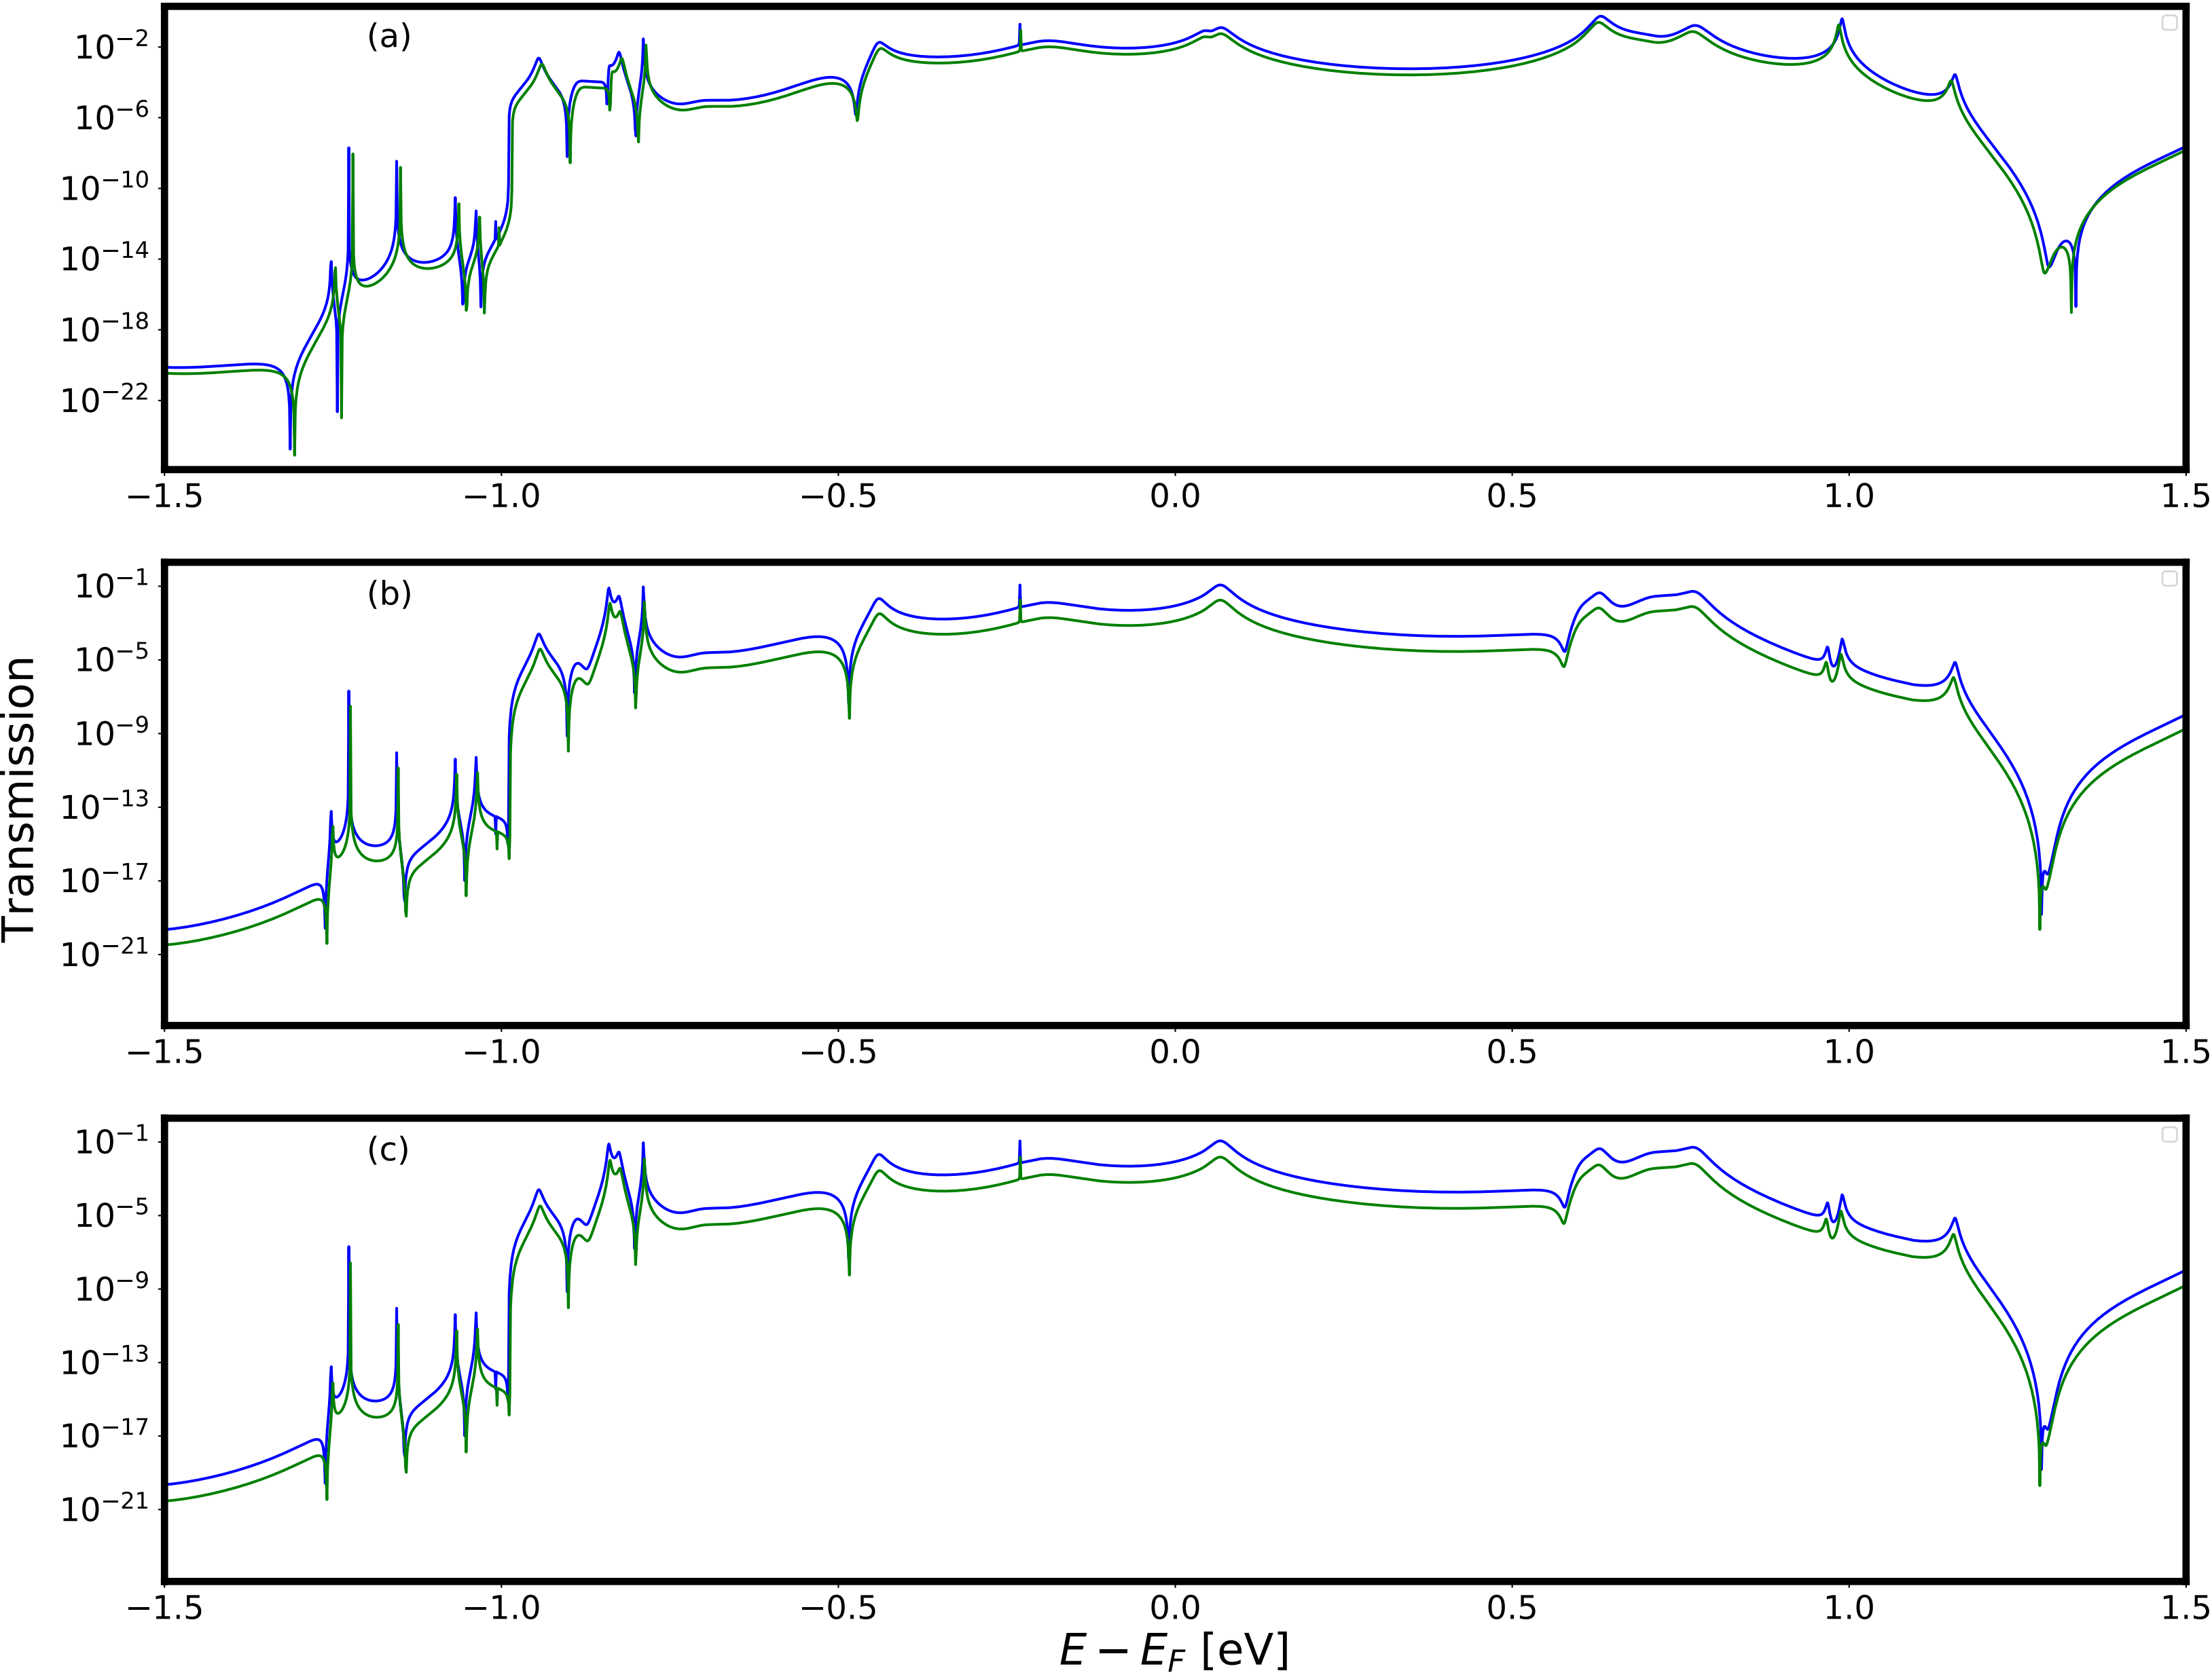

Supplement: d0cp03279d2.zip [file d0cp03279d2.zip]

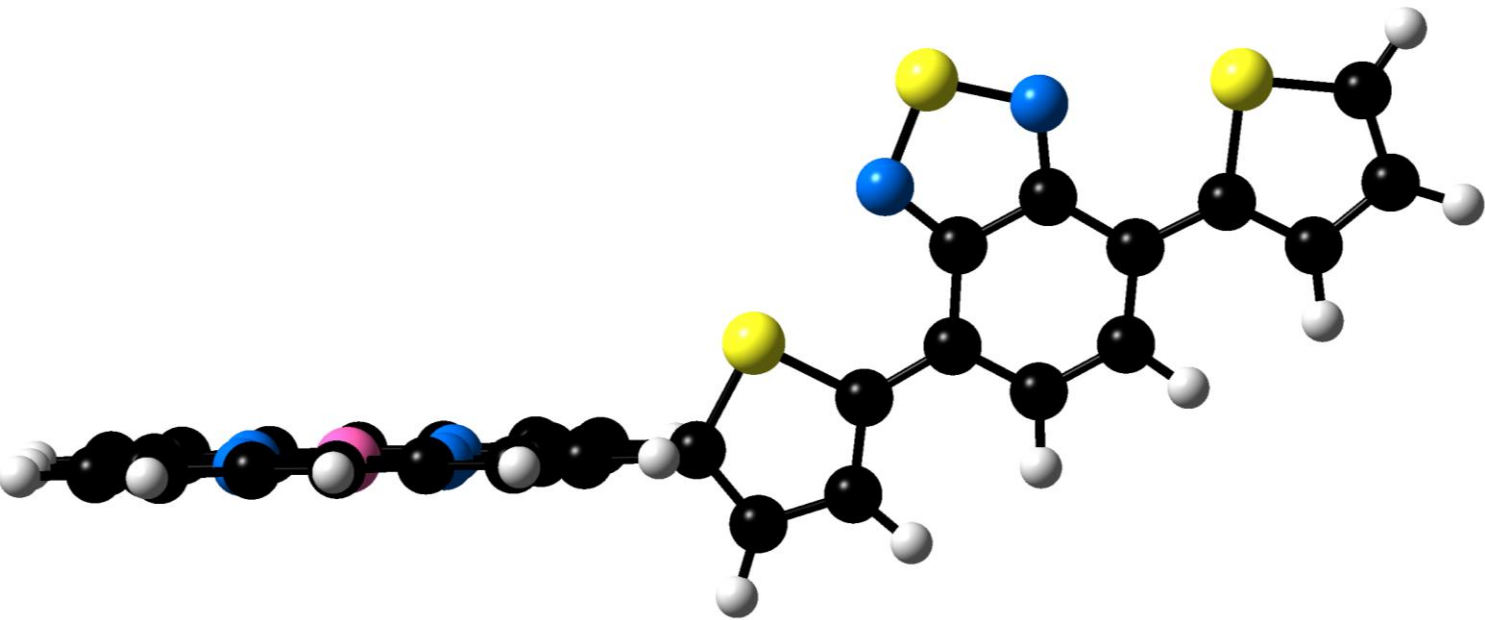

Supplement: d0cp03279d2.zip [file d0cp03279d2.zip]

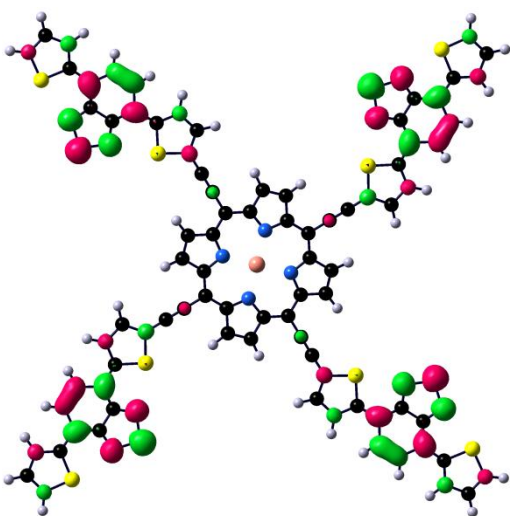

LUMO+2( $\alpha$ )

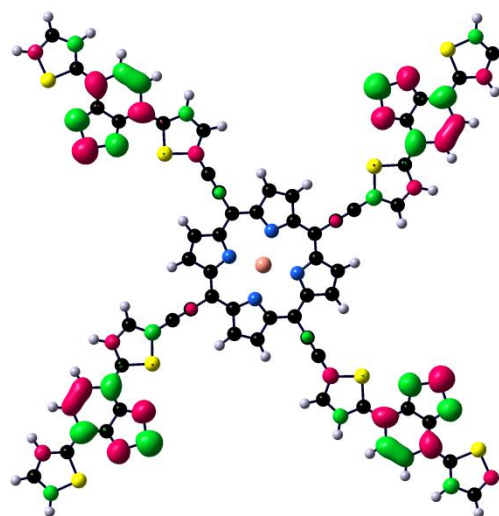

LUMO+2( $\beta$ )

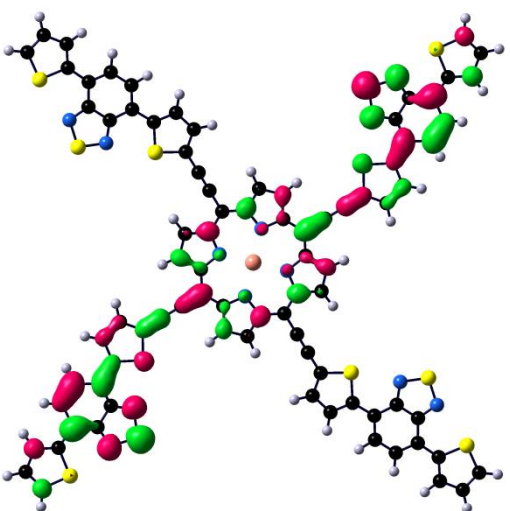

LUMO+1( $\alpha$ )

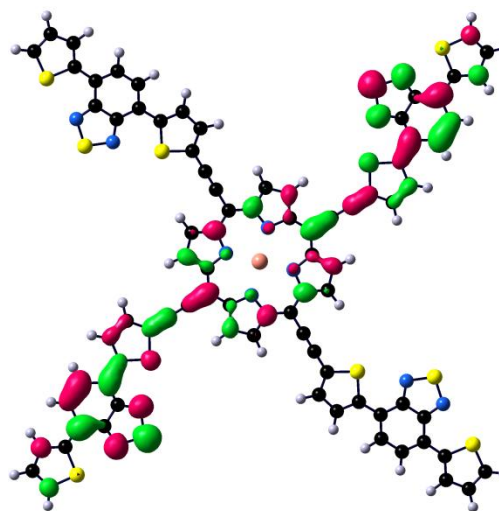

LUMO+1( $\beta$ )

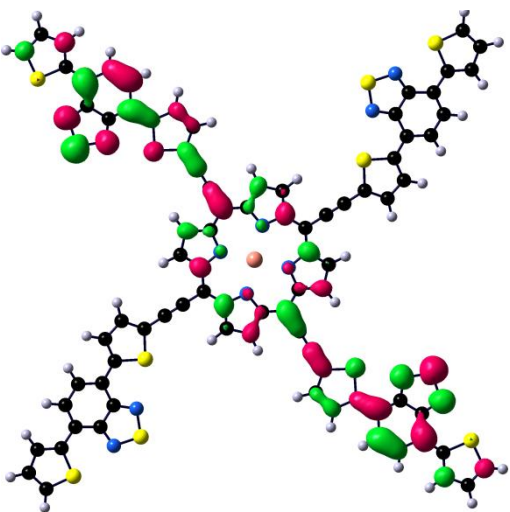

LUMO( $\alpha$ )

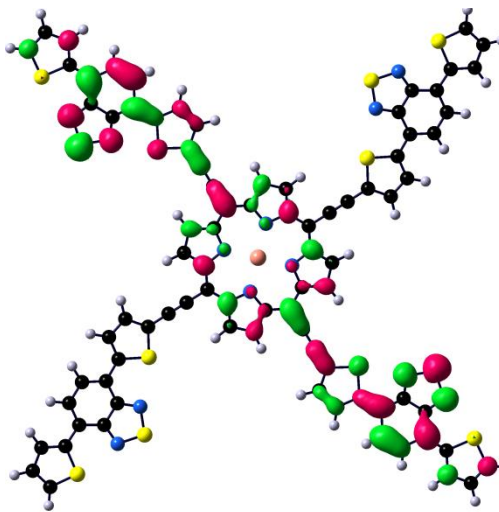

LUMO( $\beta$ )

Supplement: d0cp03279d2.zip [file d0cp03279d2.zip]

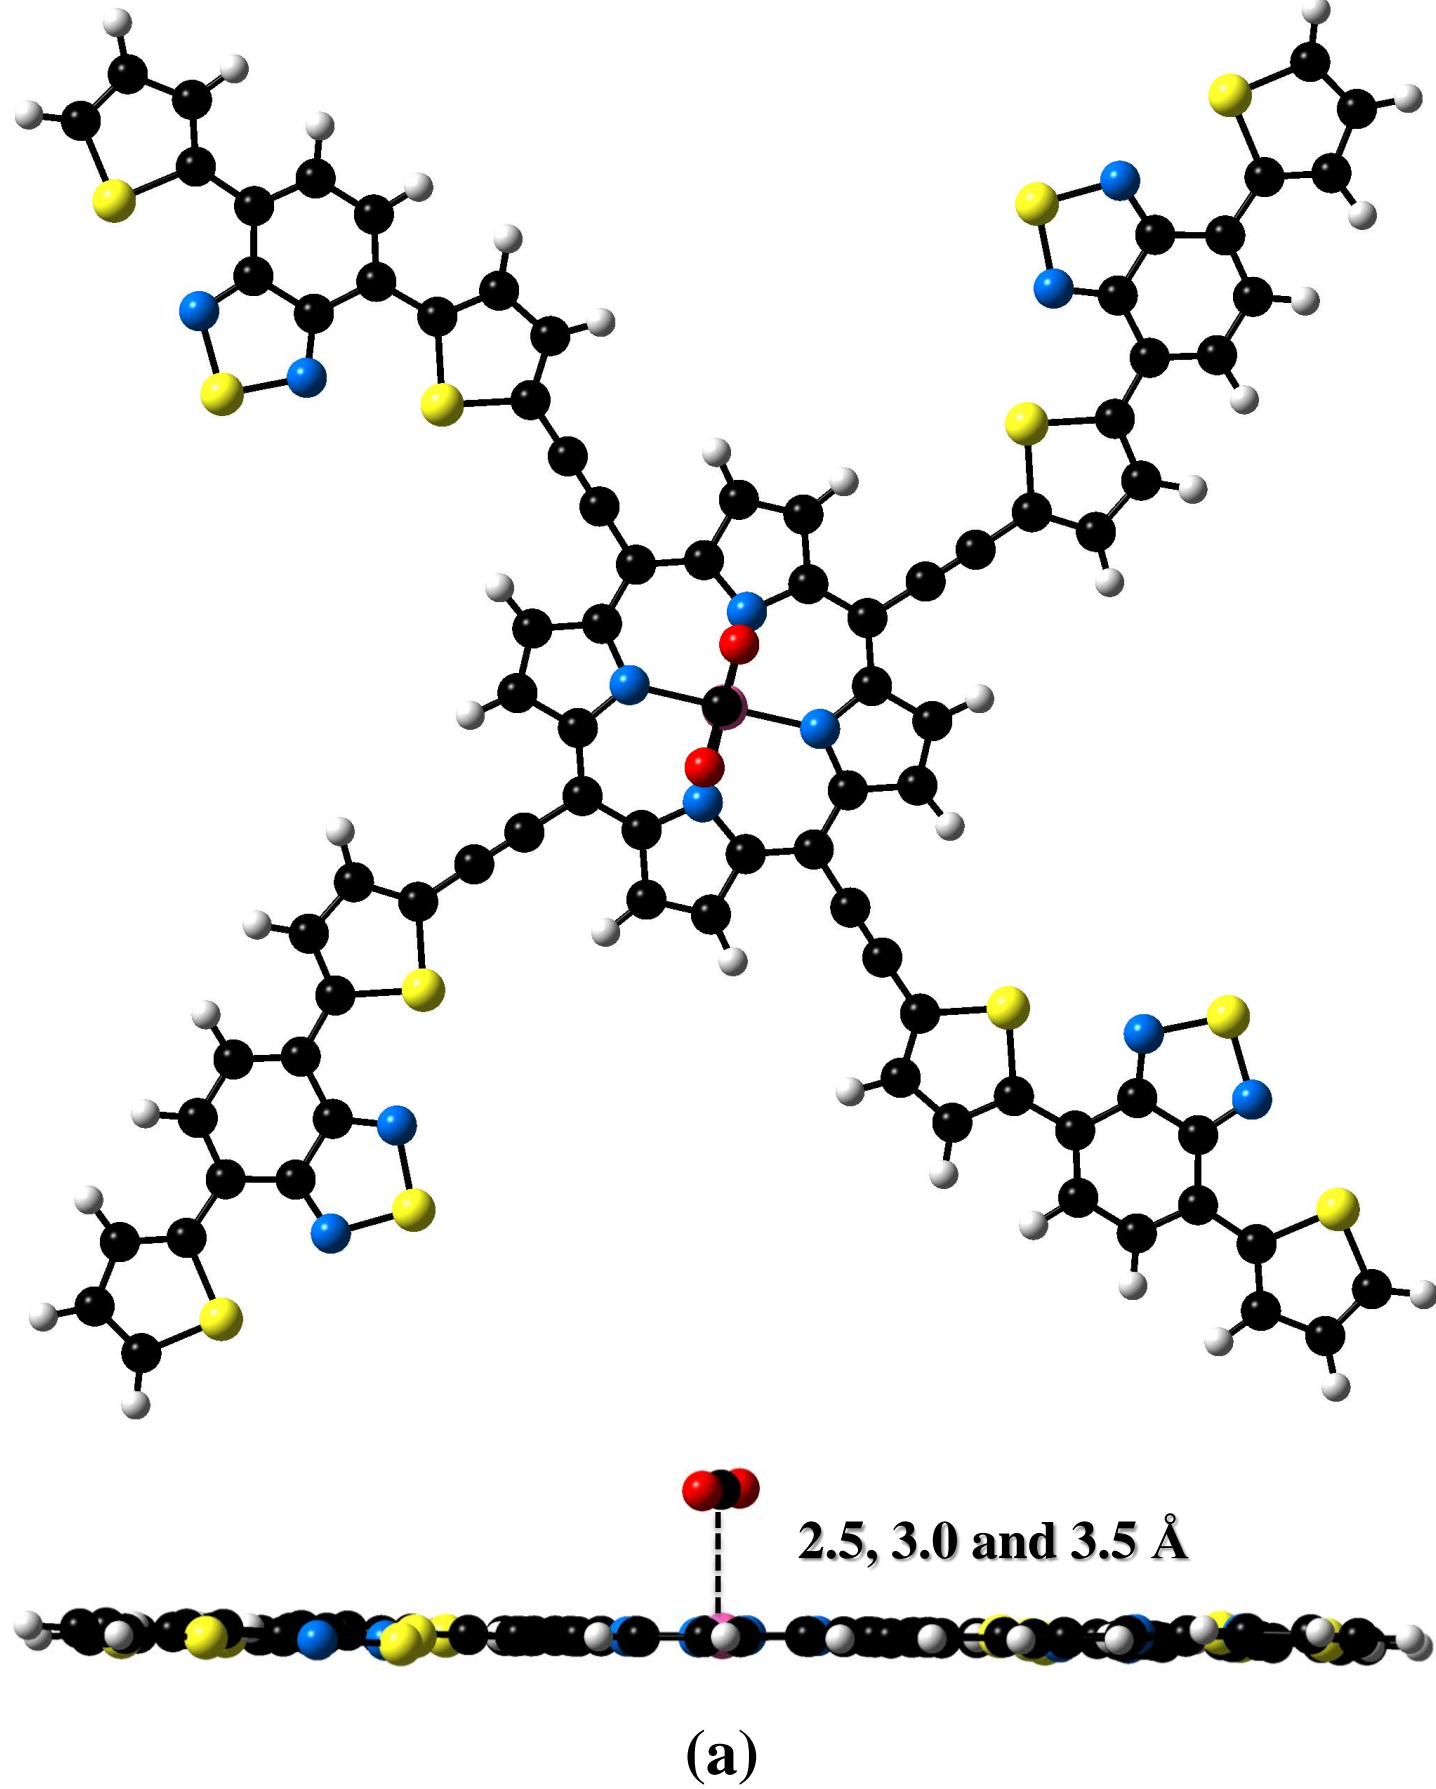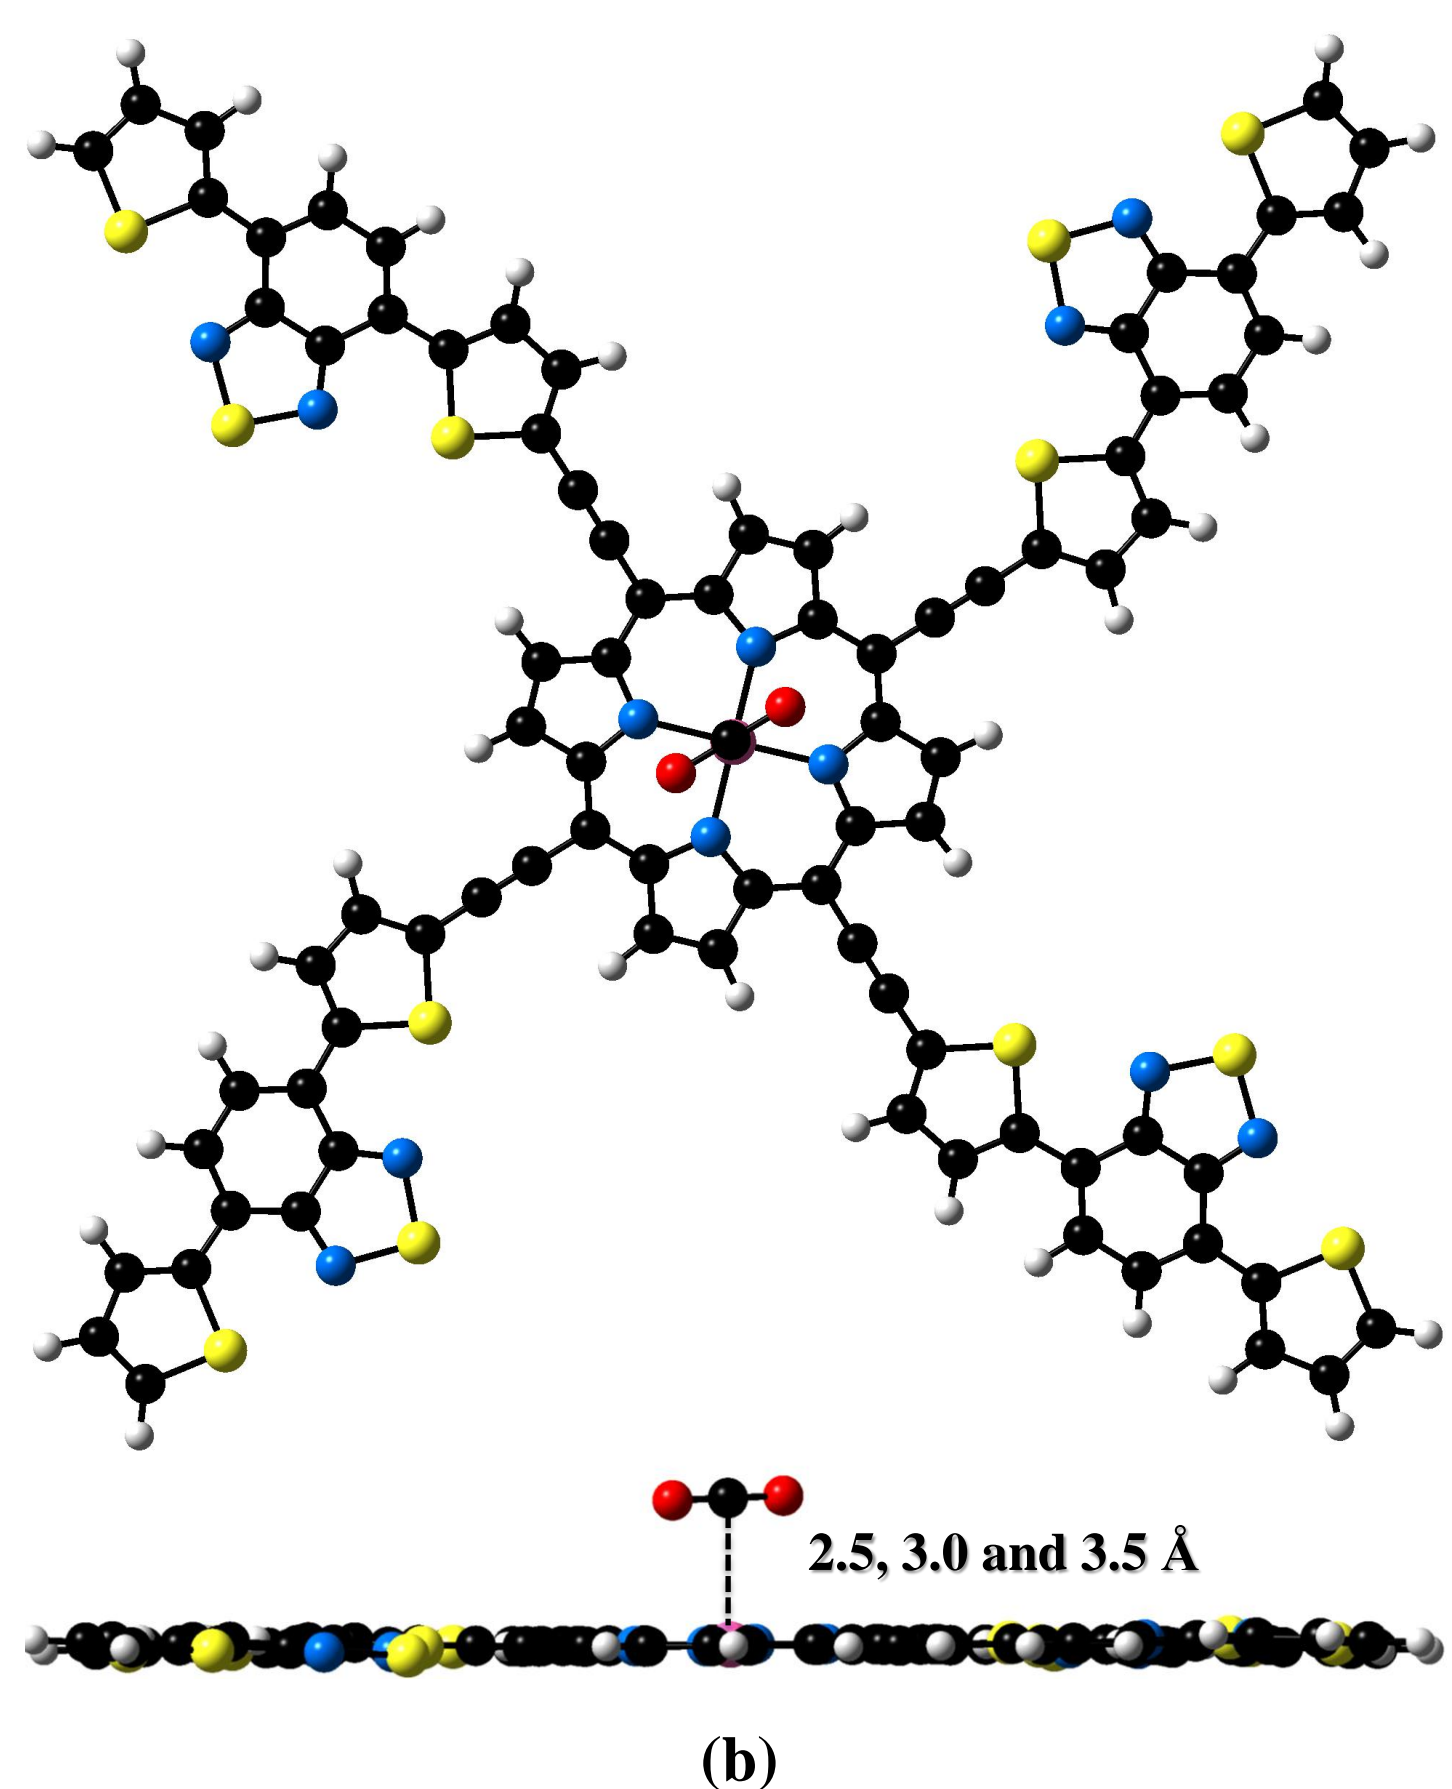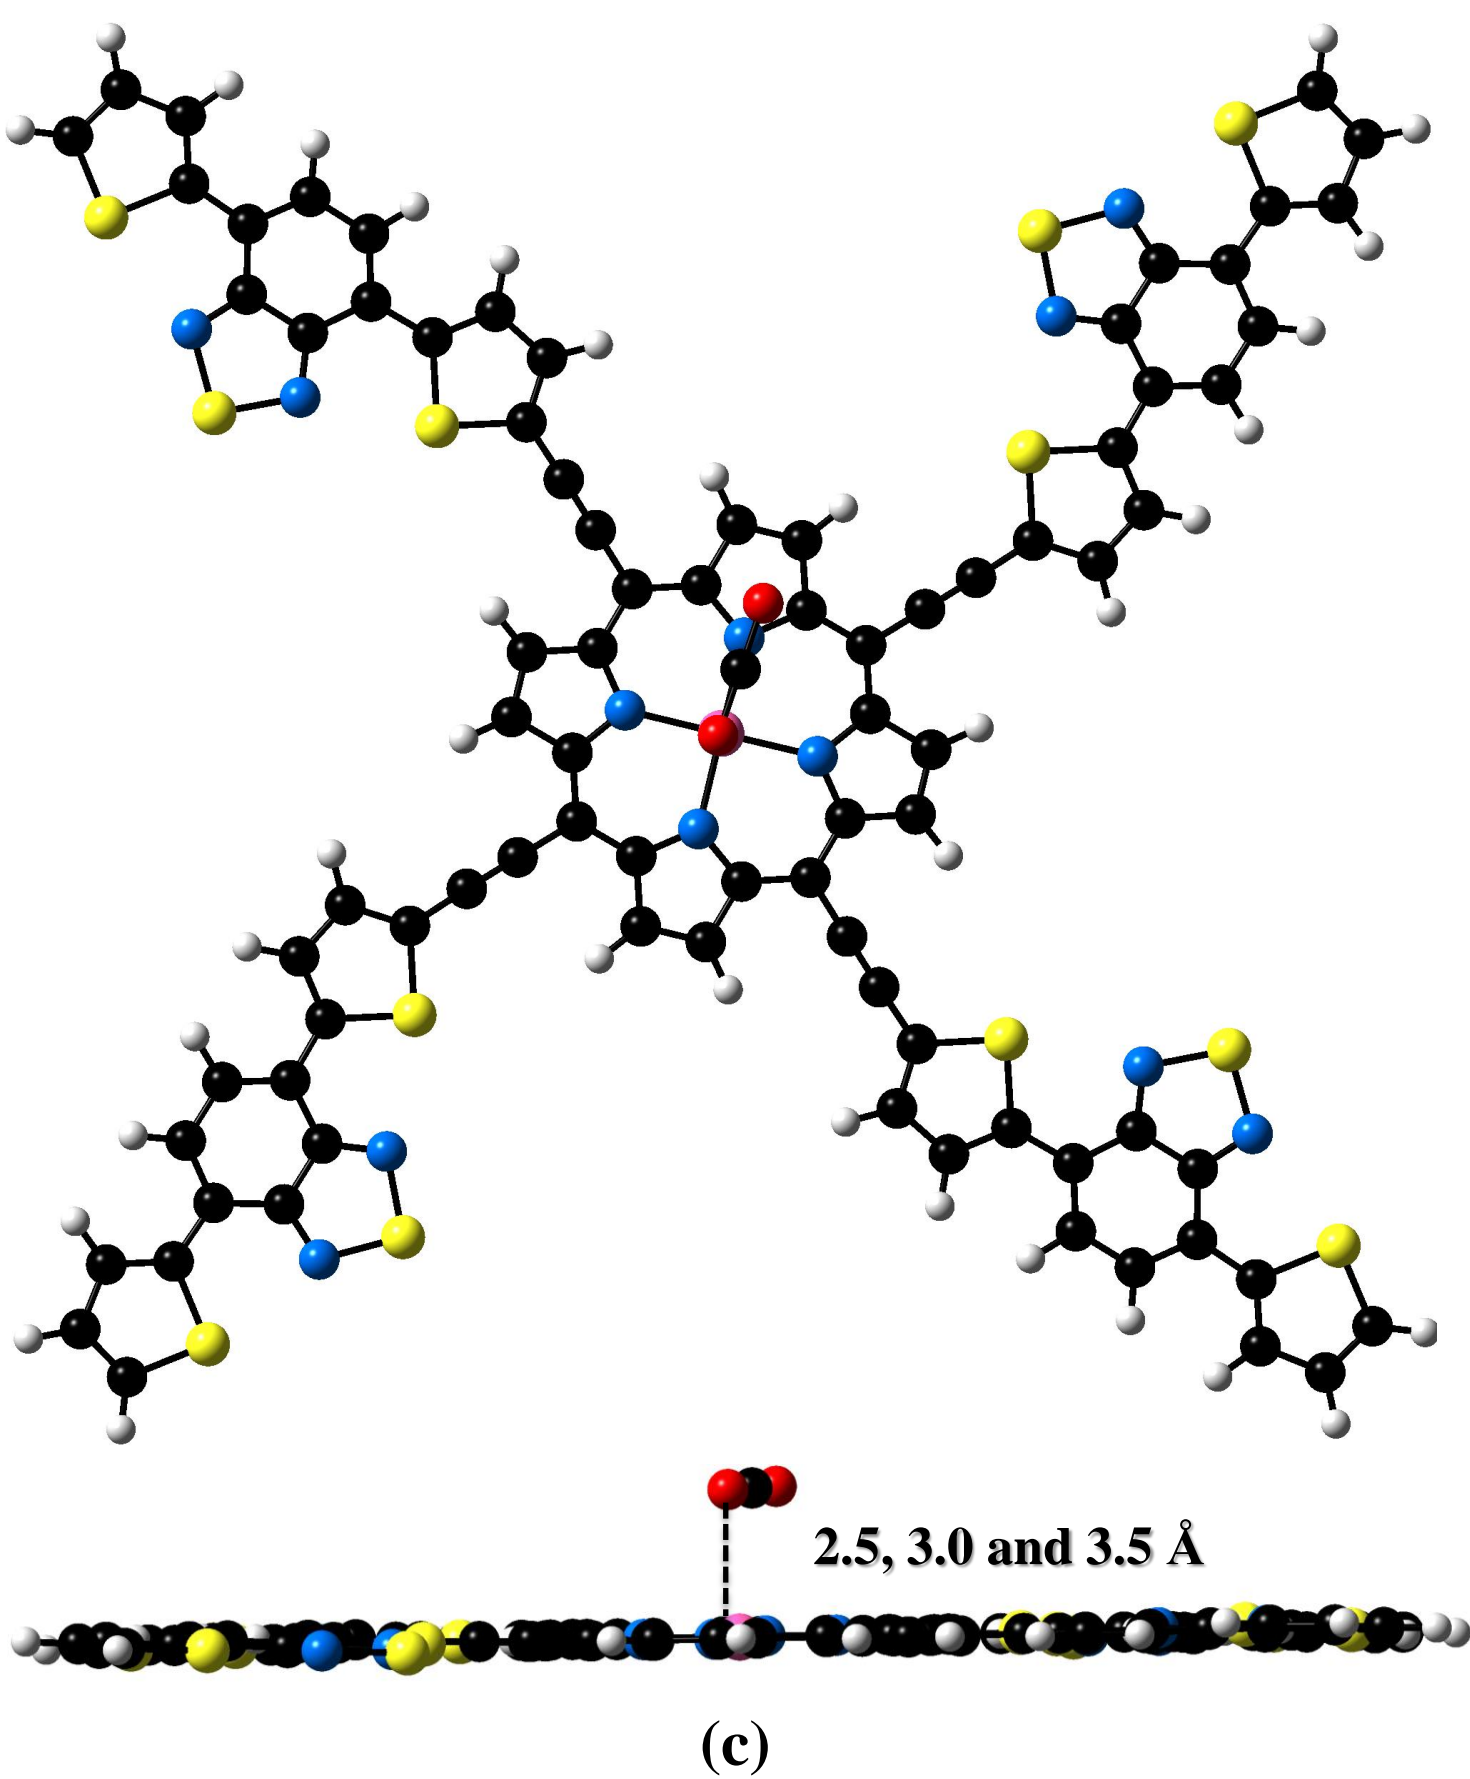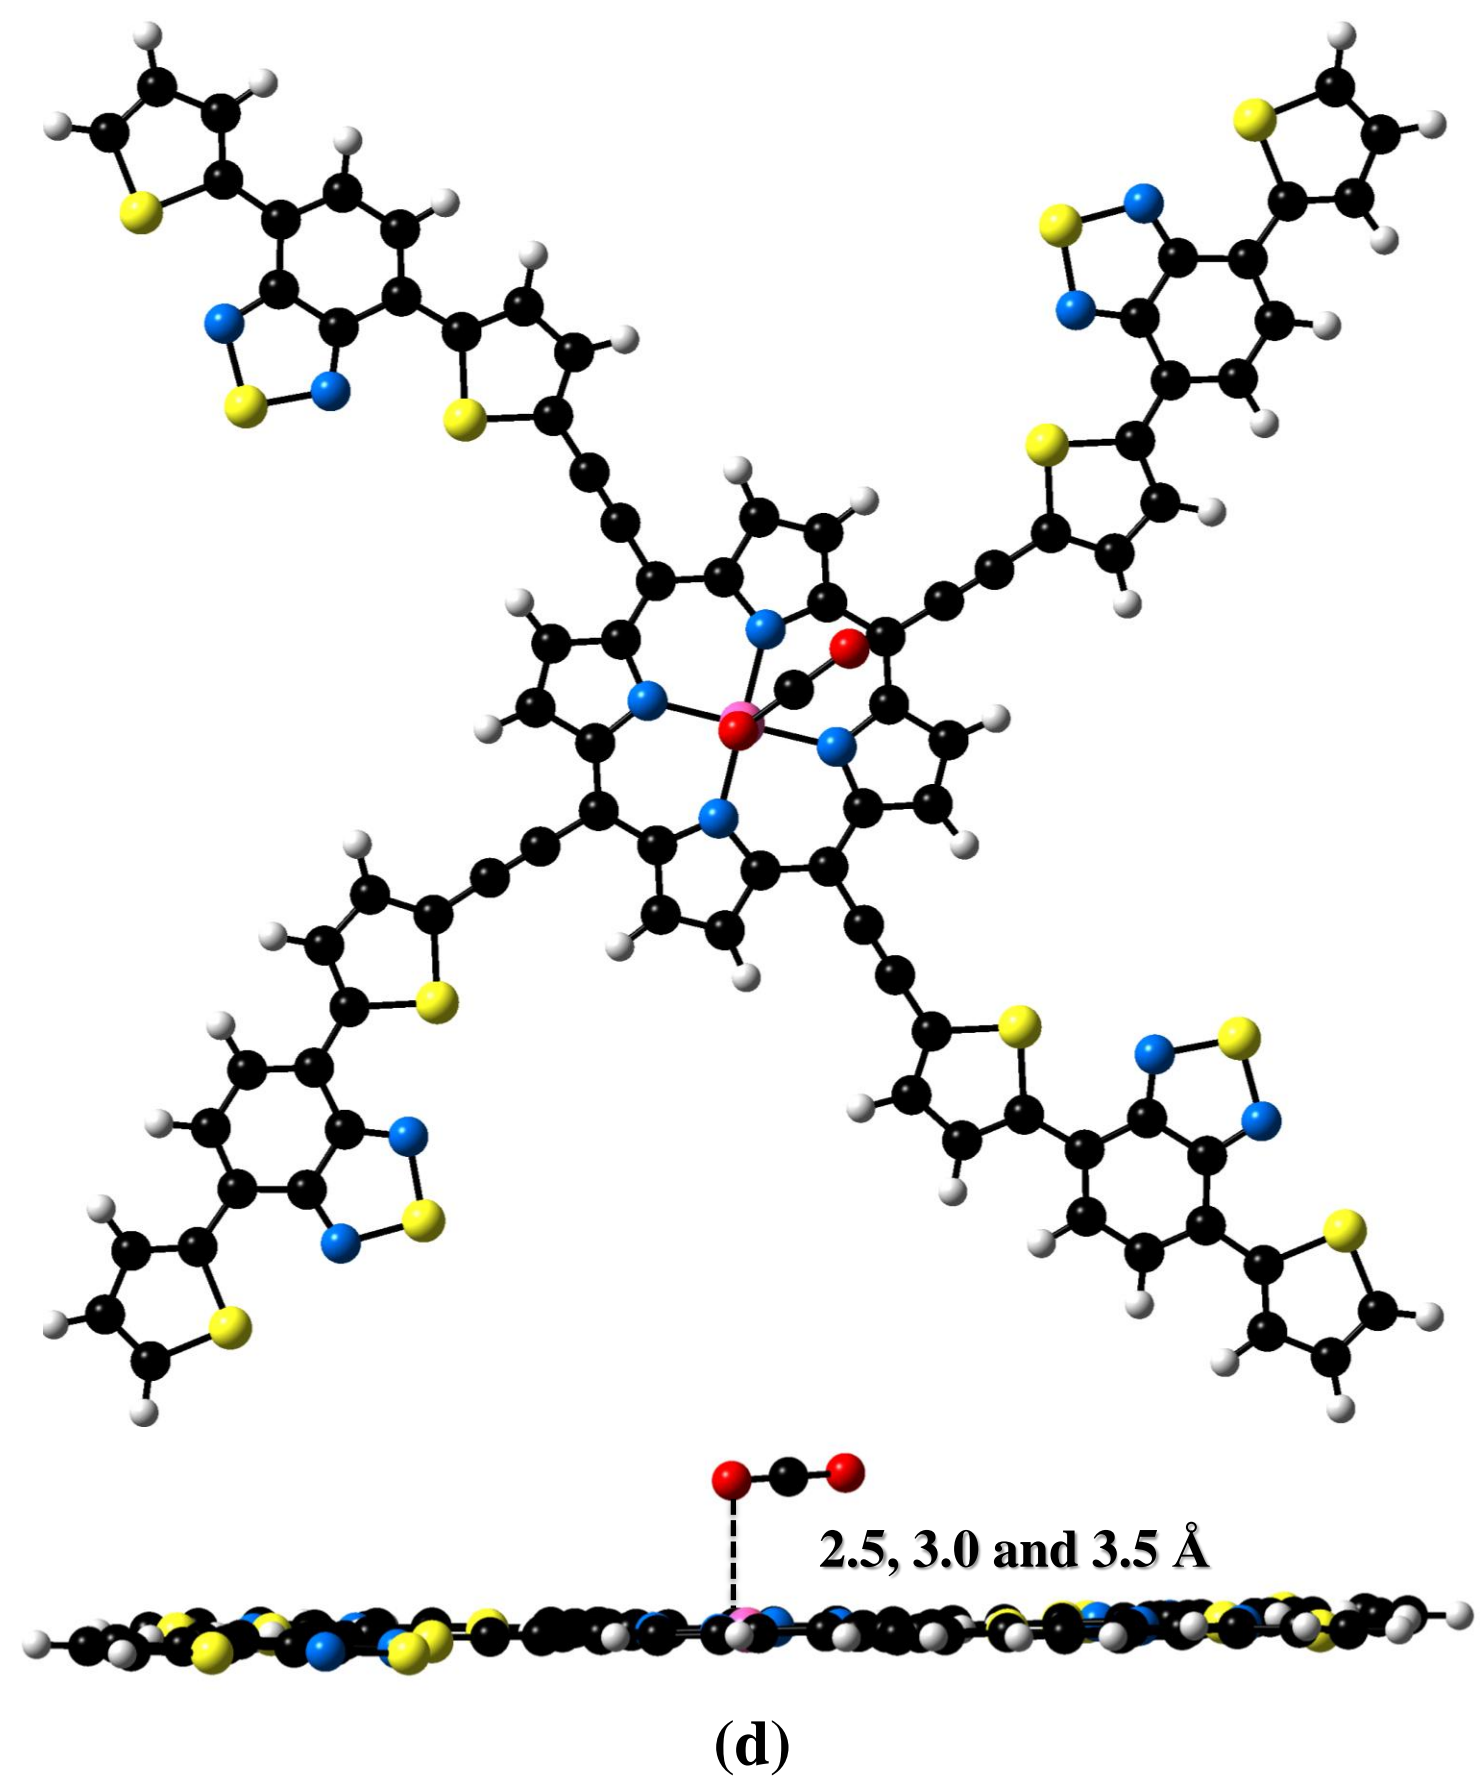

Supplement: d0cp03279d2.zip [file d0cp03279d2.zip]

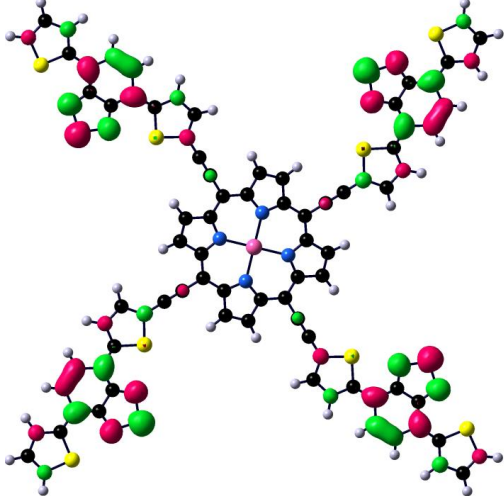

LUMO+2( $\alpha$ )

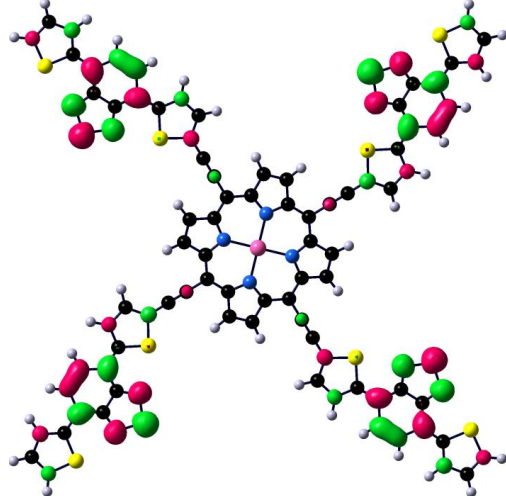

LUMO+2( $\beta$ )

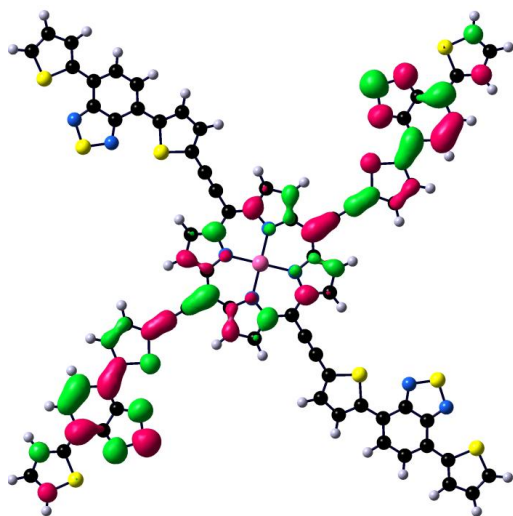

LUMO+1( $\alpha$ )

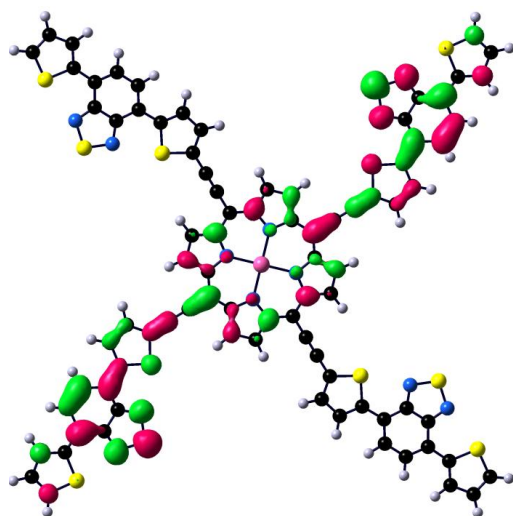

LUMO+1( $\beta$ )

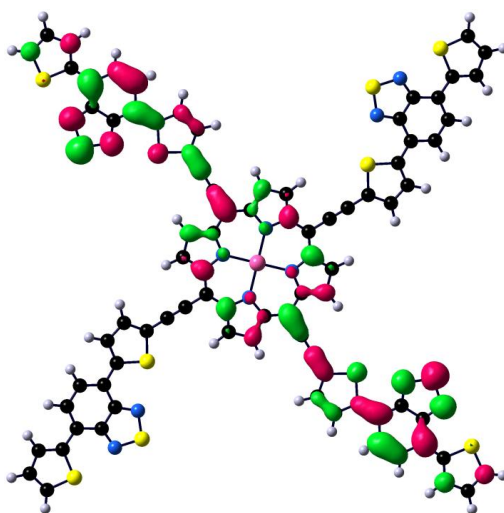

LUMO( $\alpha$ )

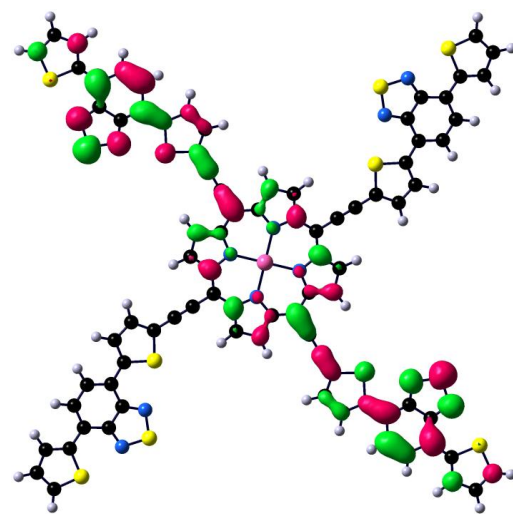

LUMO( $\beta$ )

Supplement: d0cp03279d2.zip [file d0cp03279d2.zip]

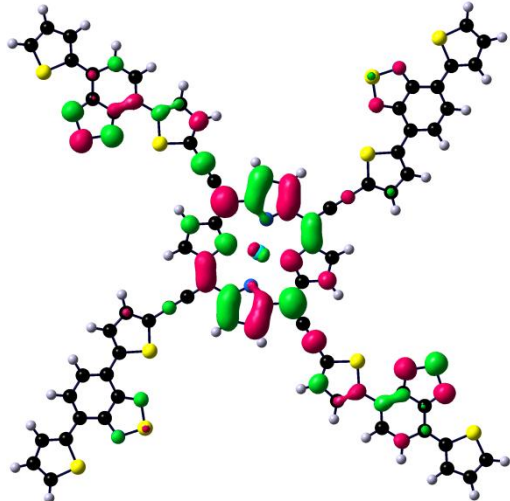

LUMO+5( $\alpha$ )

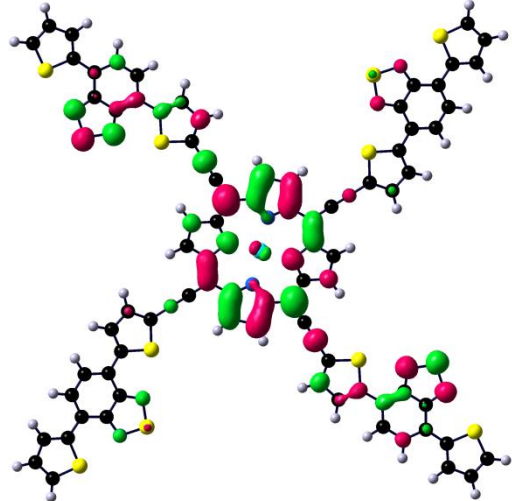

LUMO+5( $\beta$ )

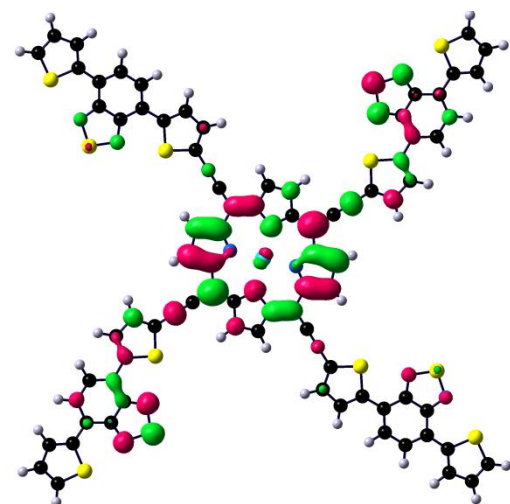

LUMO+4( $\alpha$ )

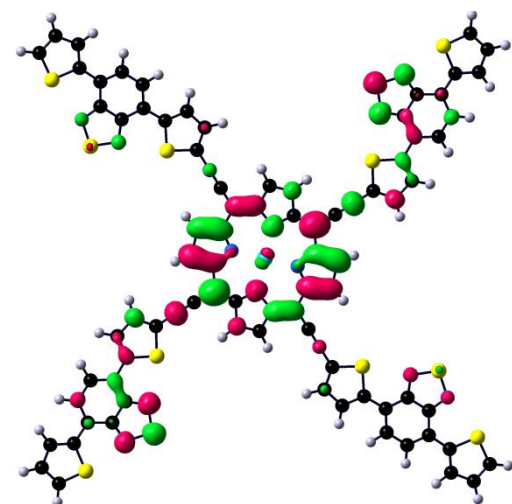

LUMO+4( $\beta$ )

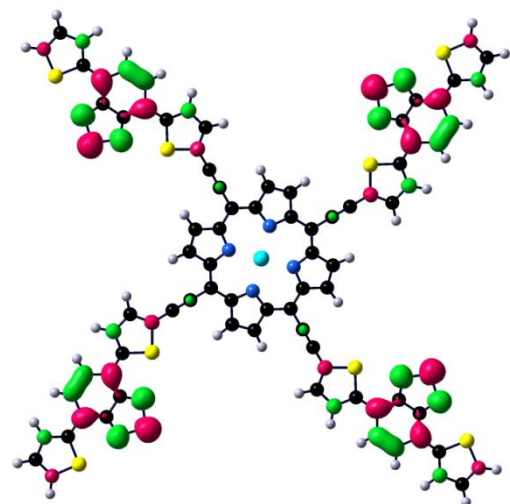

LUMO+3( $\alpha$ )

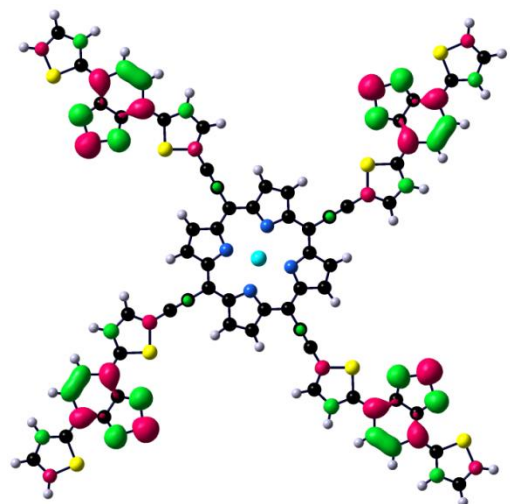

LUMO+3( $\beta$ )

Supplement: d0cp03279d2.zip [file d0cp03279d2.zip]

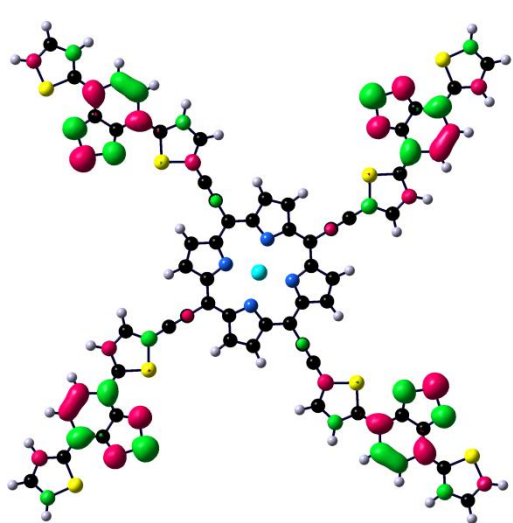

LUMO+2( $\alpha$ )

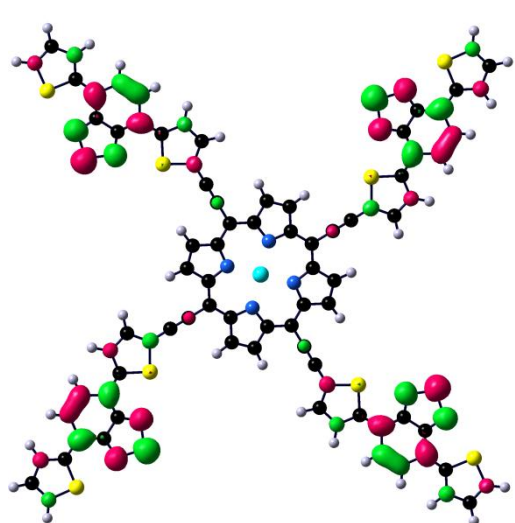

LUMO+2( $\beta$ )

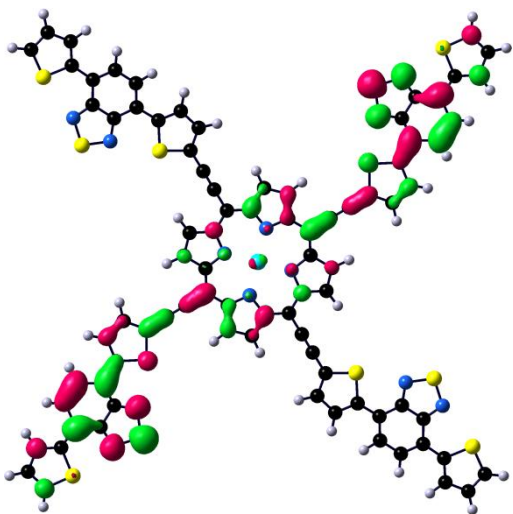

LUMO+1( $\alpha$ )

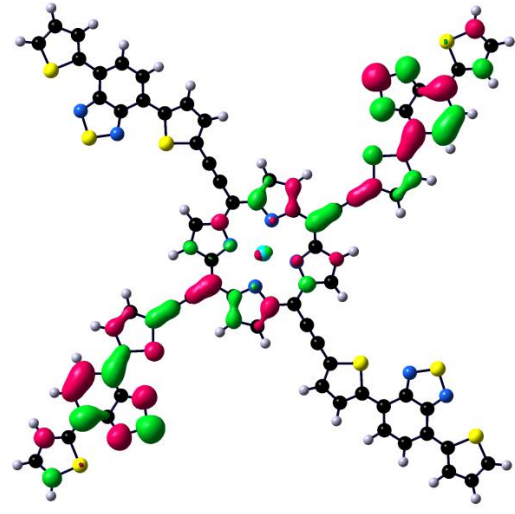

LUMO+1( $\beta$ )

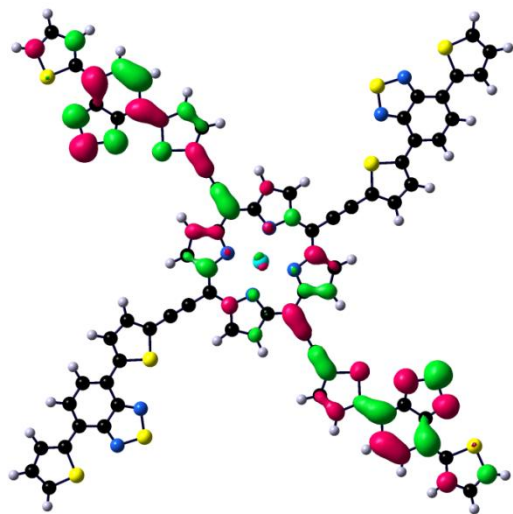

LUMO( $\alpha$ )

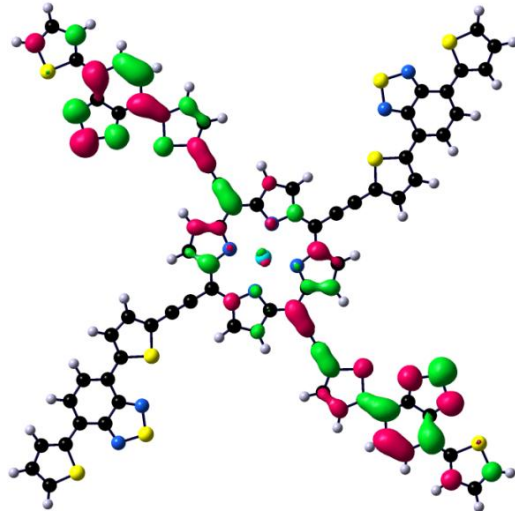

LUMO( $\beta$ )

Supplement: d0cp03279d2.zip [file d0cp03279d2.zip]

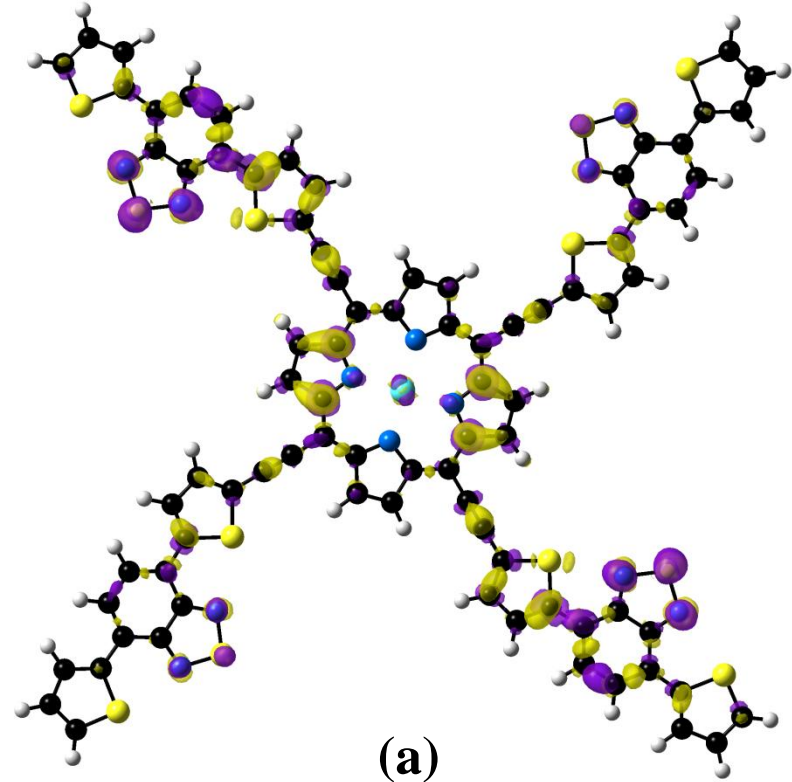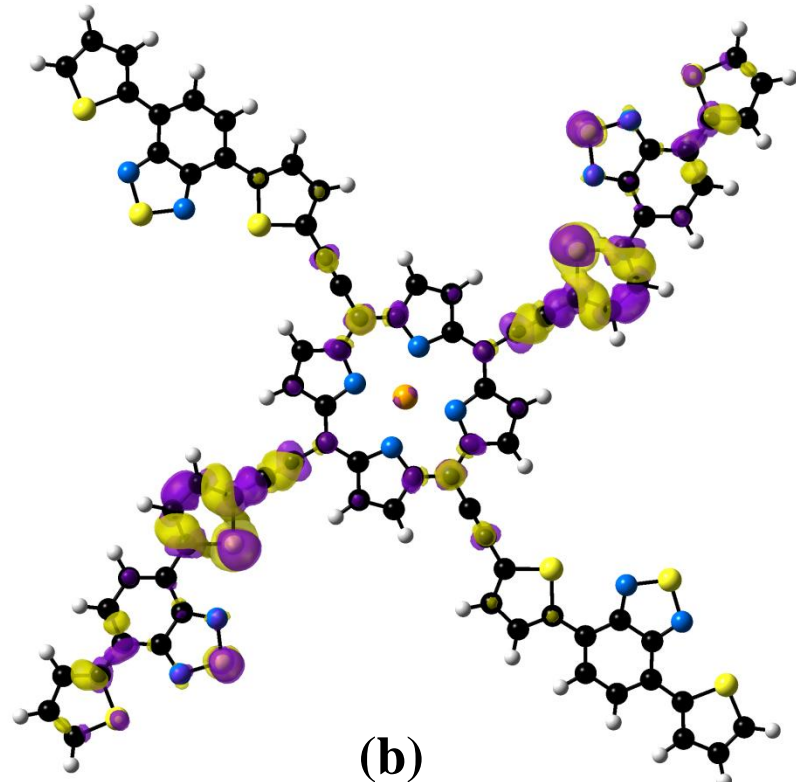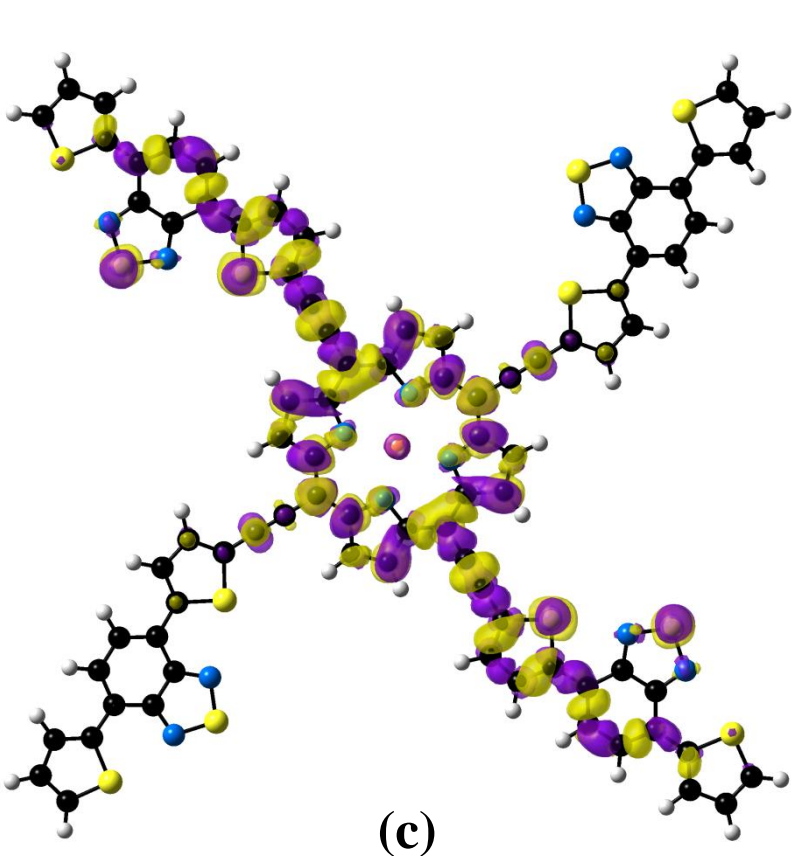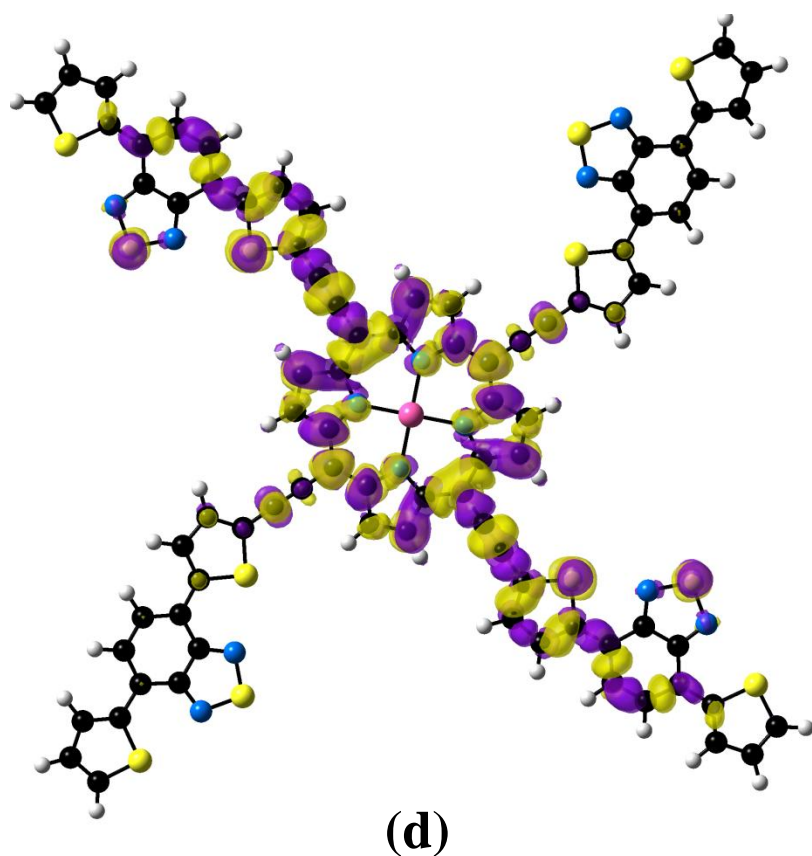

Supplement: d0cp03279d2.zip [file d0cp03279d2.zip]

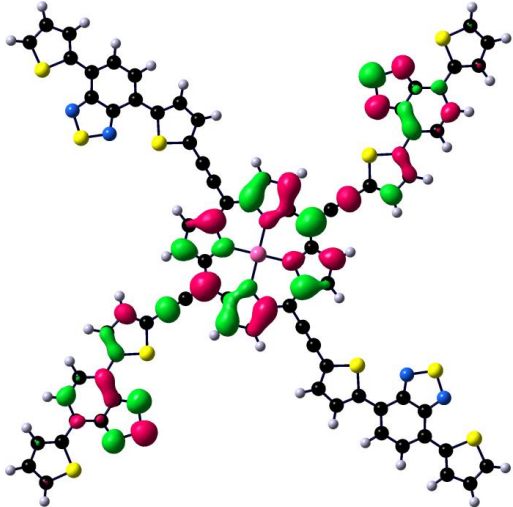

LUMO+5( $\alpha$ )

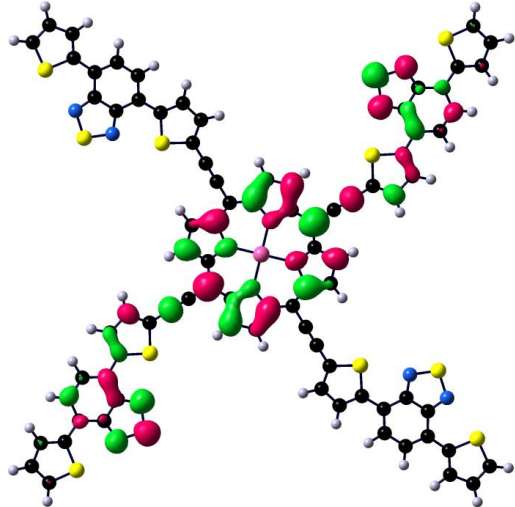

LUMO+5( $\beta$ )

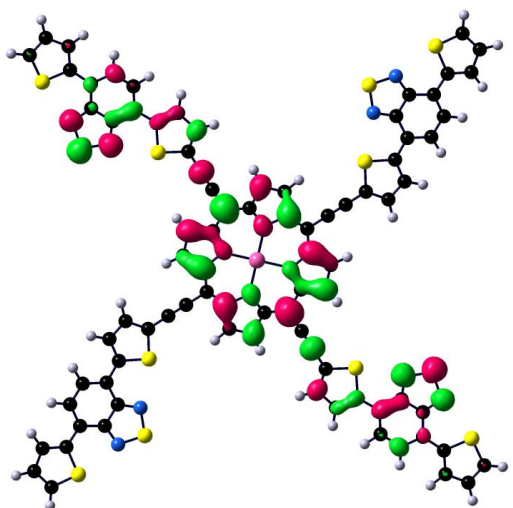

LUMO+4( $\alpha$ )

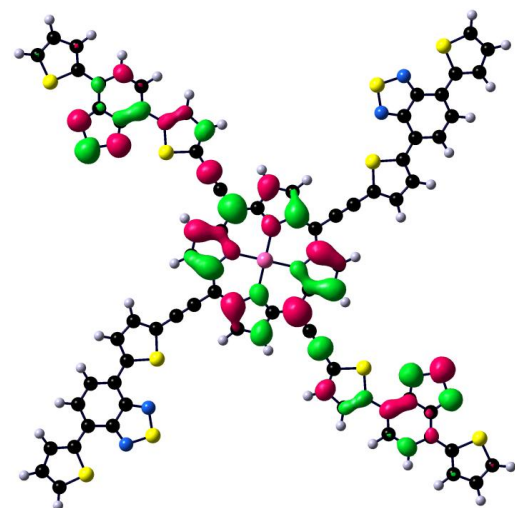

LUMO+4( $\beta$ )

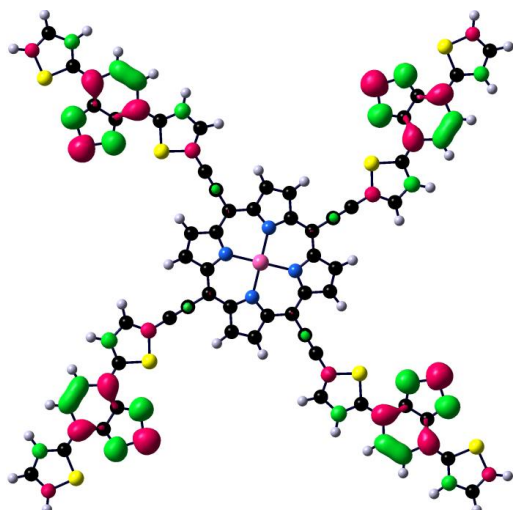

LUMO+3( $\alpha$ )

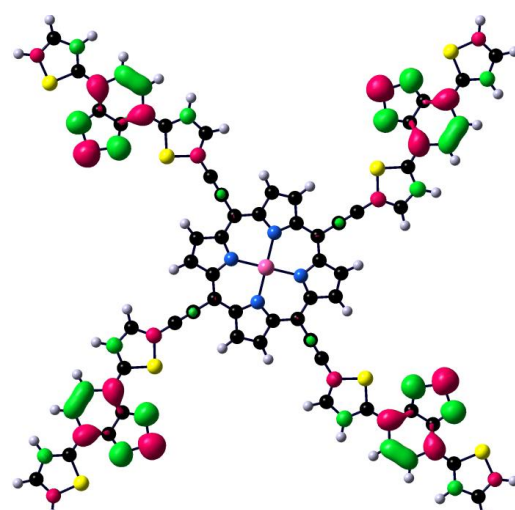

LUMO+3( $\beta$ )

Supplement: d0cp03279d2.zip [file d0cp03279d2.zip]

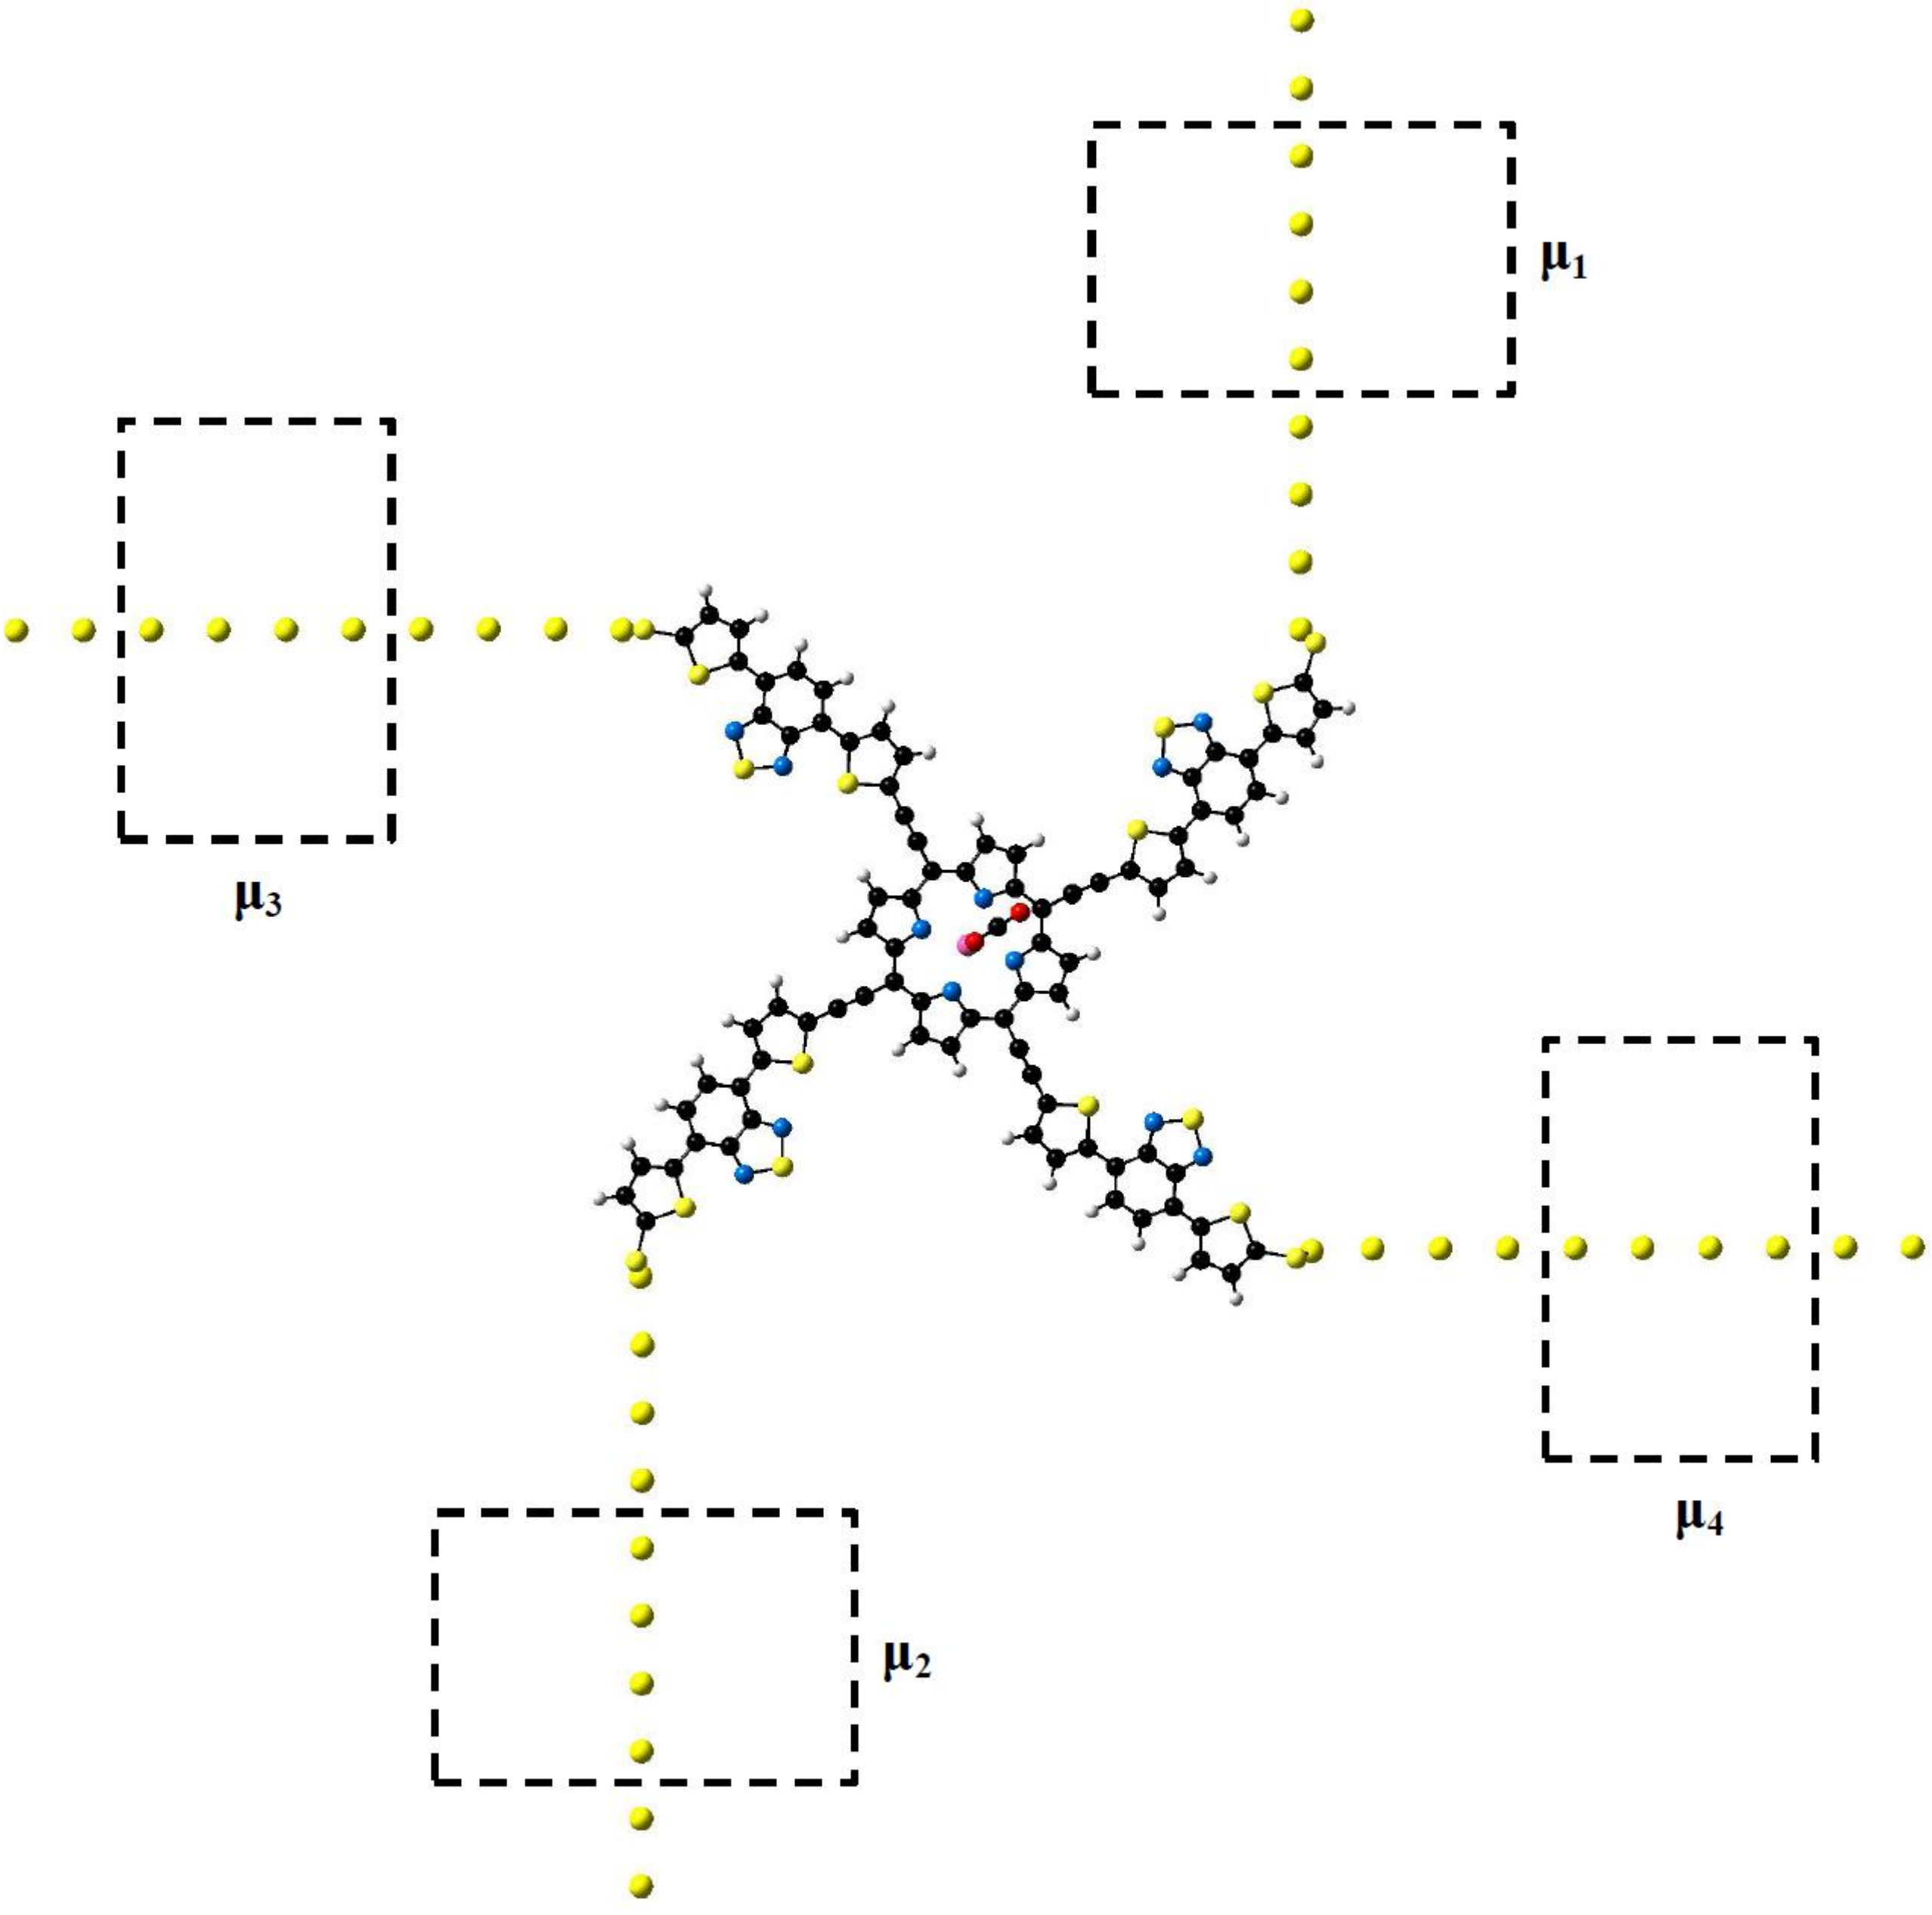

Supplement: d0cp03279d2.zip [file d0cp03279d2.zip]

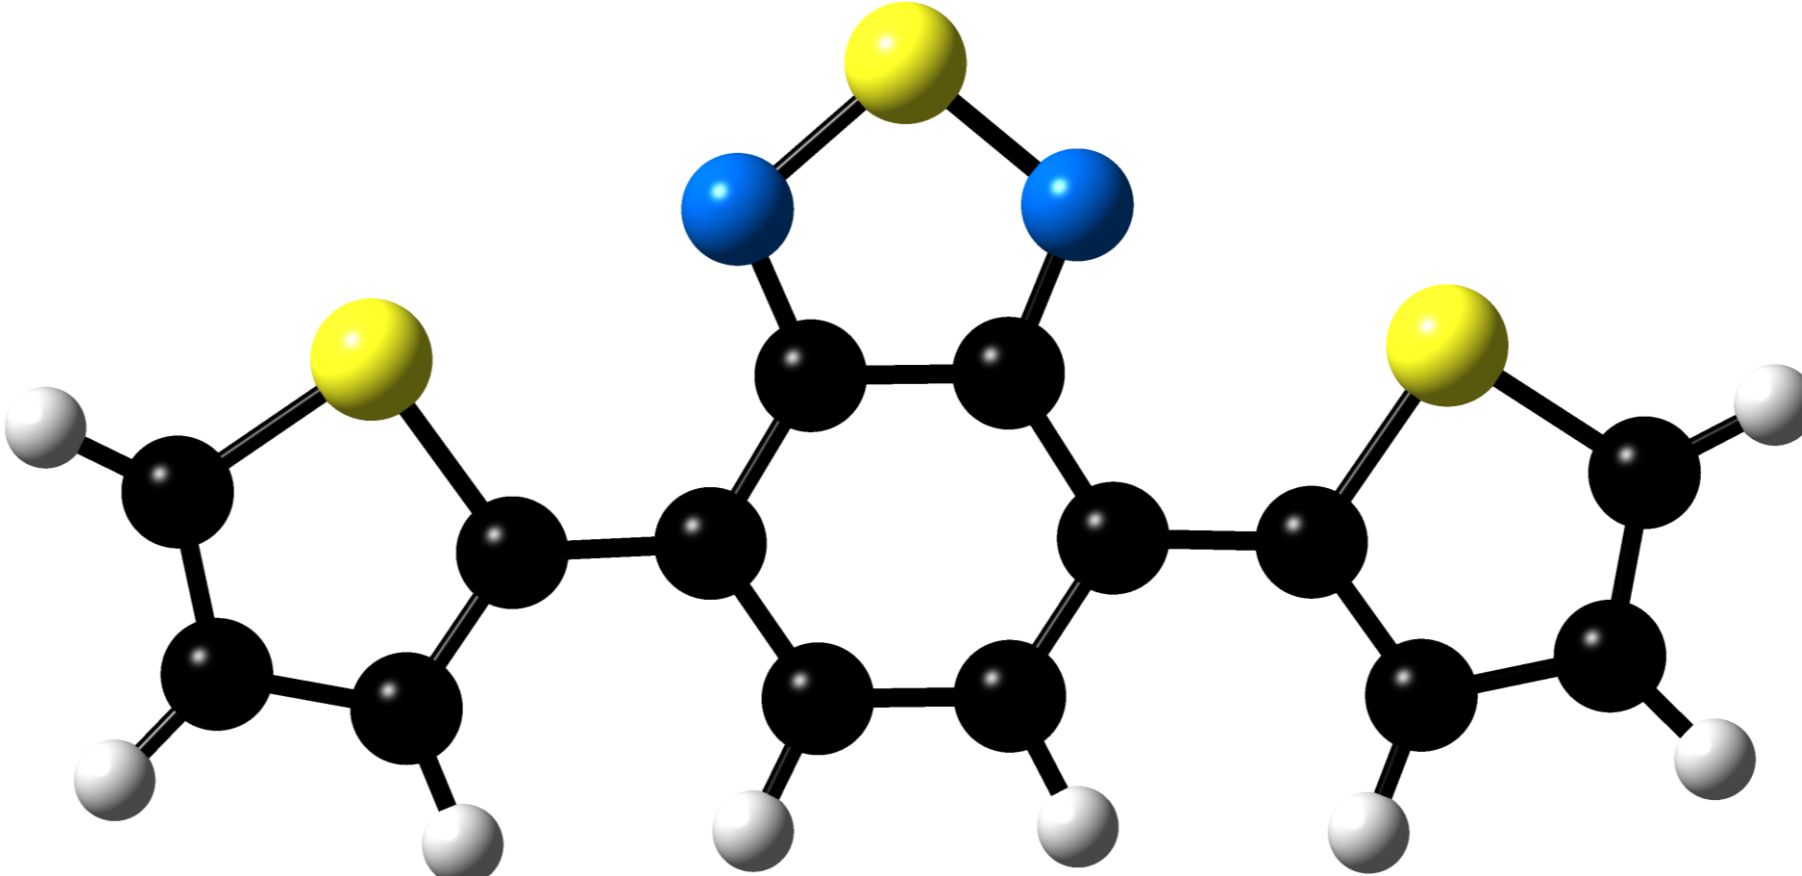

Supplement: d0cp03279d2.zip [file d0cp03279d2.zip]

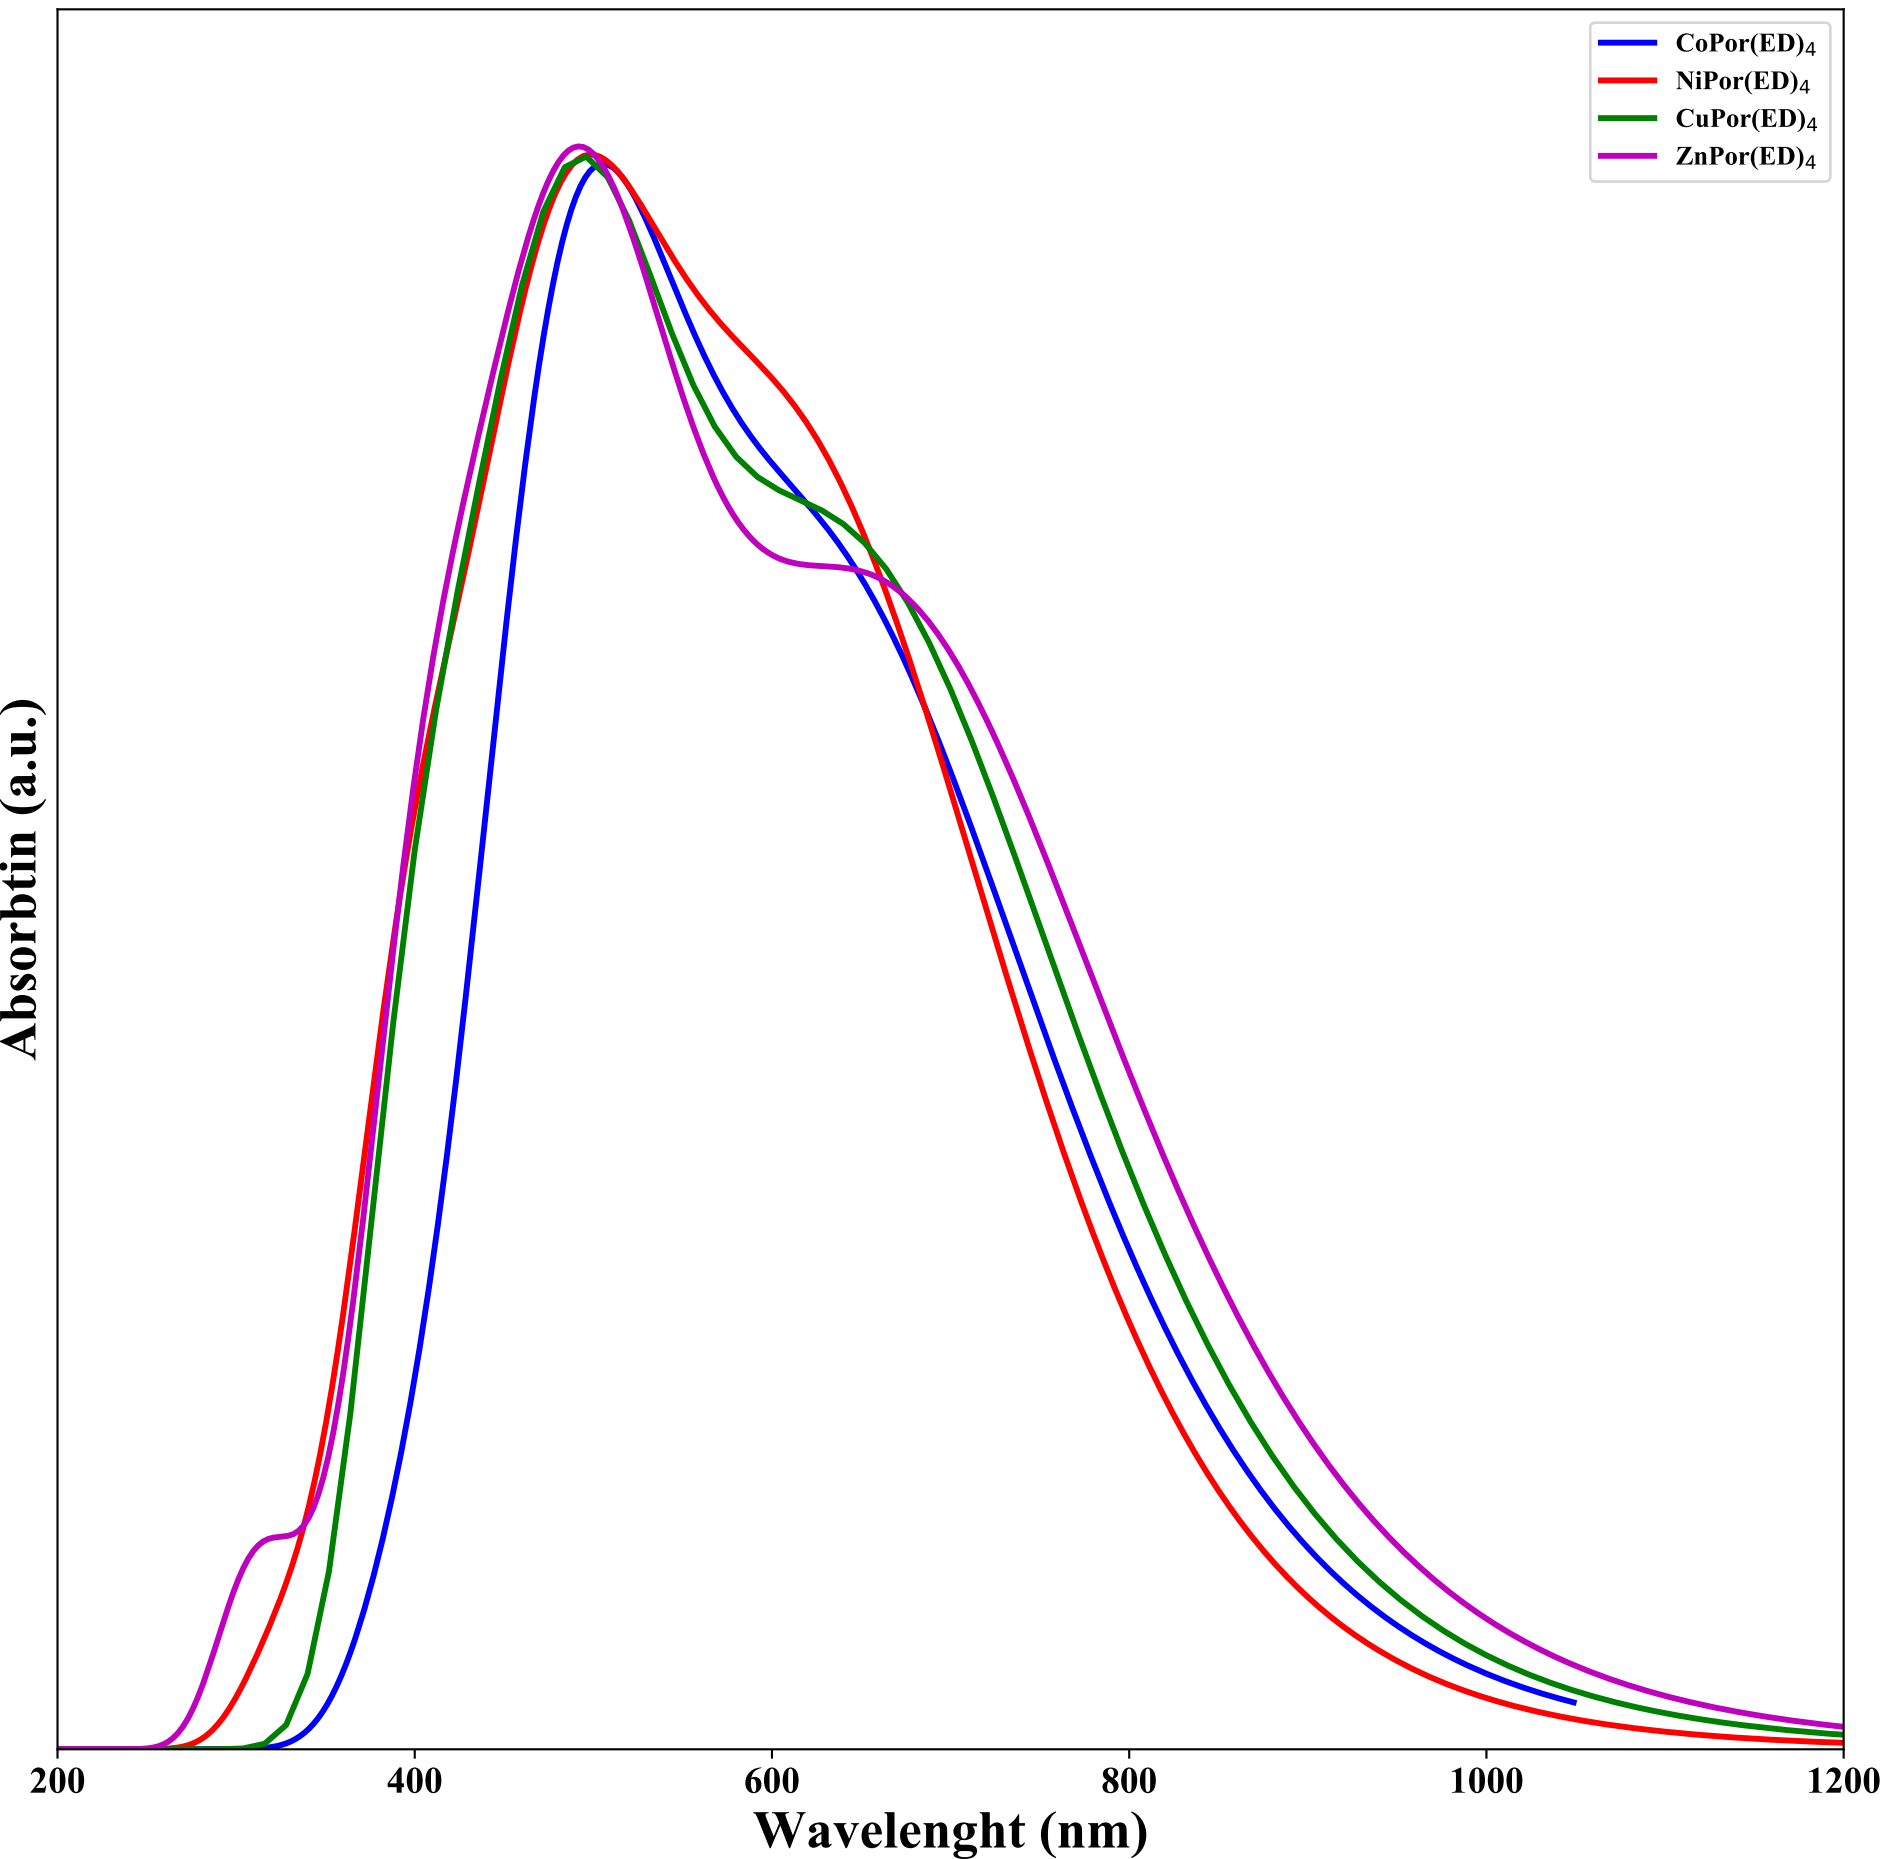

Supplement: d0cp03279d2.zip [file d0cp03279d2.zip]

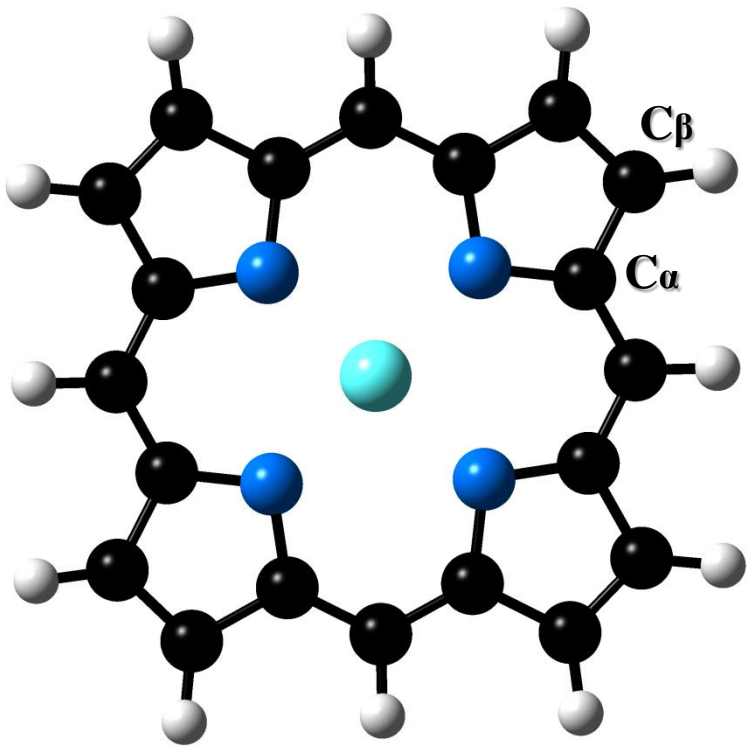

(a)

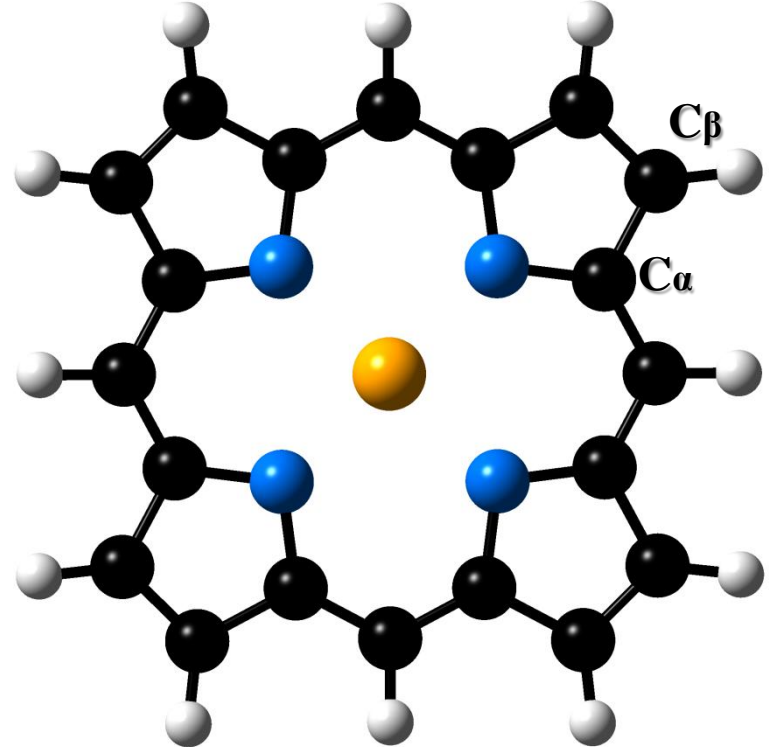

(b)

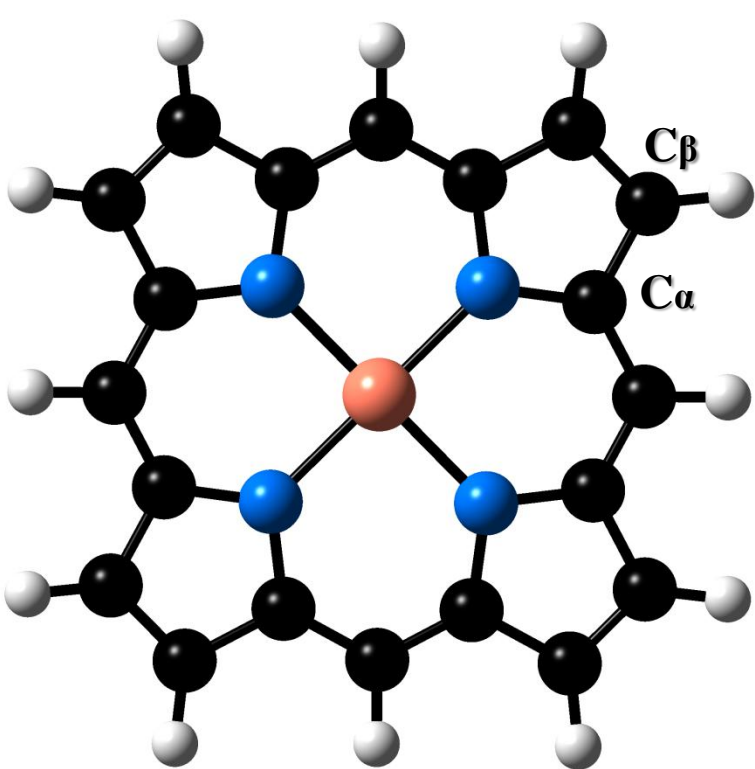

(c)

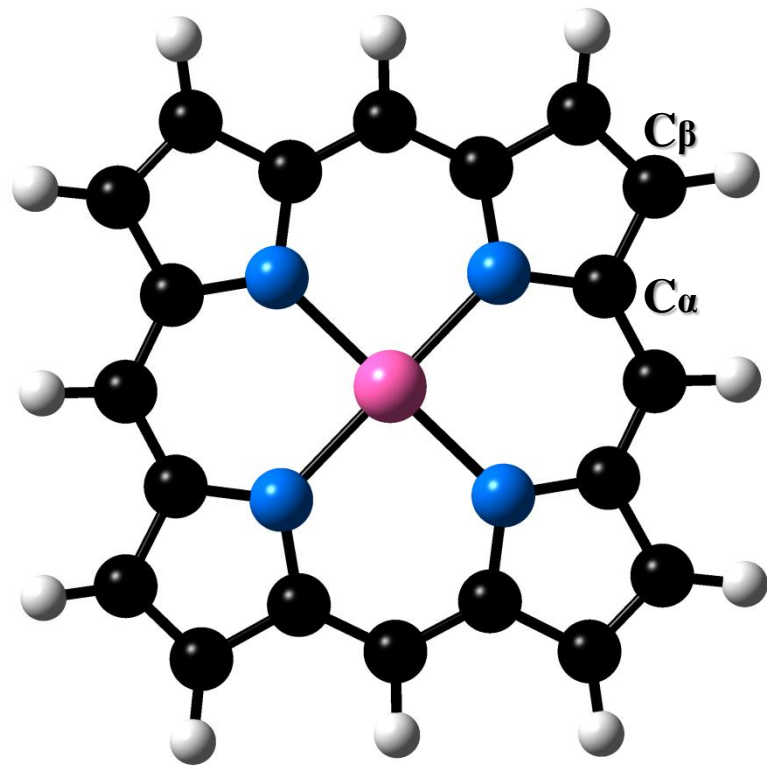

(d)

| H | C | N | Co | Ni | Cu | Zn |
|---|---|---|----|----|----|----|
|   |   |   |    |    |    |    |

Supplement: d0cp03279d2.zip [file d0cp03279d2.zip]

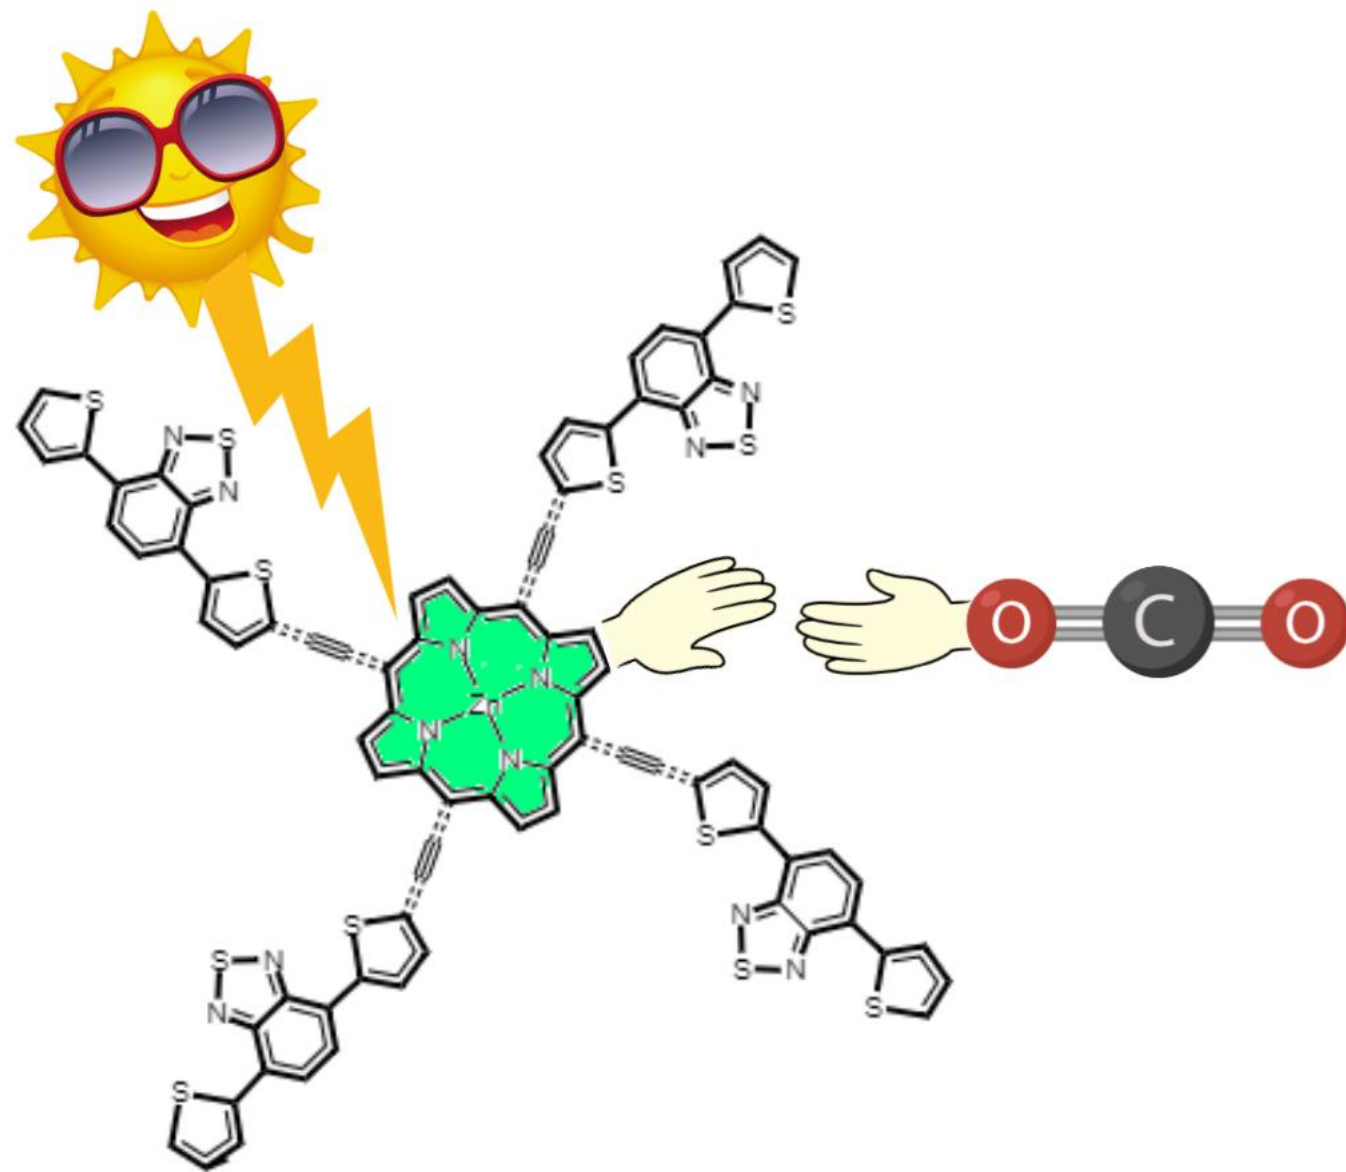

Supplement: d0cp03279d2.zip [file d0cp03279d2.zip]

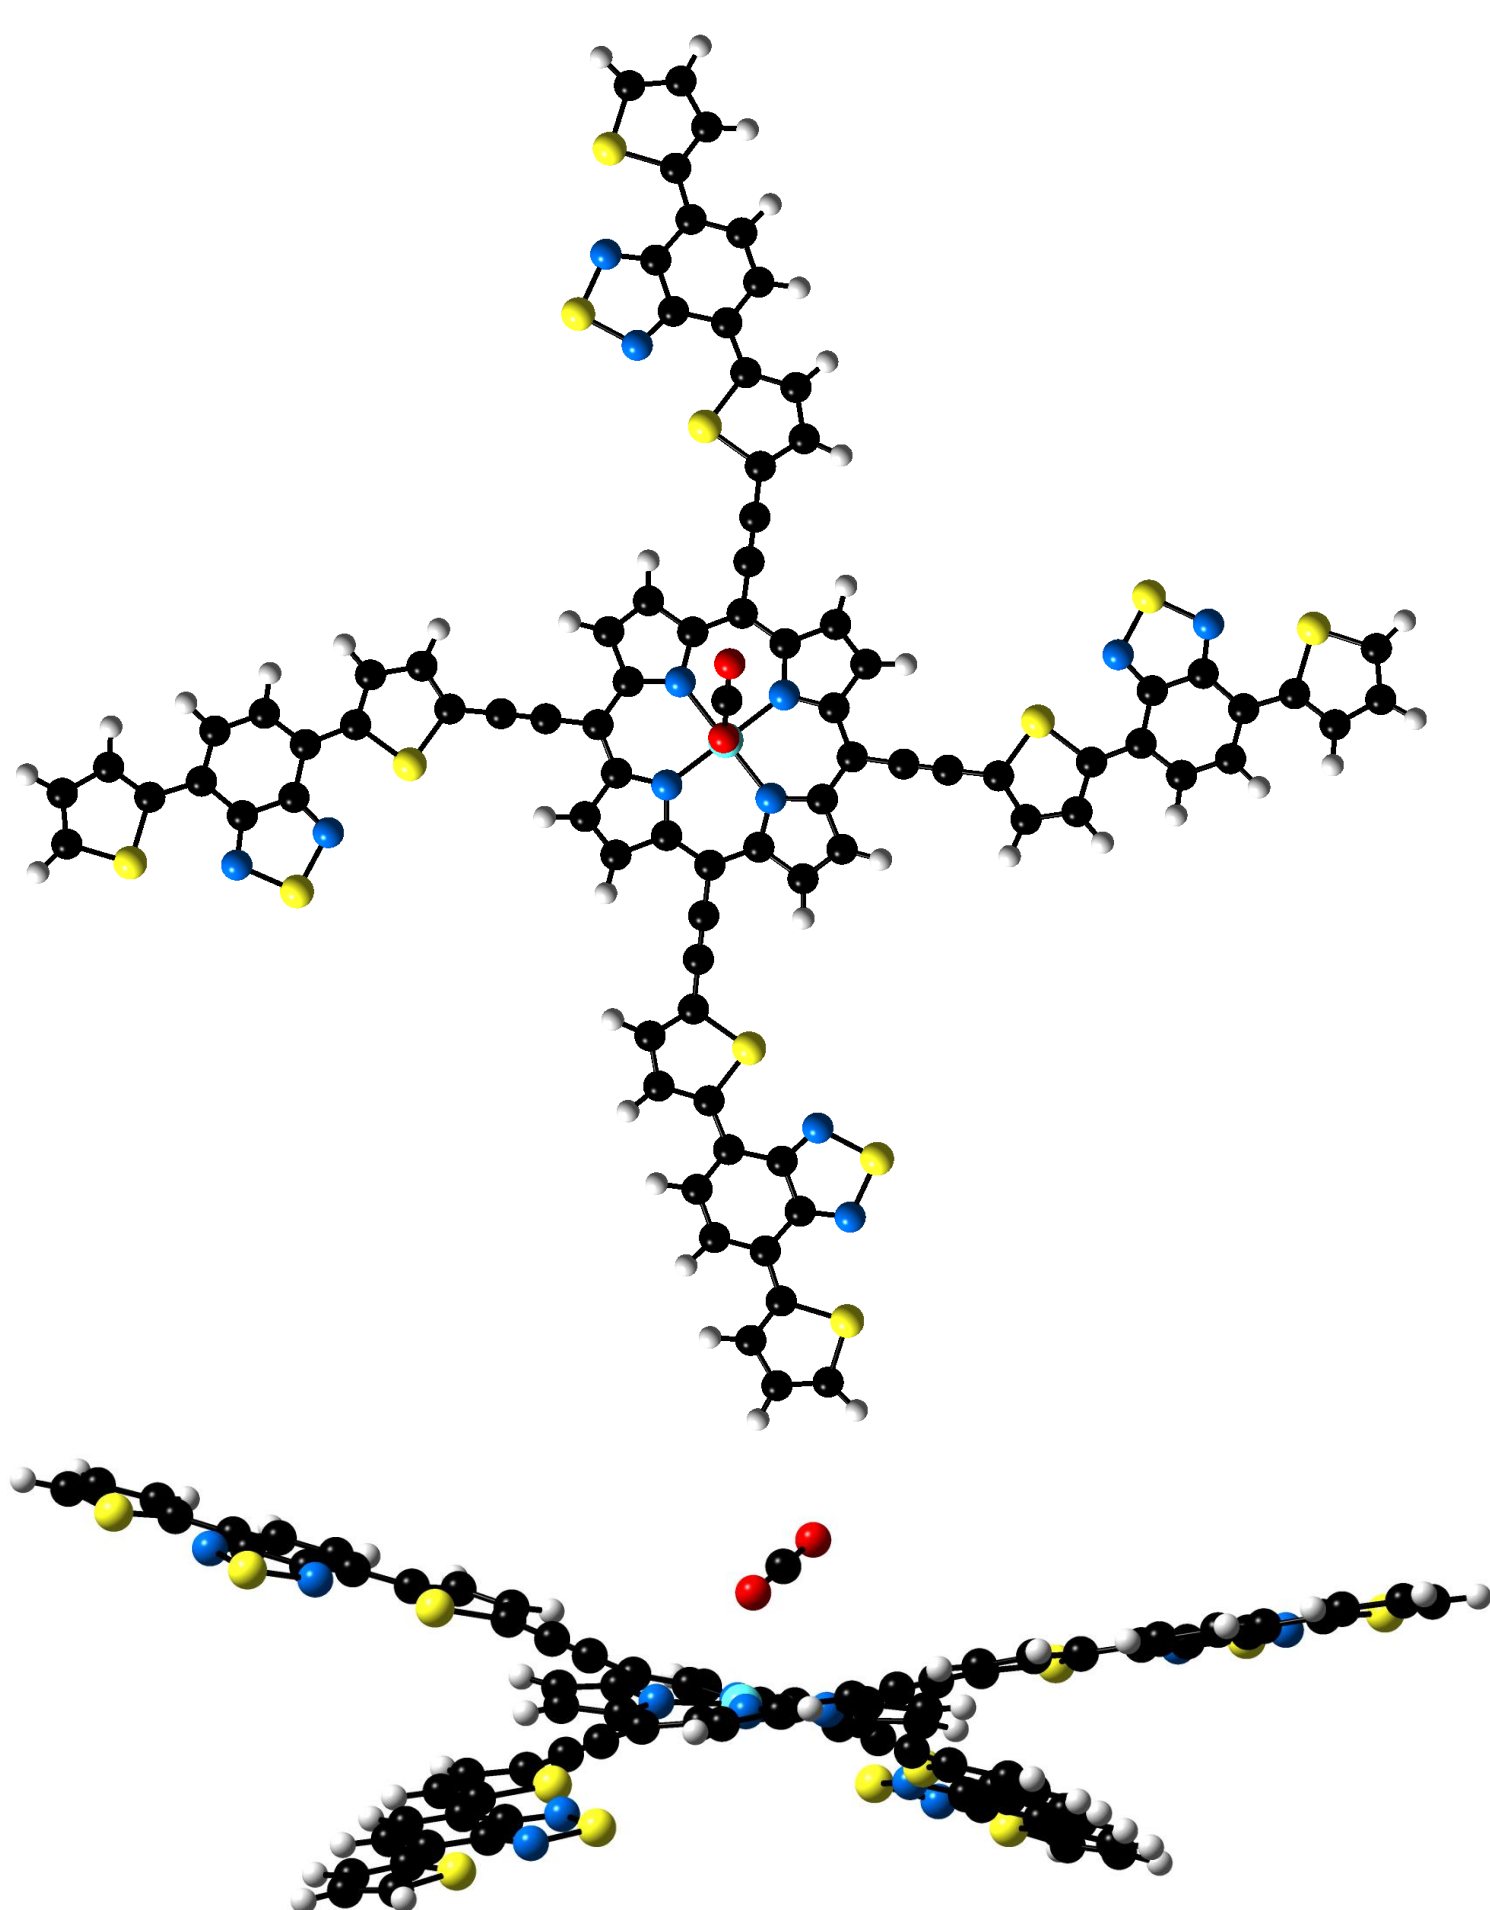

(a)

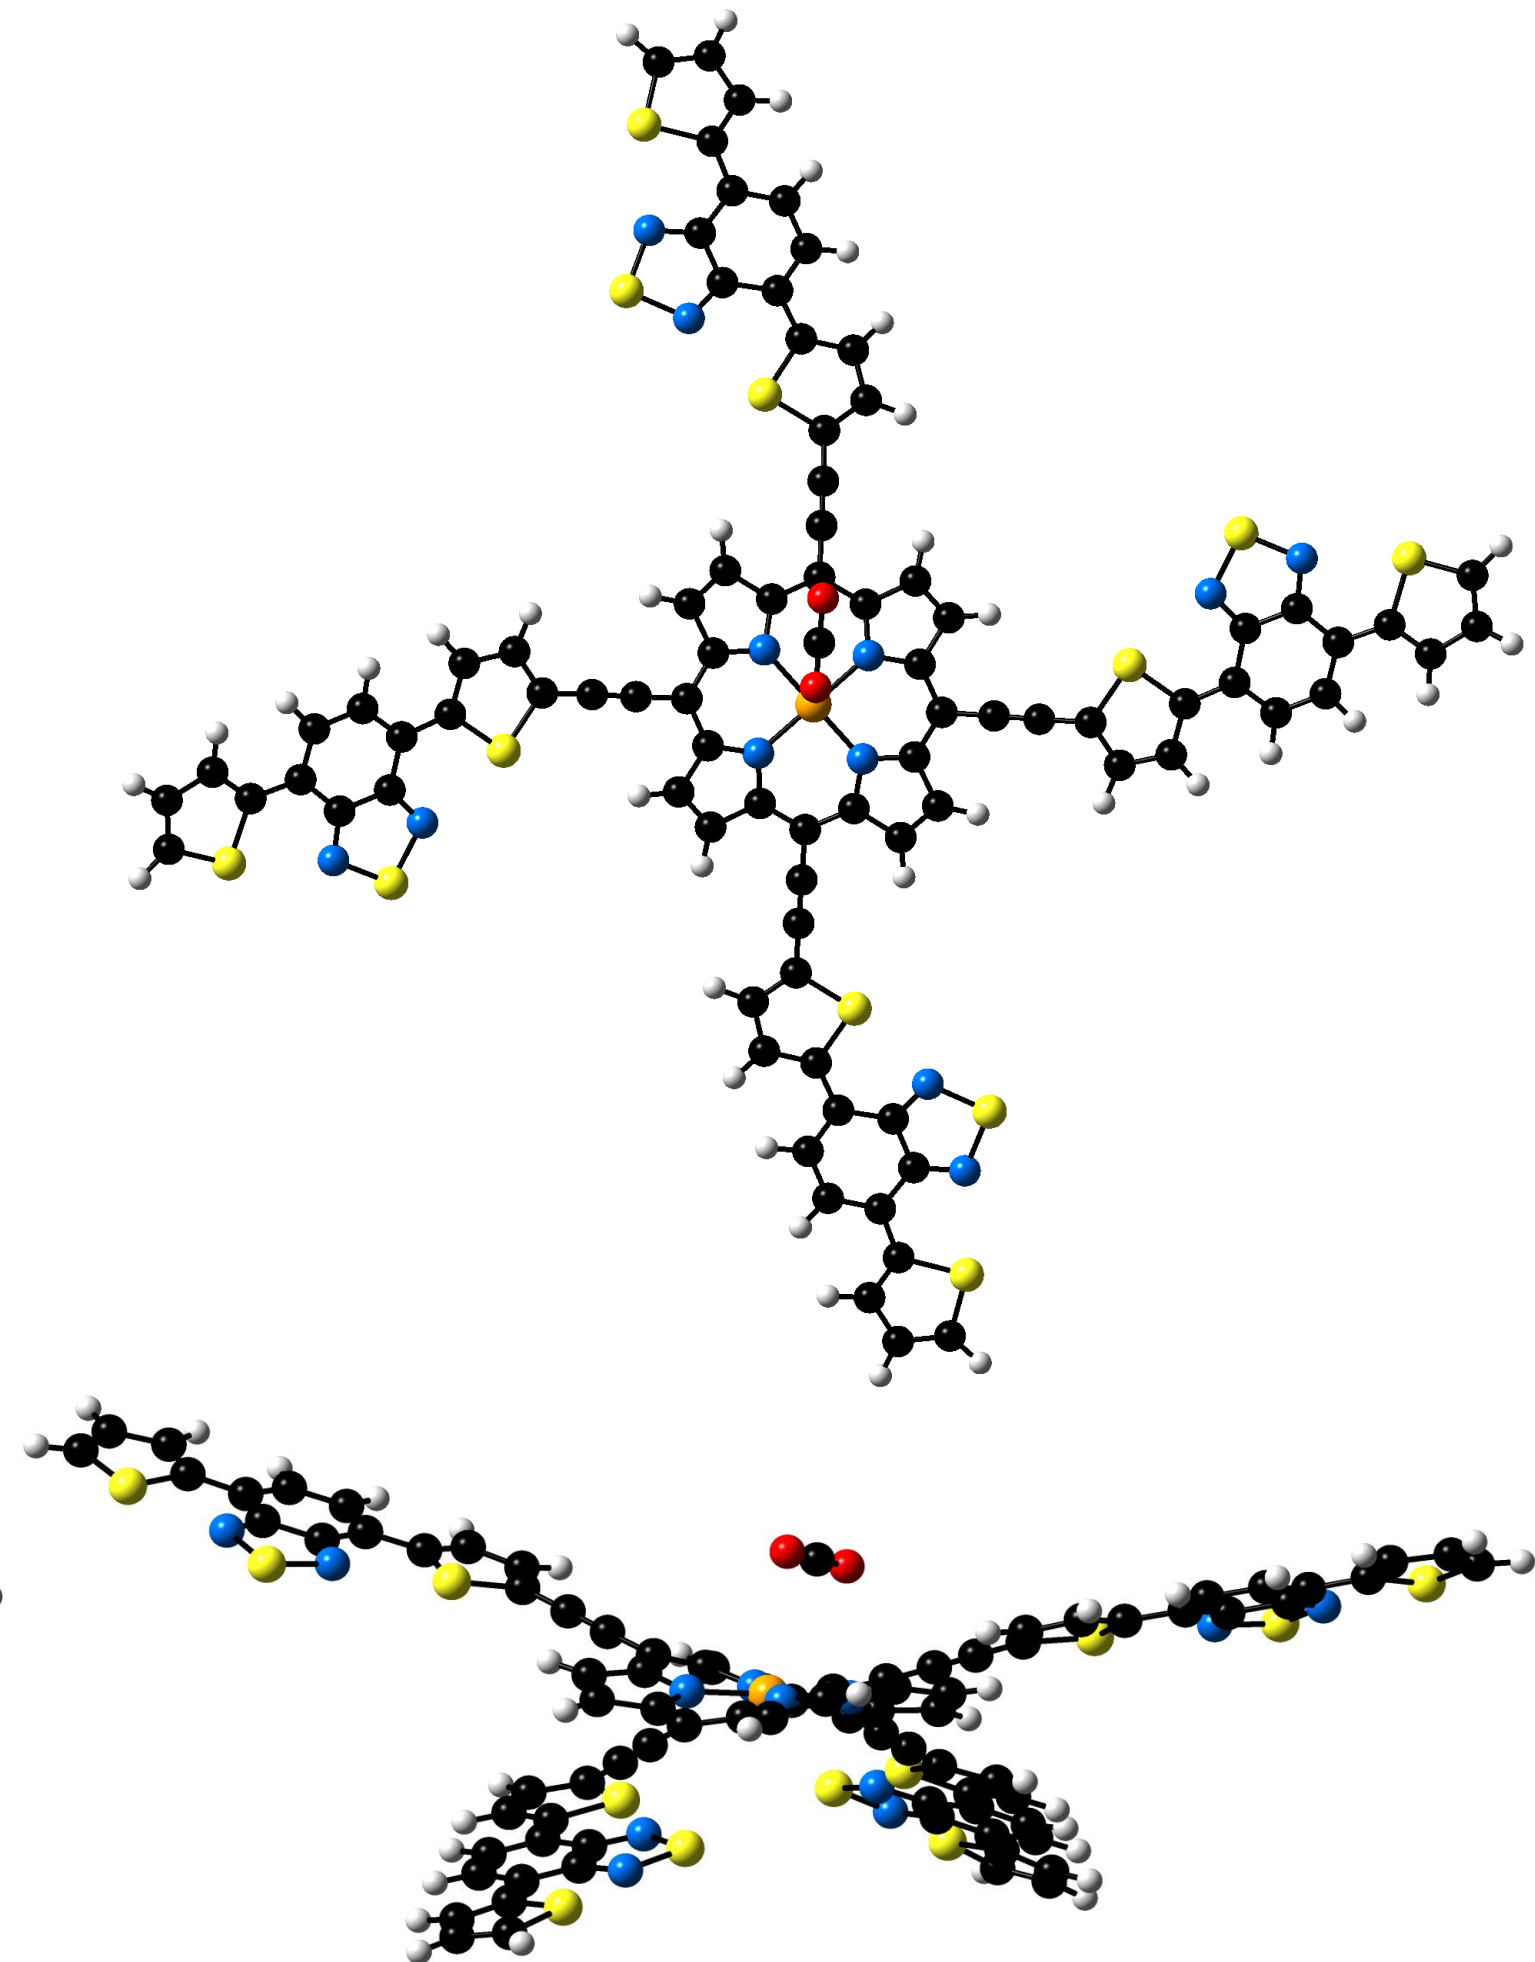

(b)

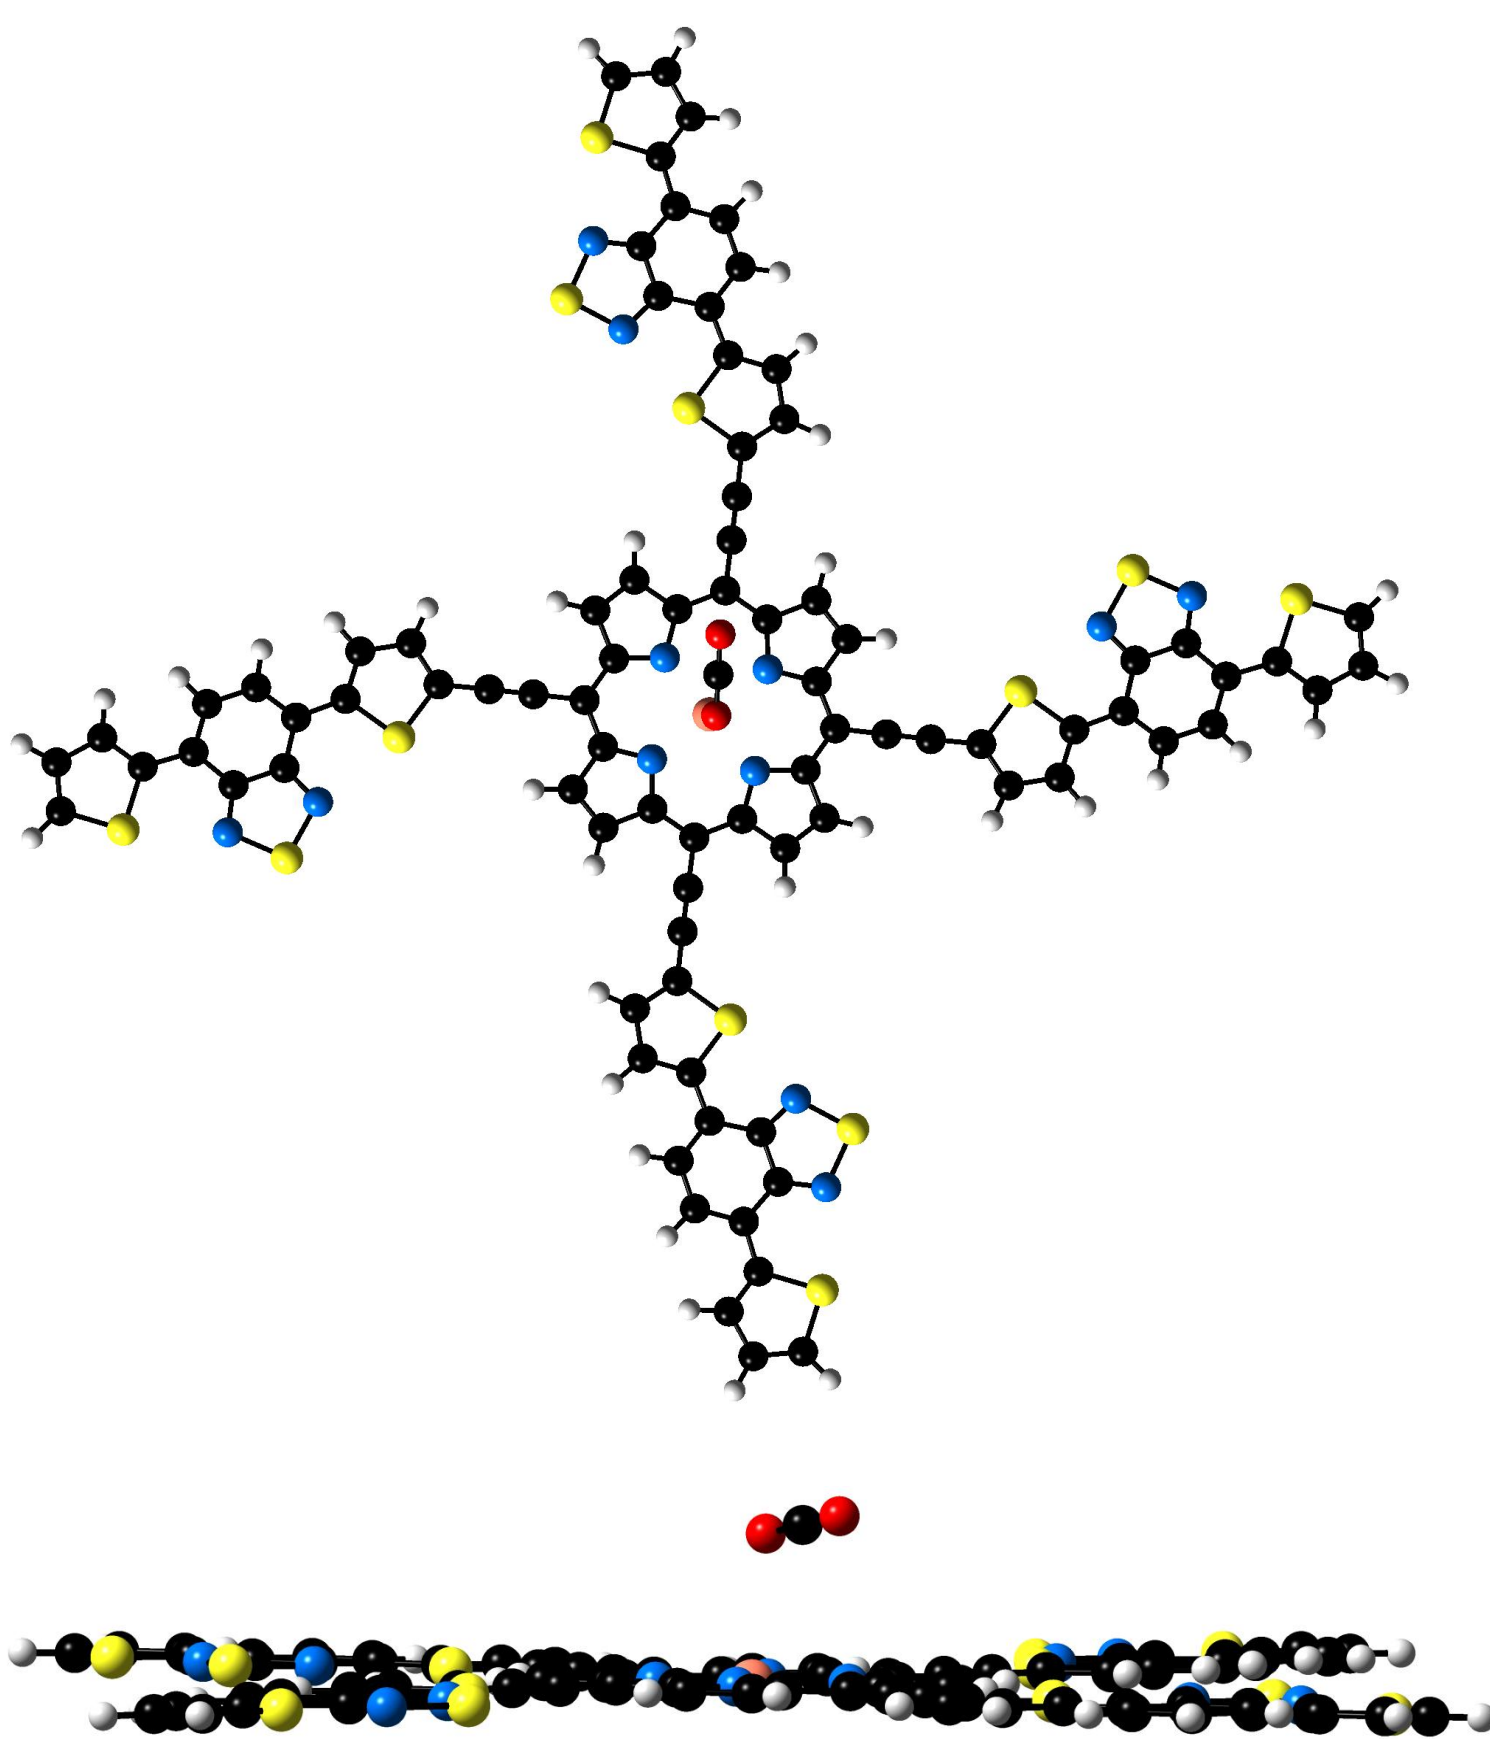

(c)

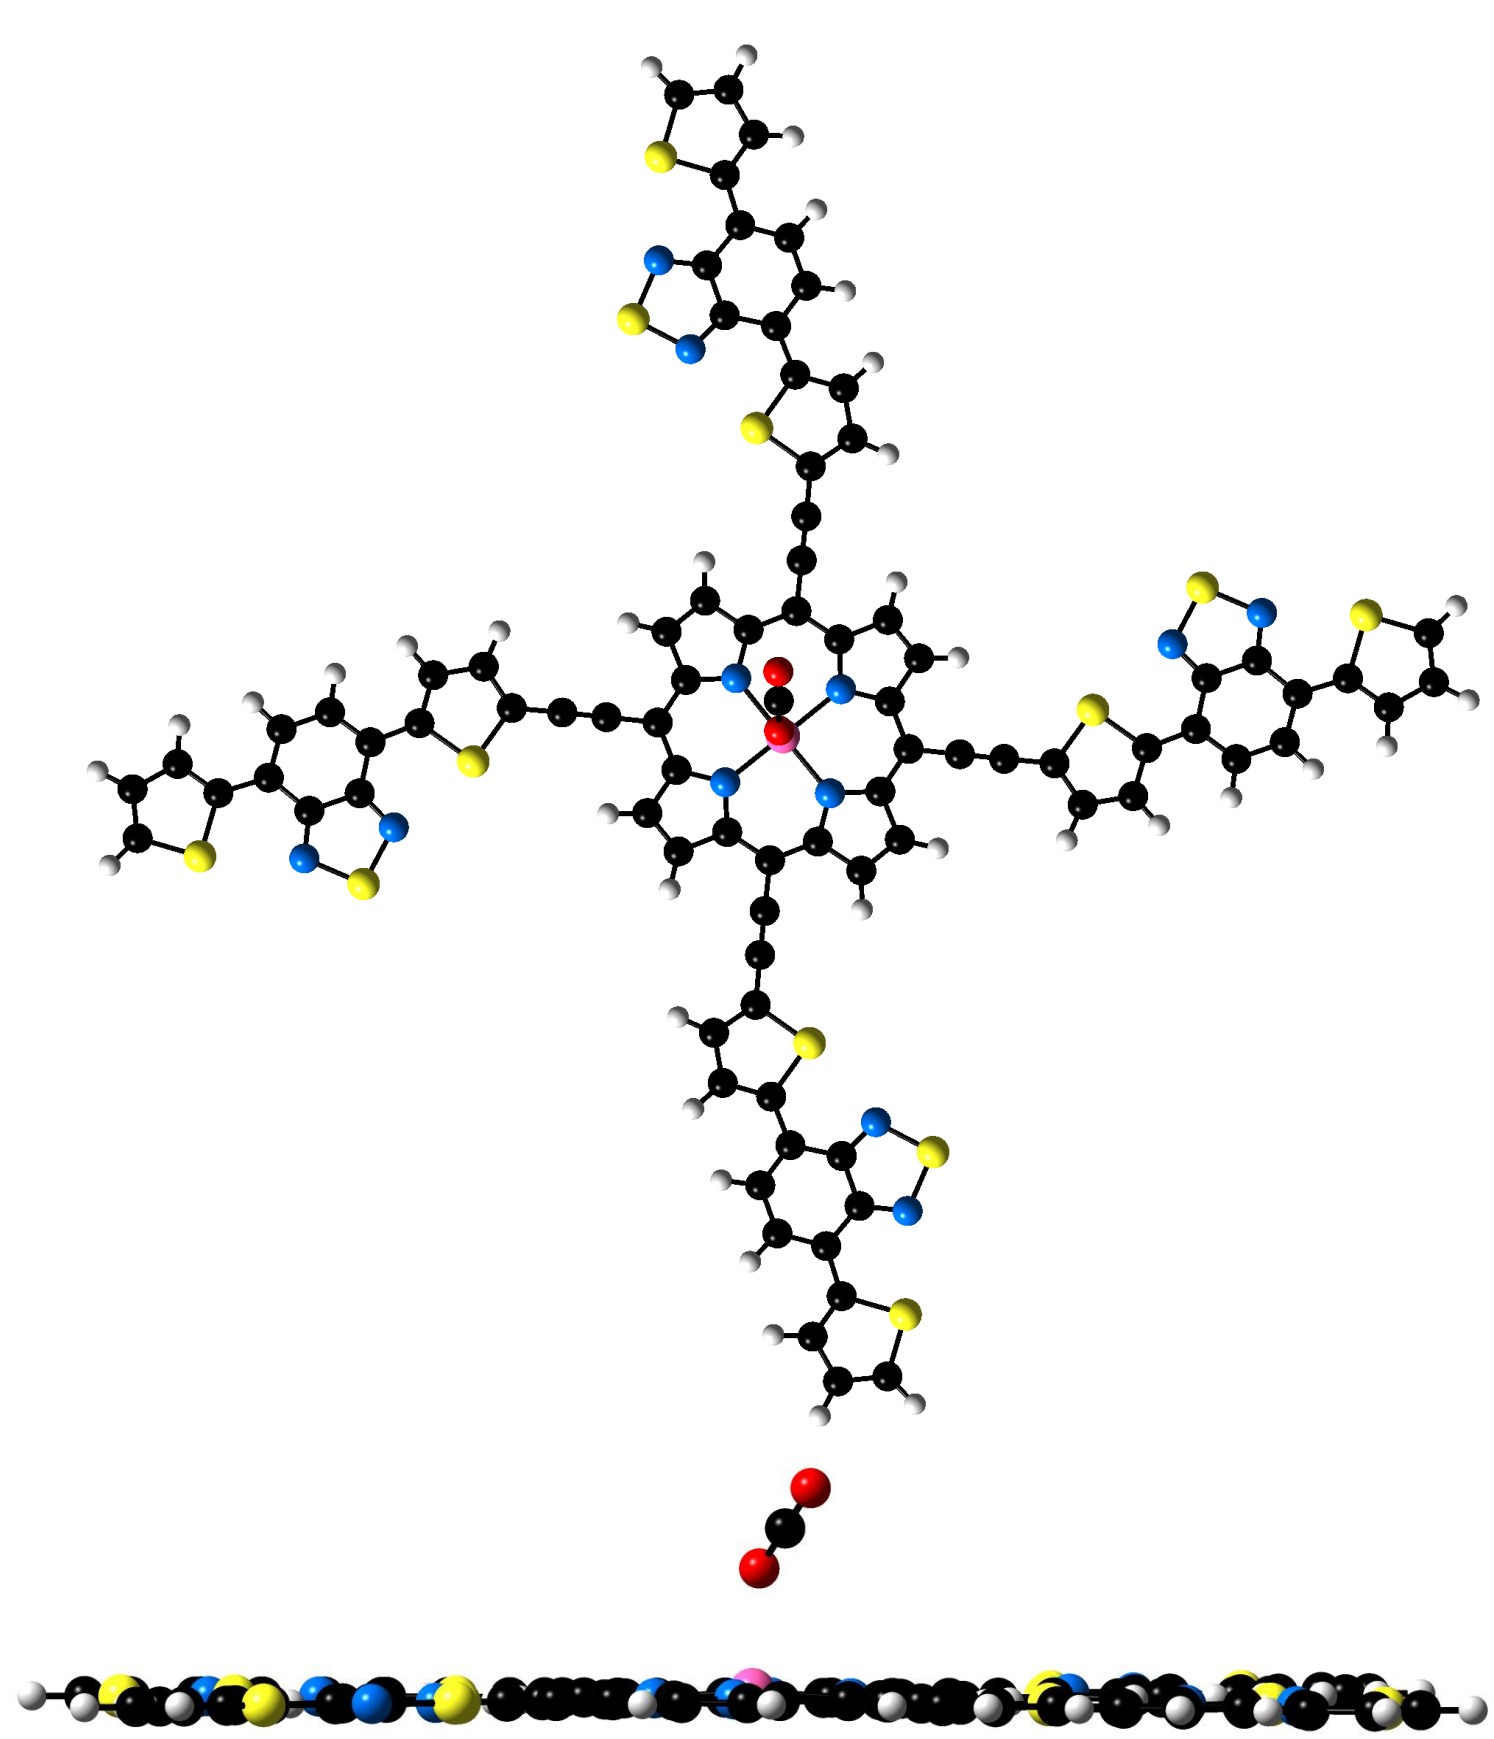

(d)

Supplement: d0cp03279d2.zip [file d0cp03279d2.zip]

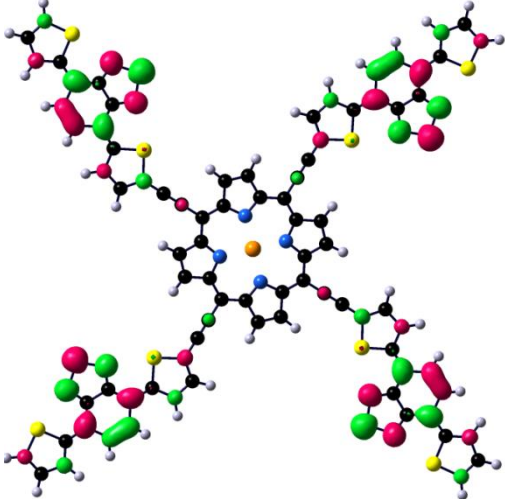

LUMO+2( $\alpha$ )

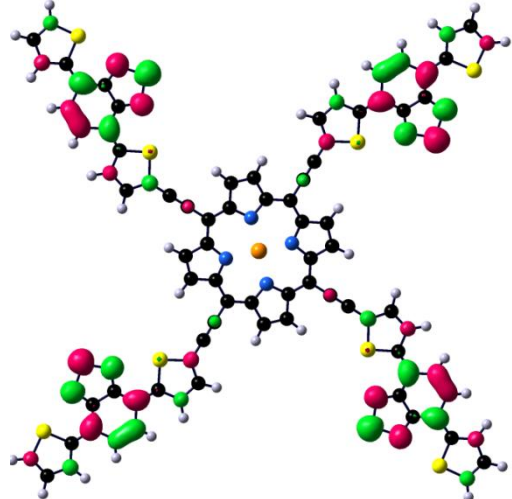

LUMO+2( $\beta$ )

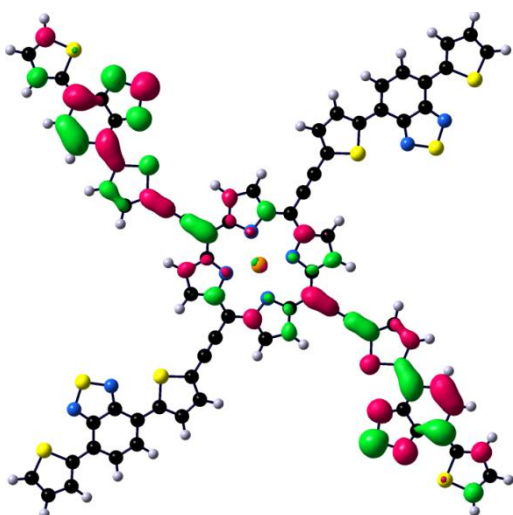

LUMO+1( $\alpha$ )

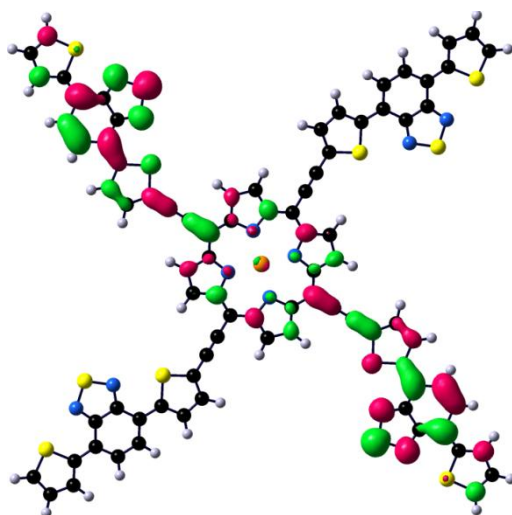

LUMO+1( $\beta$ )

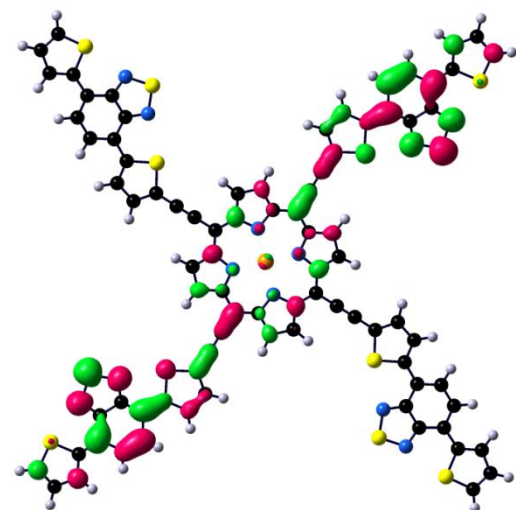

LUMO( $\alpha$ )

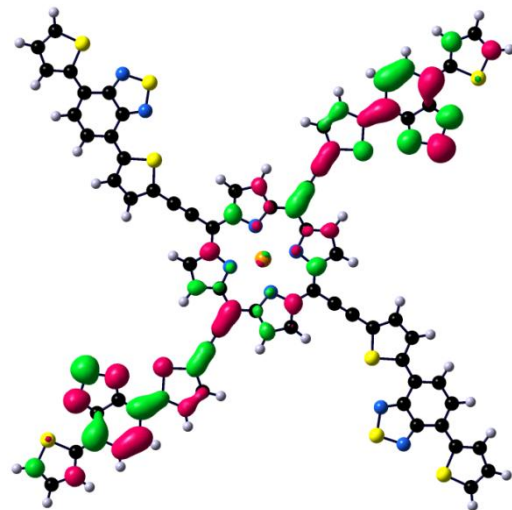

LUMO( $\beta$ )

Supplement: d0cp03279d2.zip [file d0cp03279d2.zip]

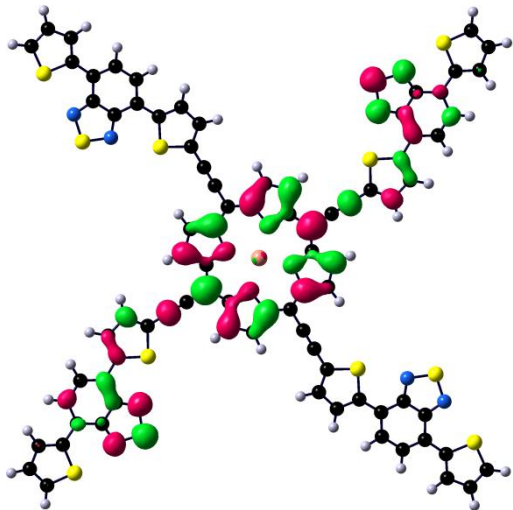

LUMO+5( $\alpha$ )

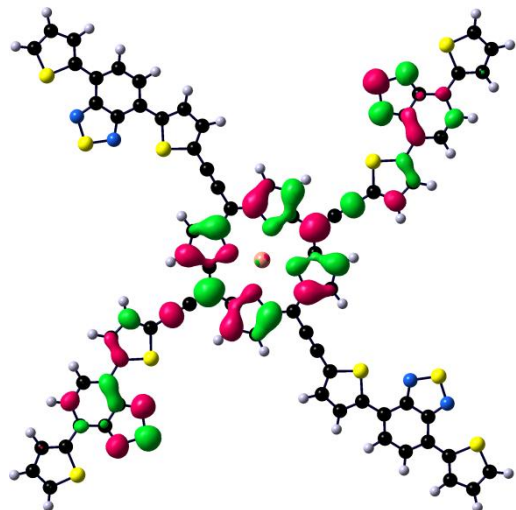

LUMO+5( $\beta$ )

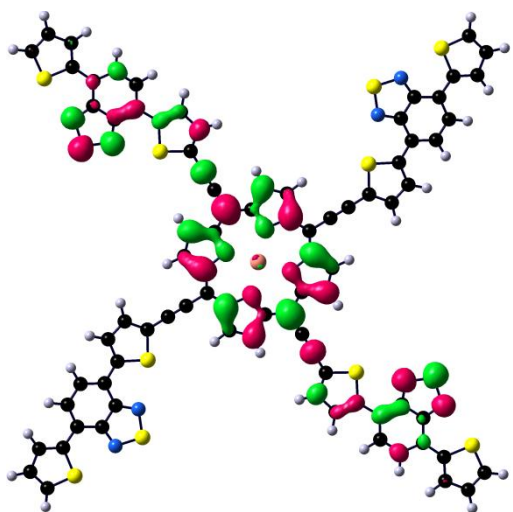

LUMO+4( $\alpha$ )

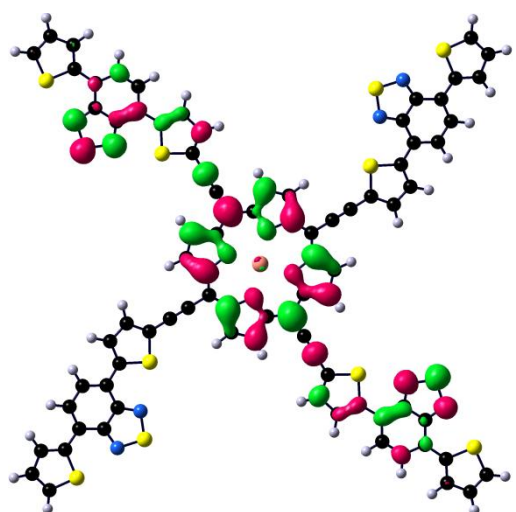

LUMO+4( $\beta$ )

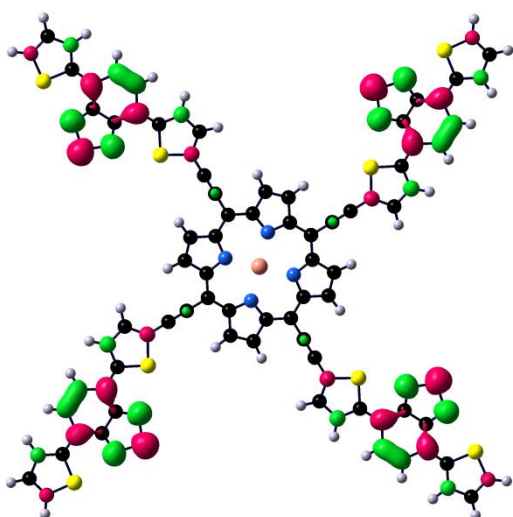

LUMO+3( $\alpha$ )

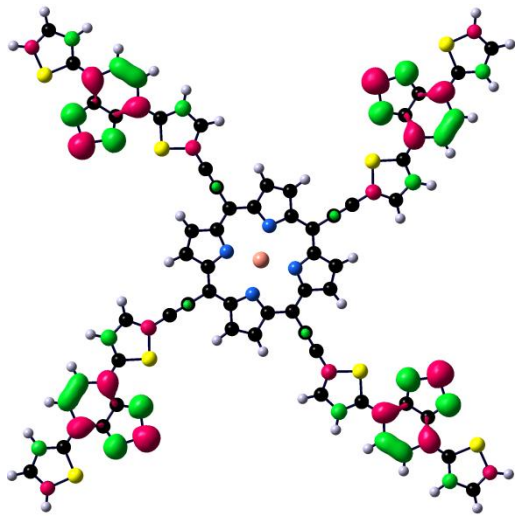

LUMO+3( $\beta$ )

Supplement: d0cp03279d2.zip [file d0cp03279d2.zip]

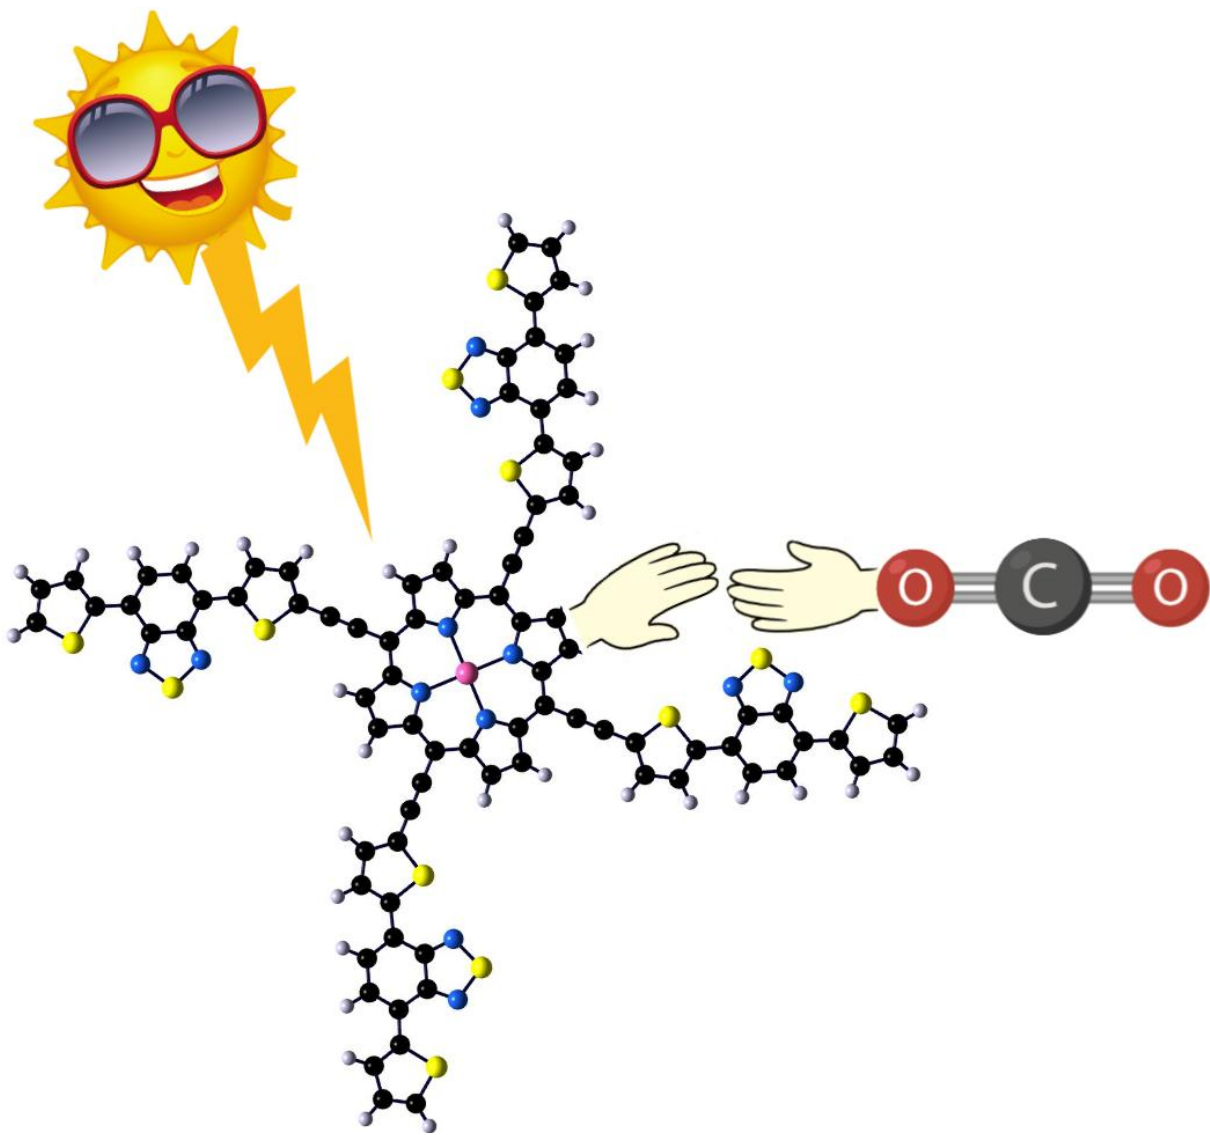

Supplement: d0cp03279d2.zip [file d0cp03279d2.zip]

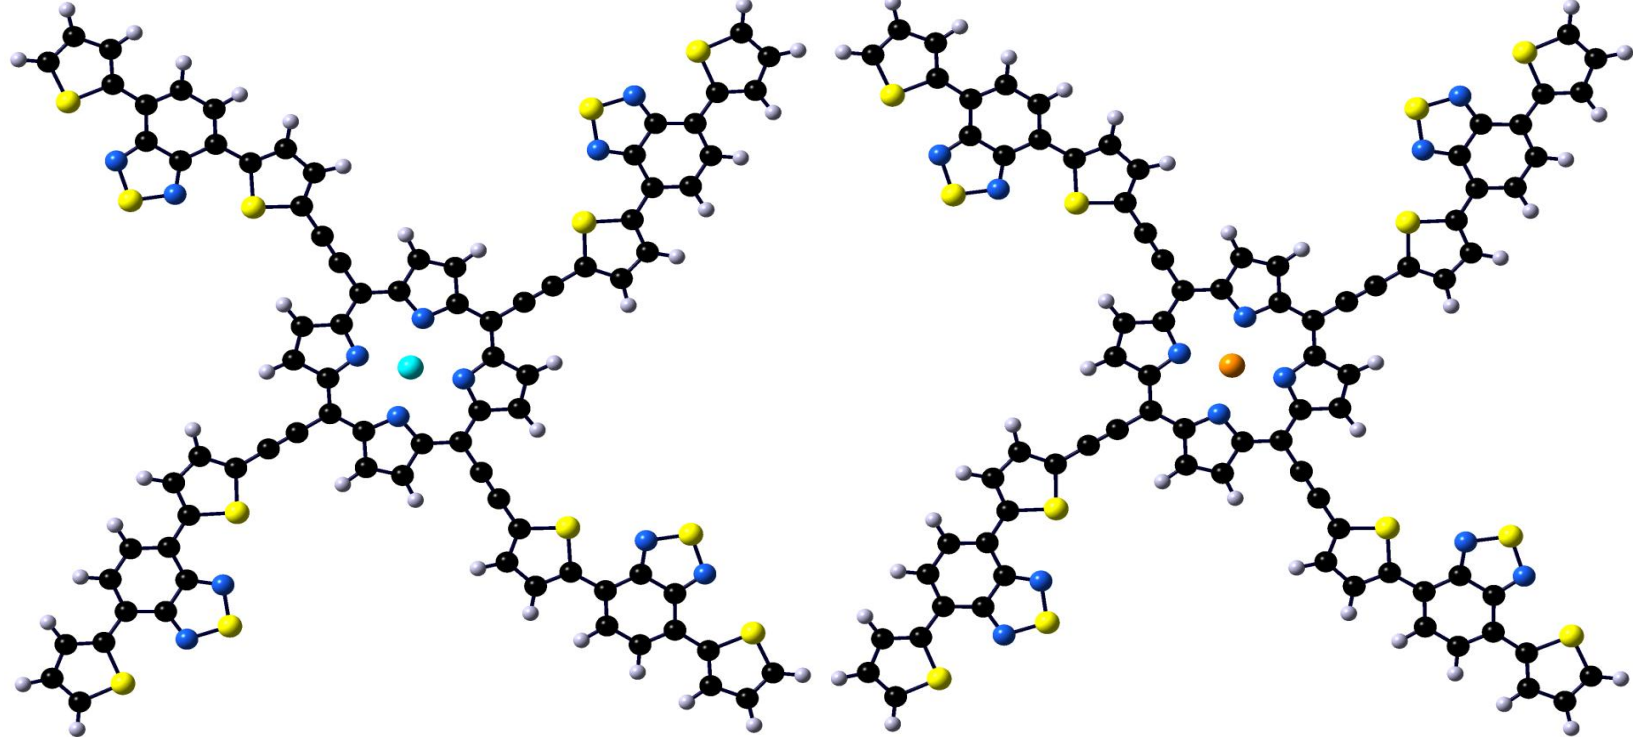

(a)

(b)

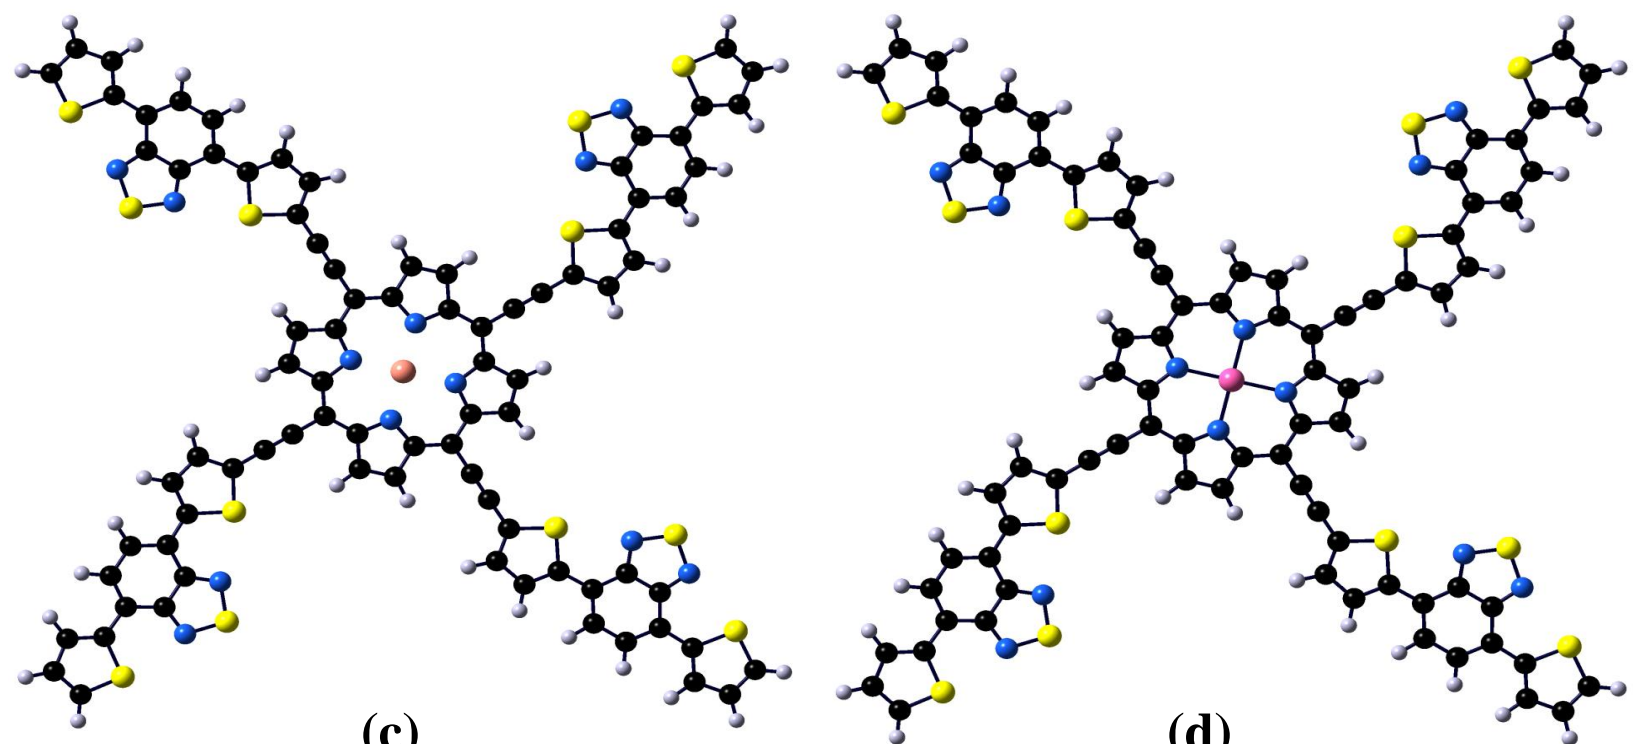

(c)

(d)

| H                                                                                   | C                                                                                   | N                                                                                   | S                                                                                   | Co                                                                                  | Ni                                                                                  | Cu                                                                                    | Zn                                                                                    |
|-------------------------------------------------------------------------------------|-------------------------------------------------------------------------------------|-------------------------------------------------------------------------------------|-------------------------------------------------------------------------------------|-------------------------------------------------------------------------------------|-------------------------------------------------------------------------------------|---------------------------------------------------------------------------------------|---------------------------------------------------------------------------------------|
|  |  |  |  |  |  |  |  |

Supplement: d0cp03279d2.zip [file d0cp03279d2.zip]

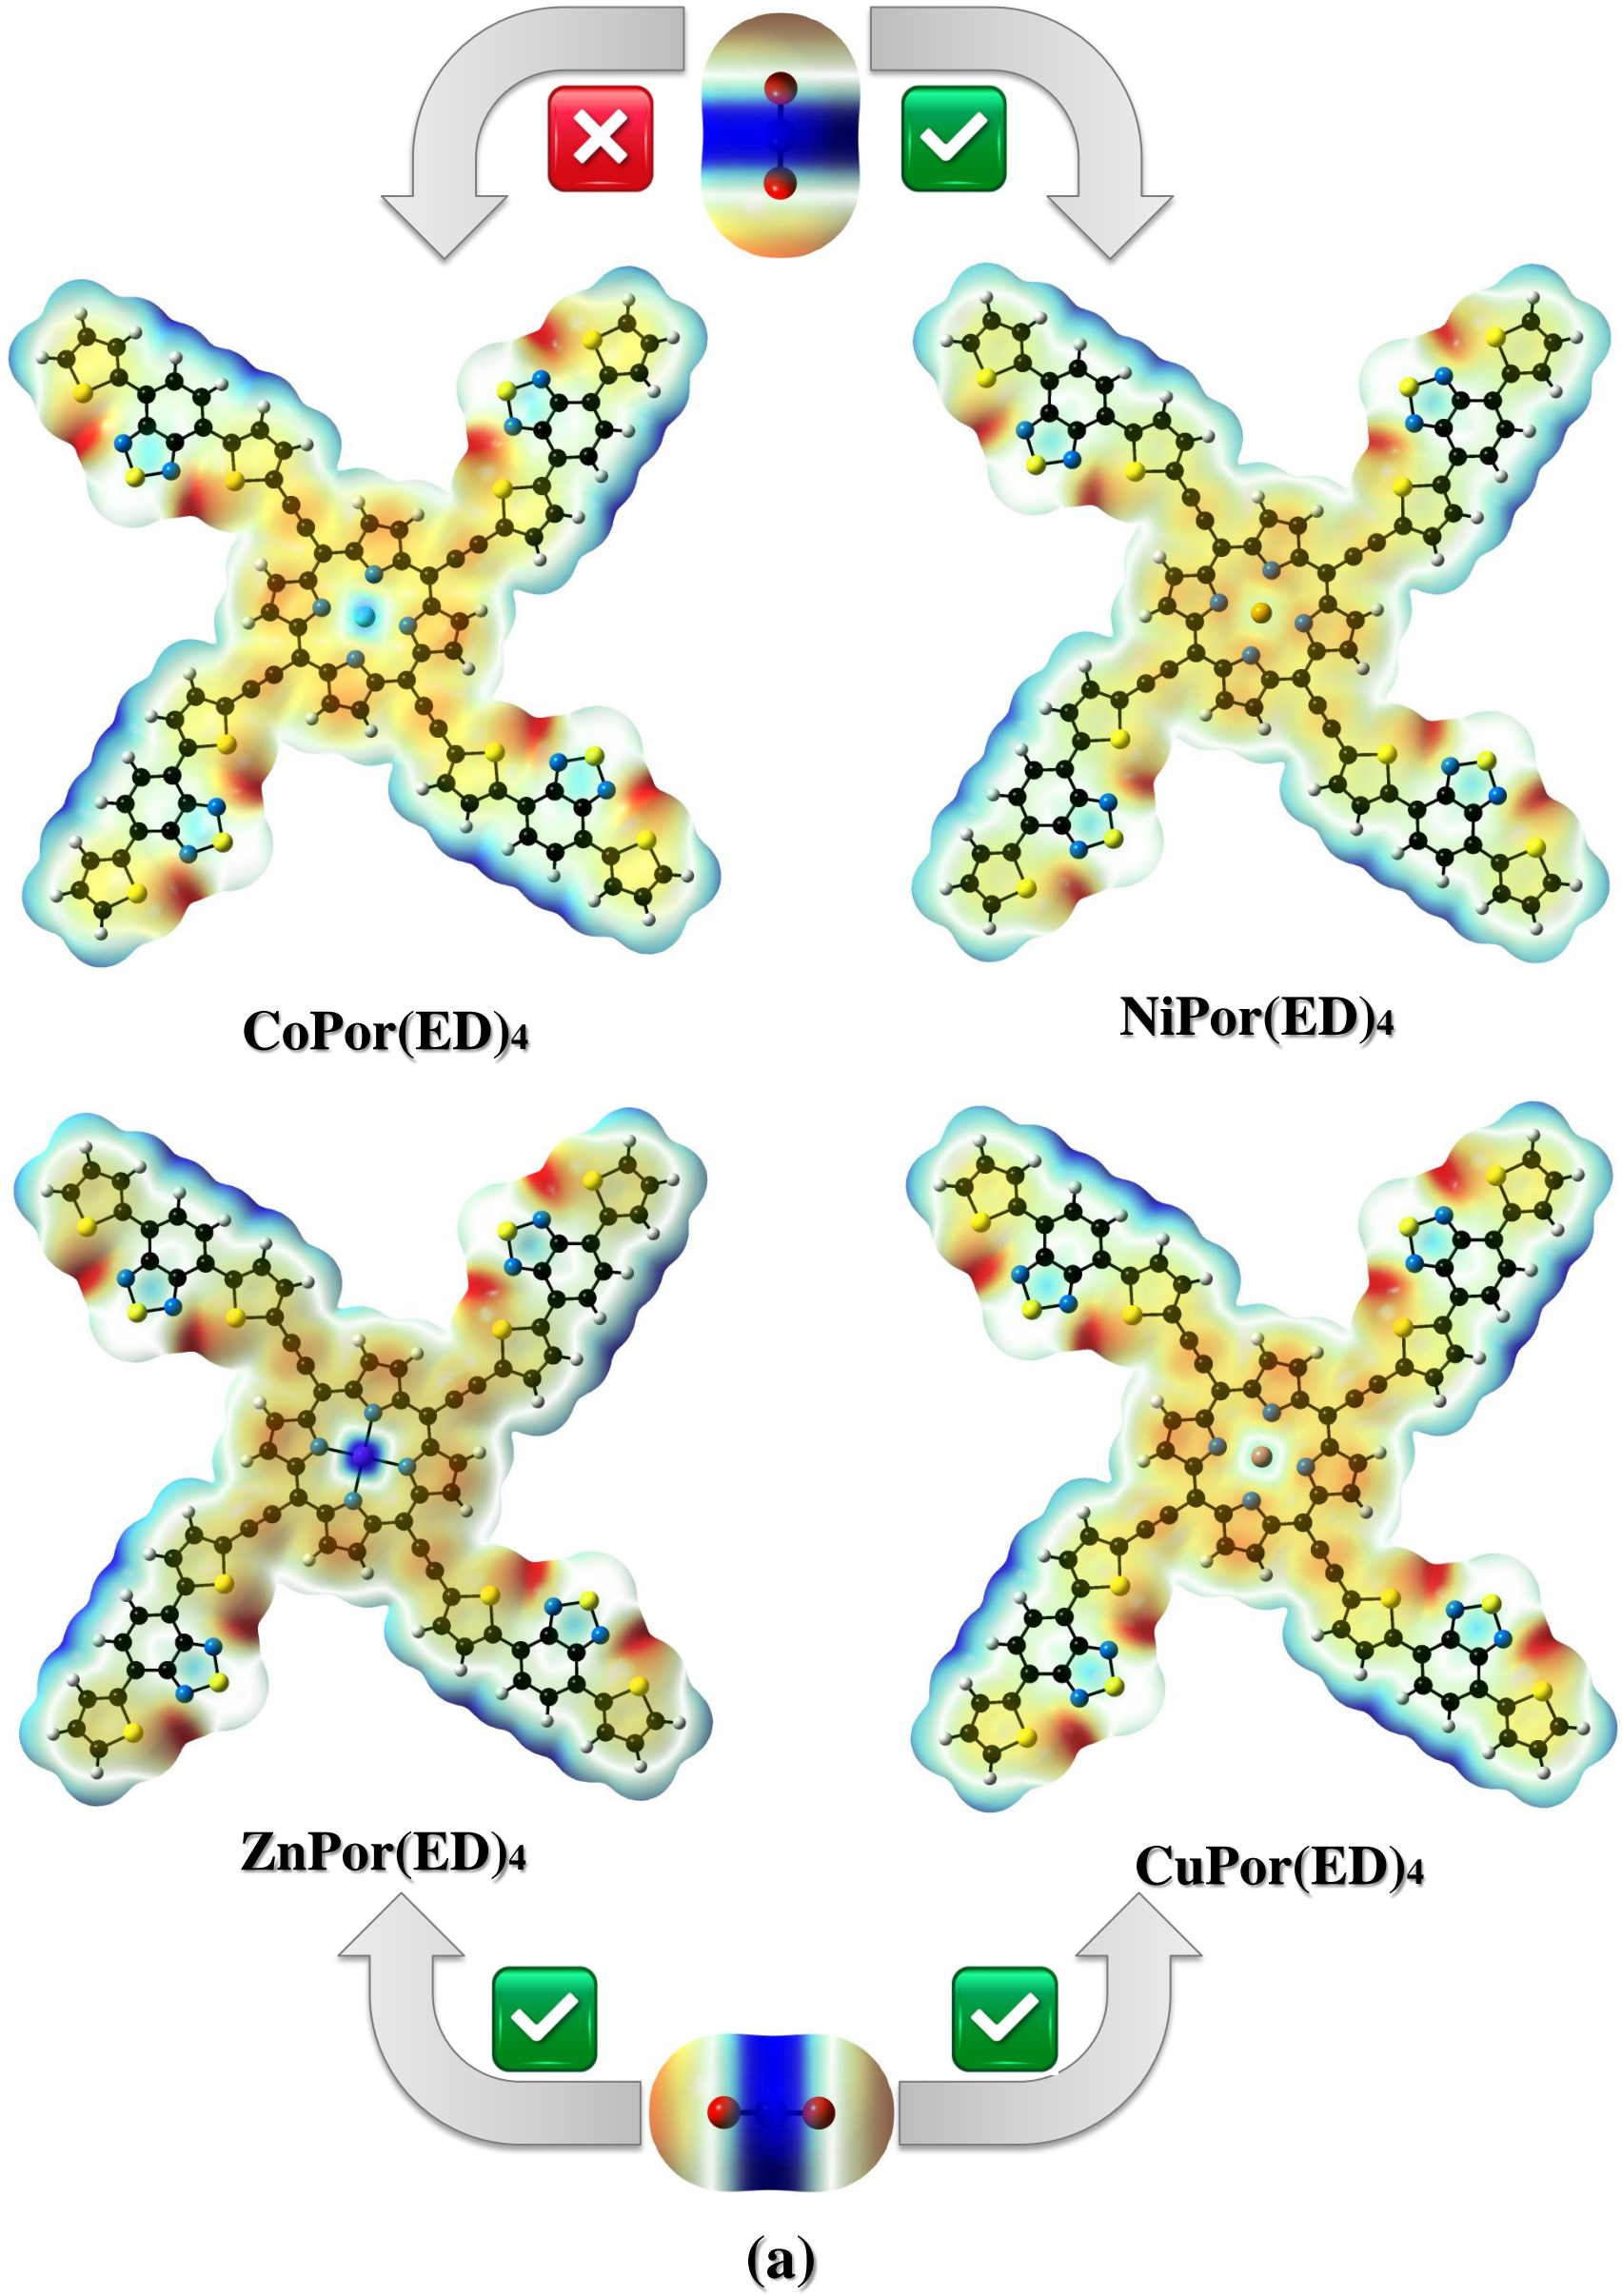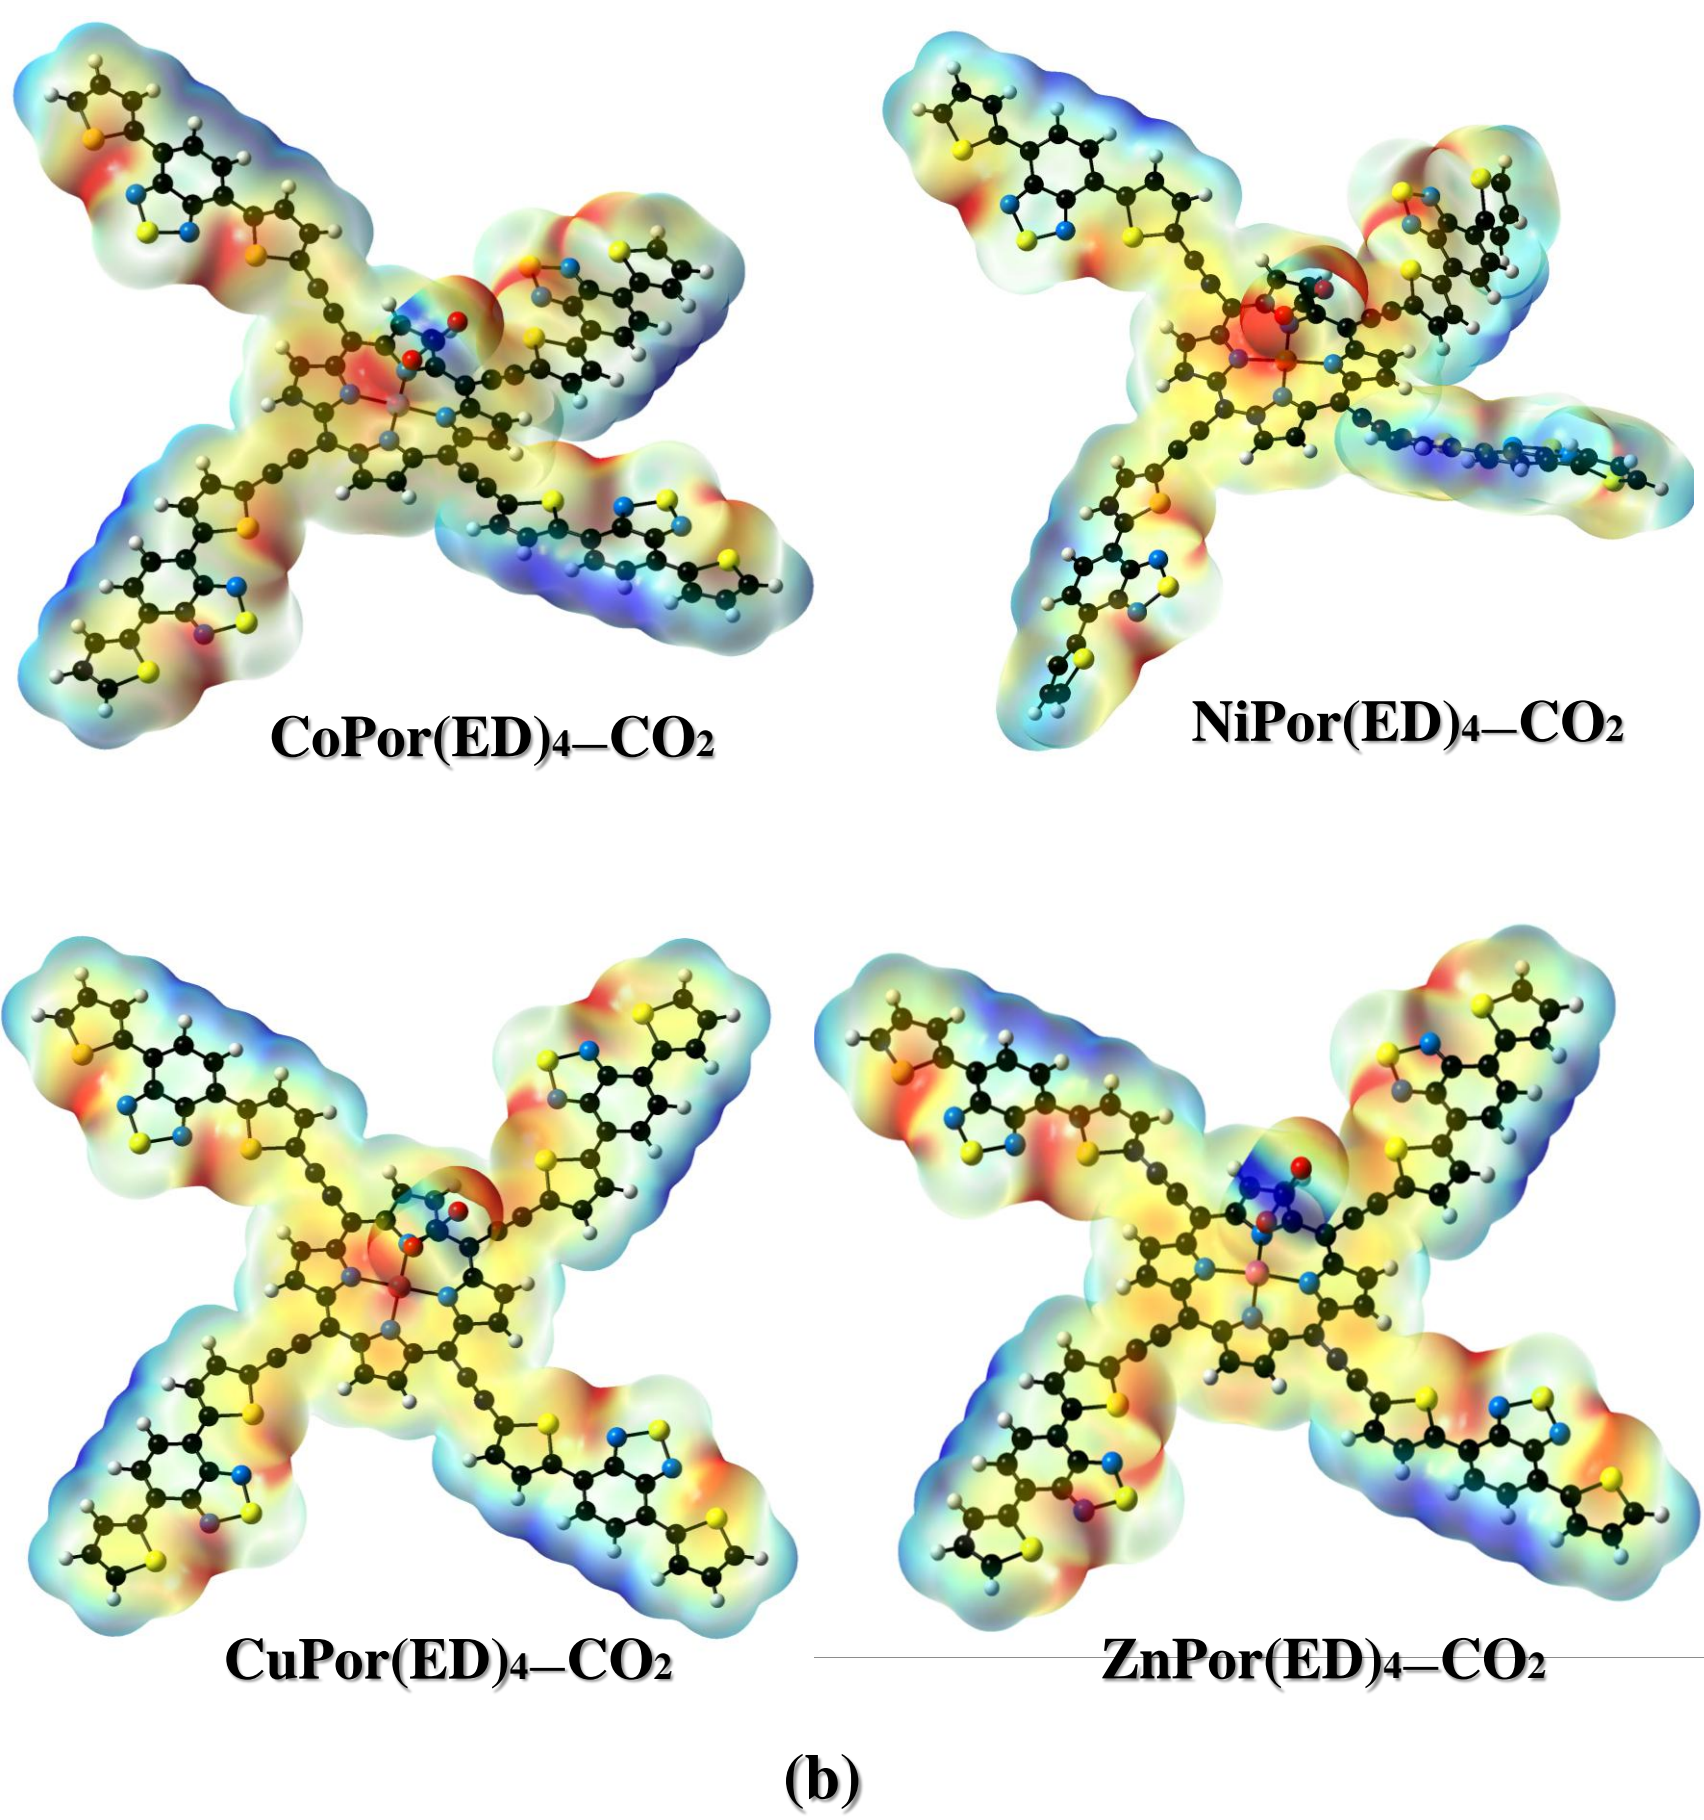

Supplement: d0cp03279d2.zip [file d0cp03279d2.zip]

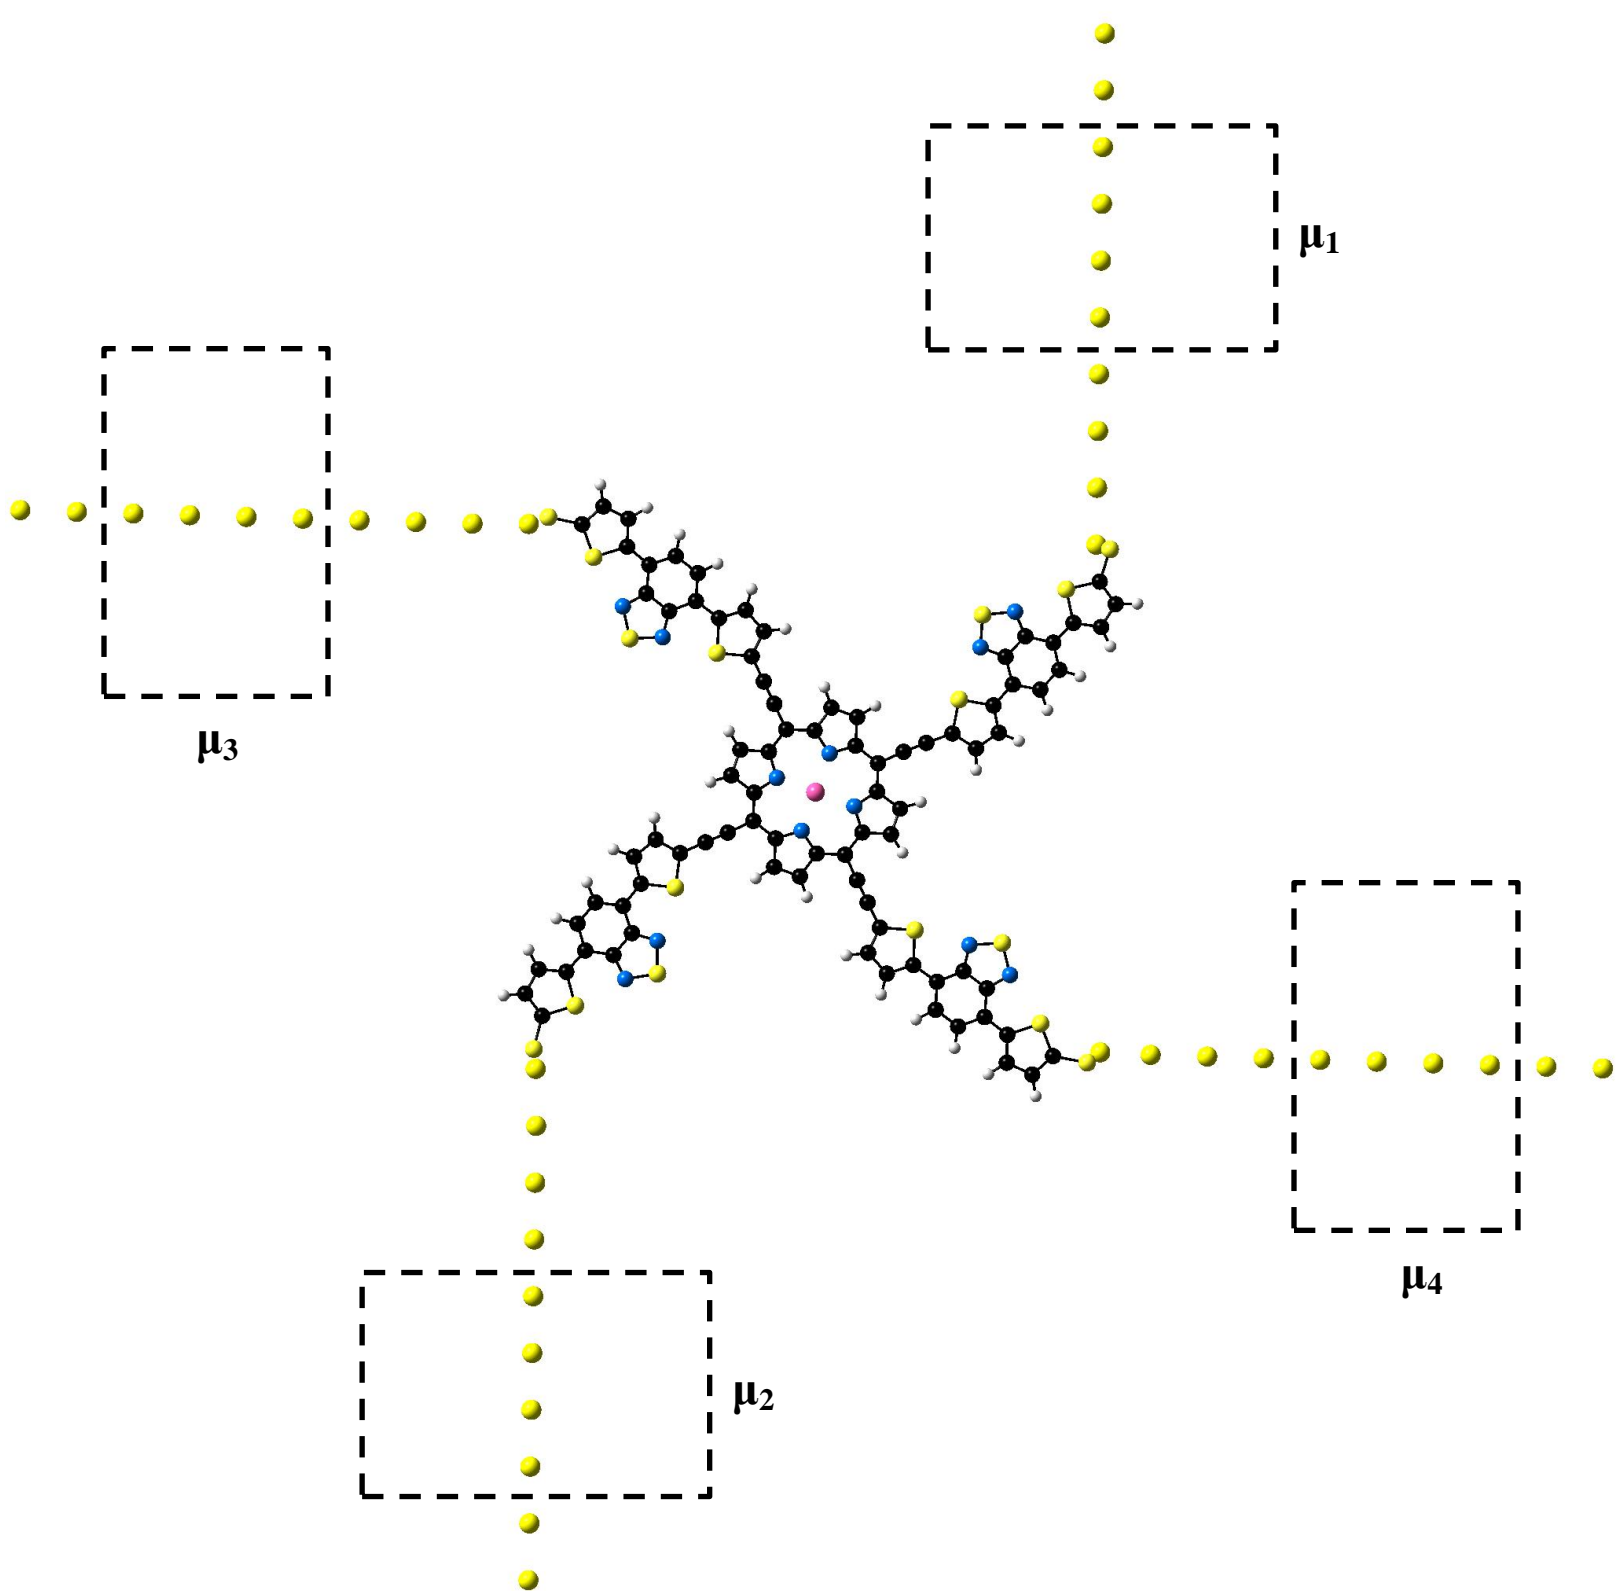

Supplement: d0cp03279d2.zip [file d0cp03279d2.zip]

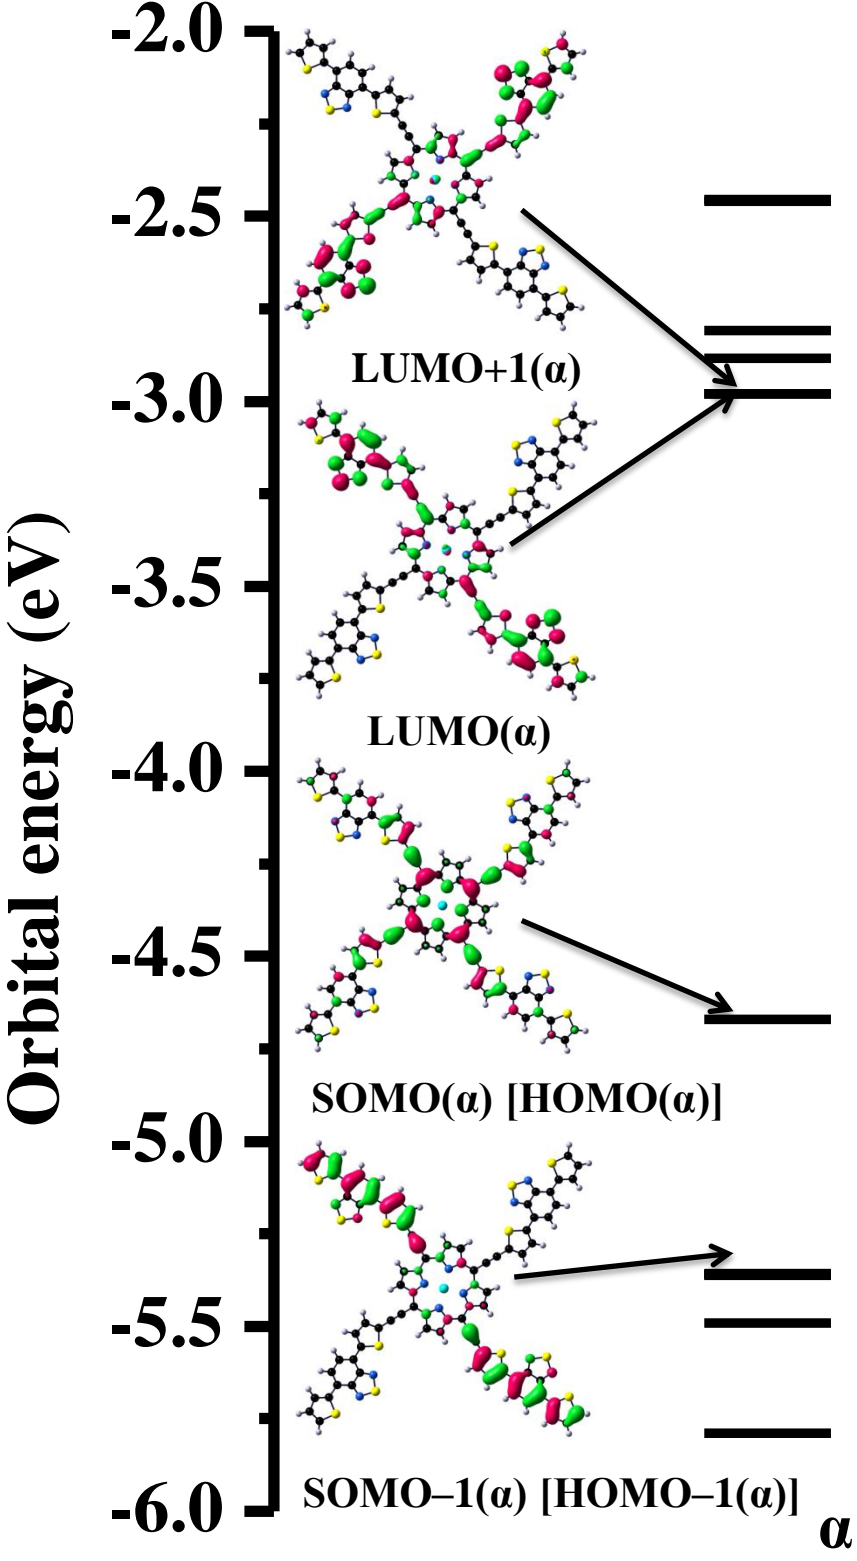

(a)

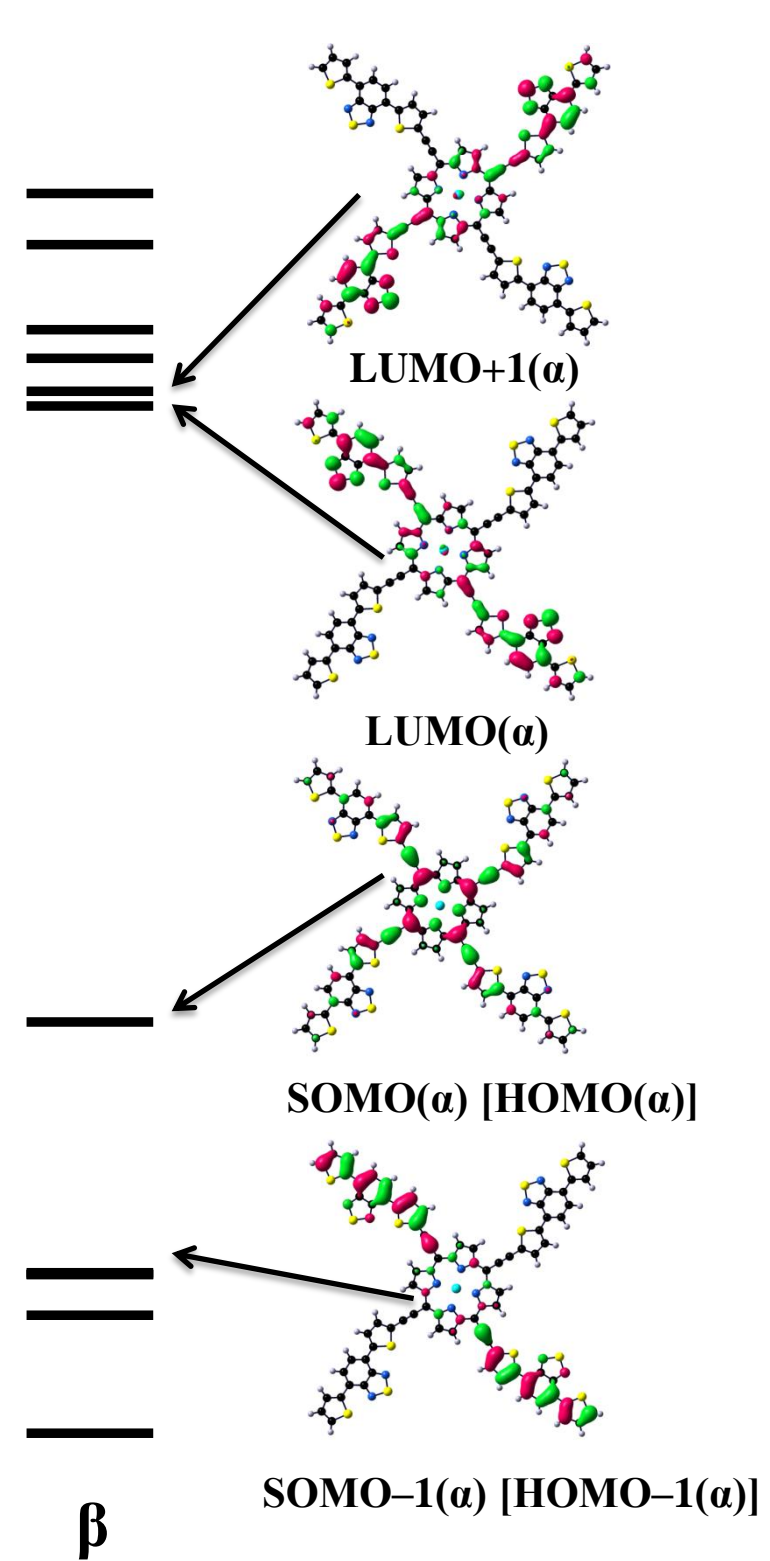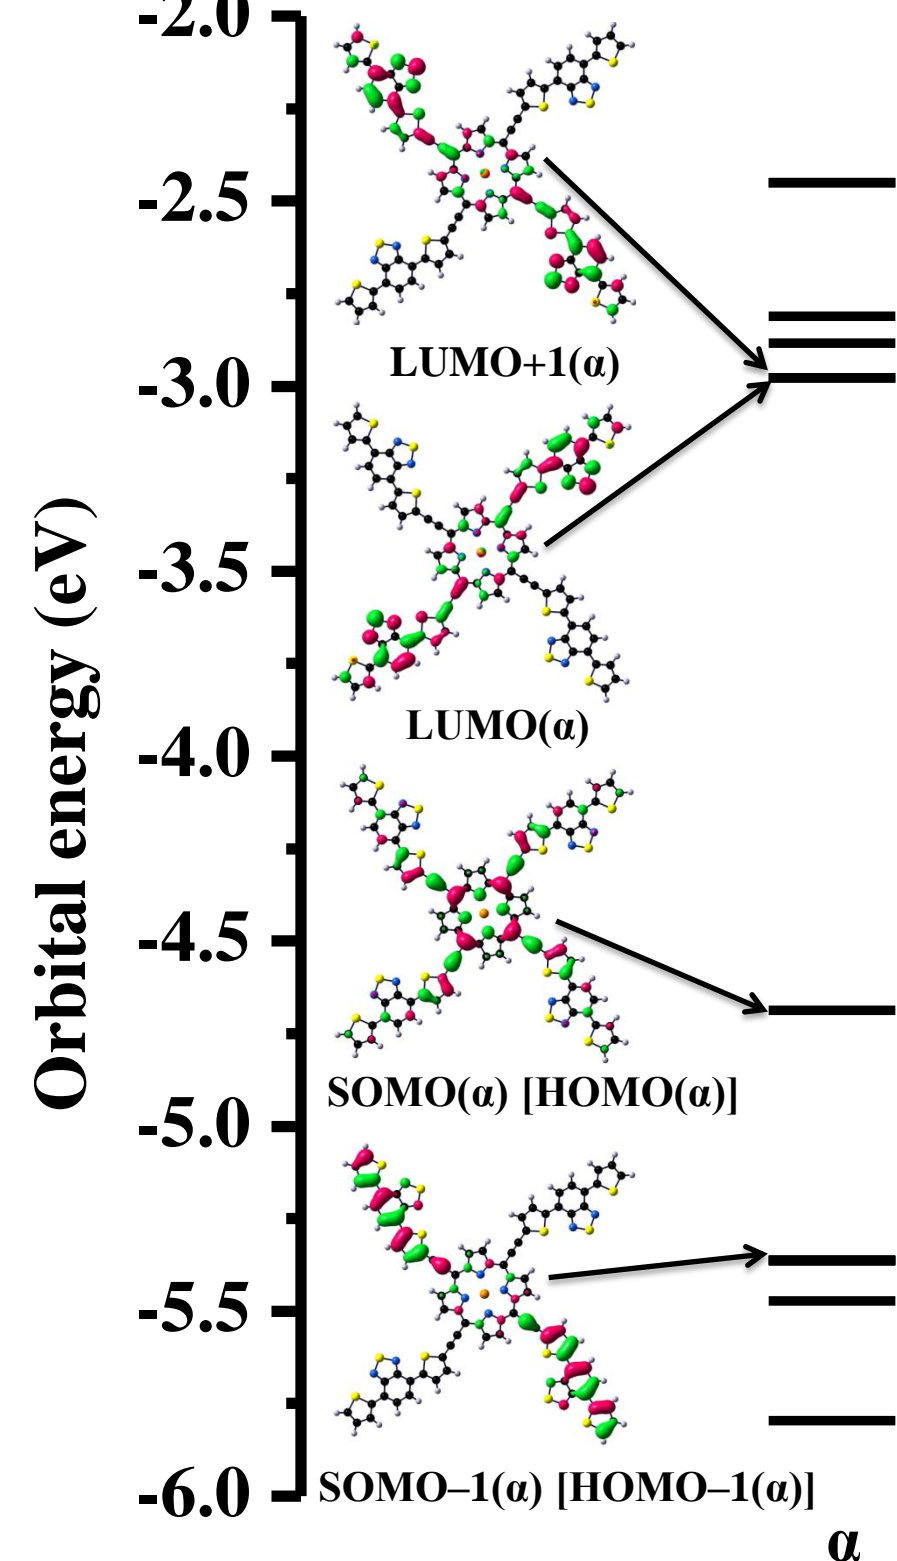

(b)

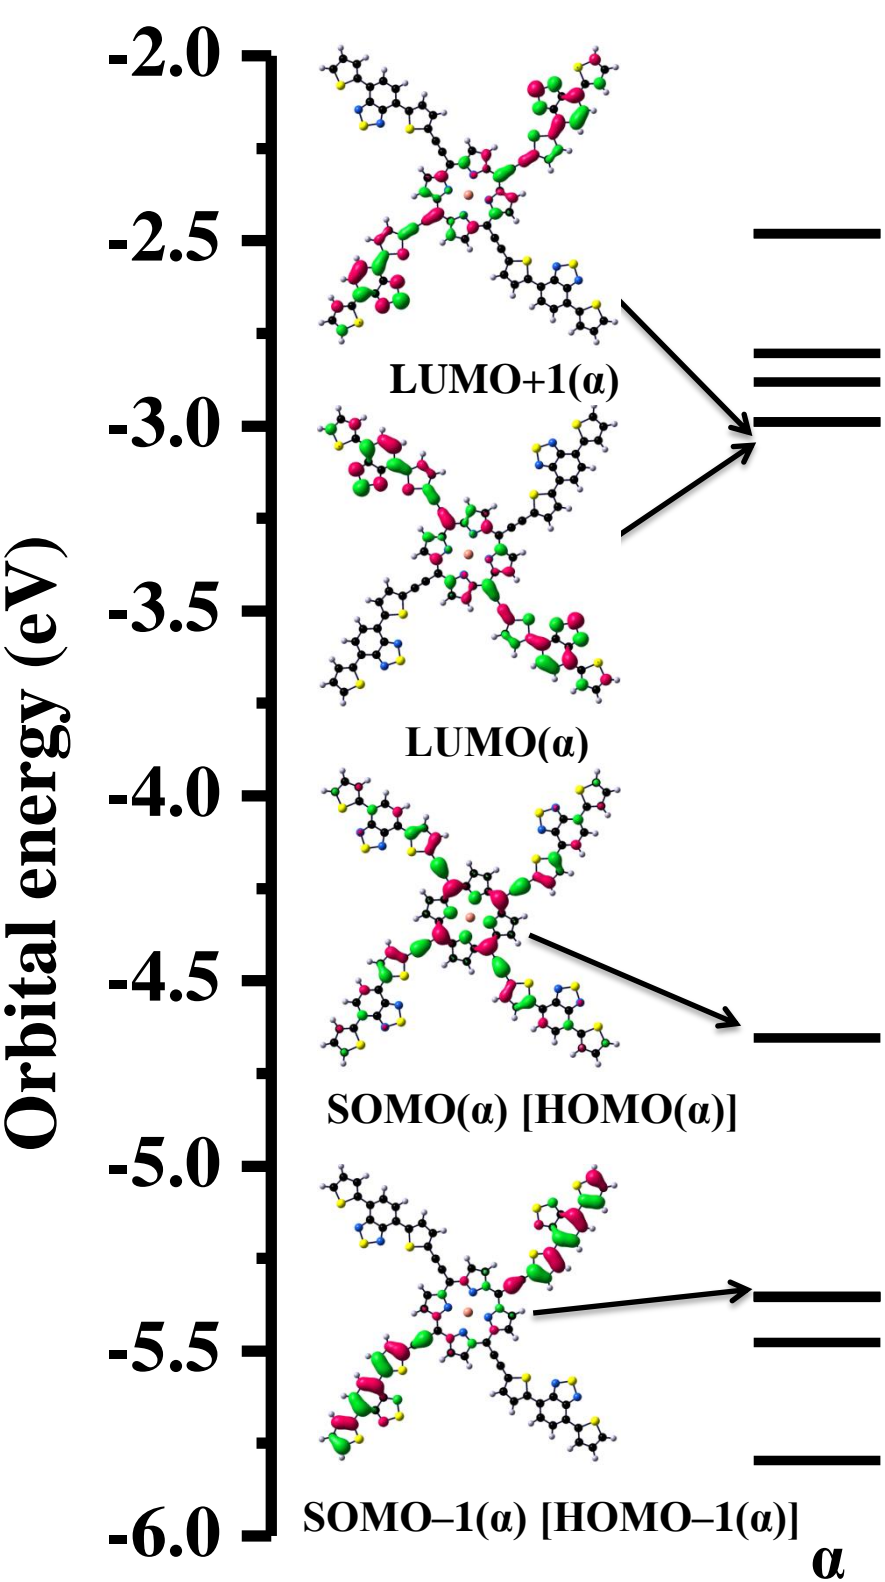

(c)

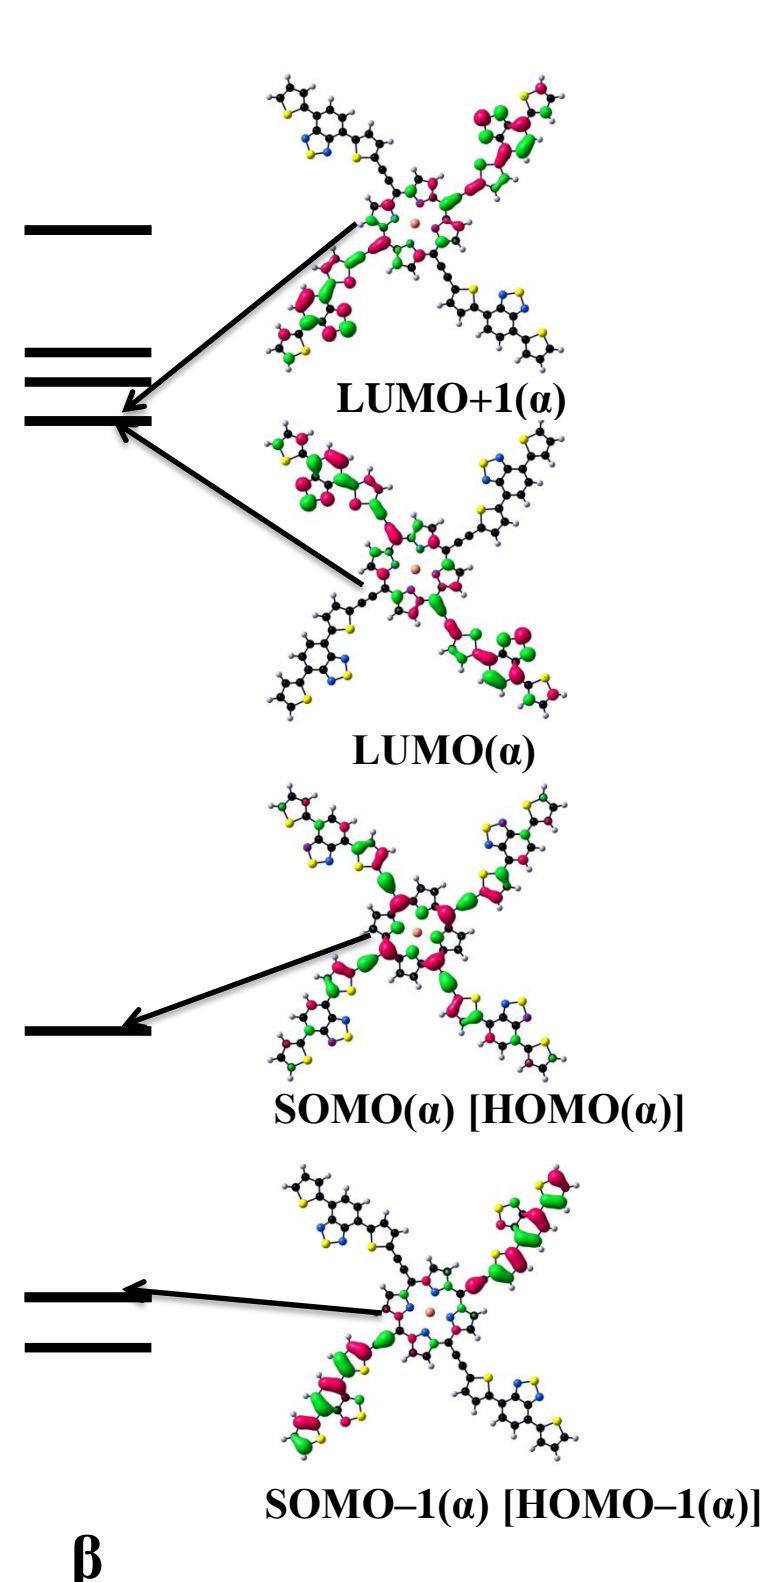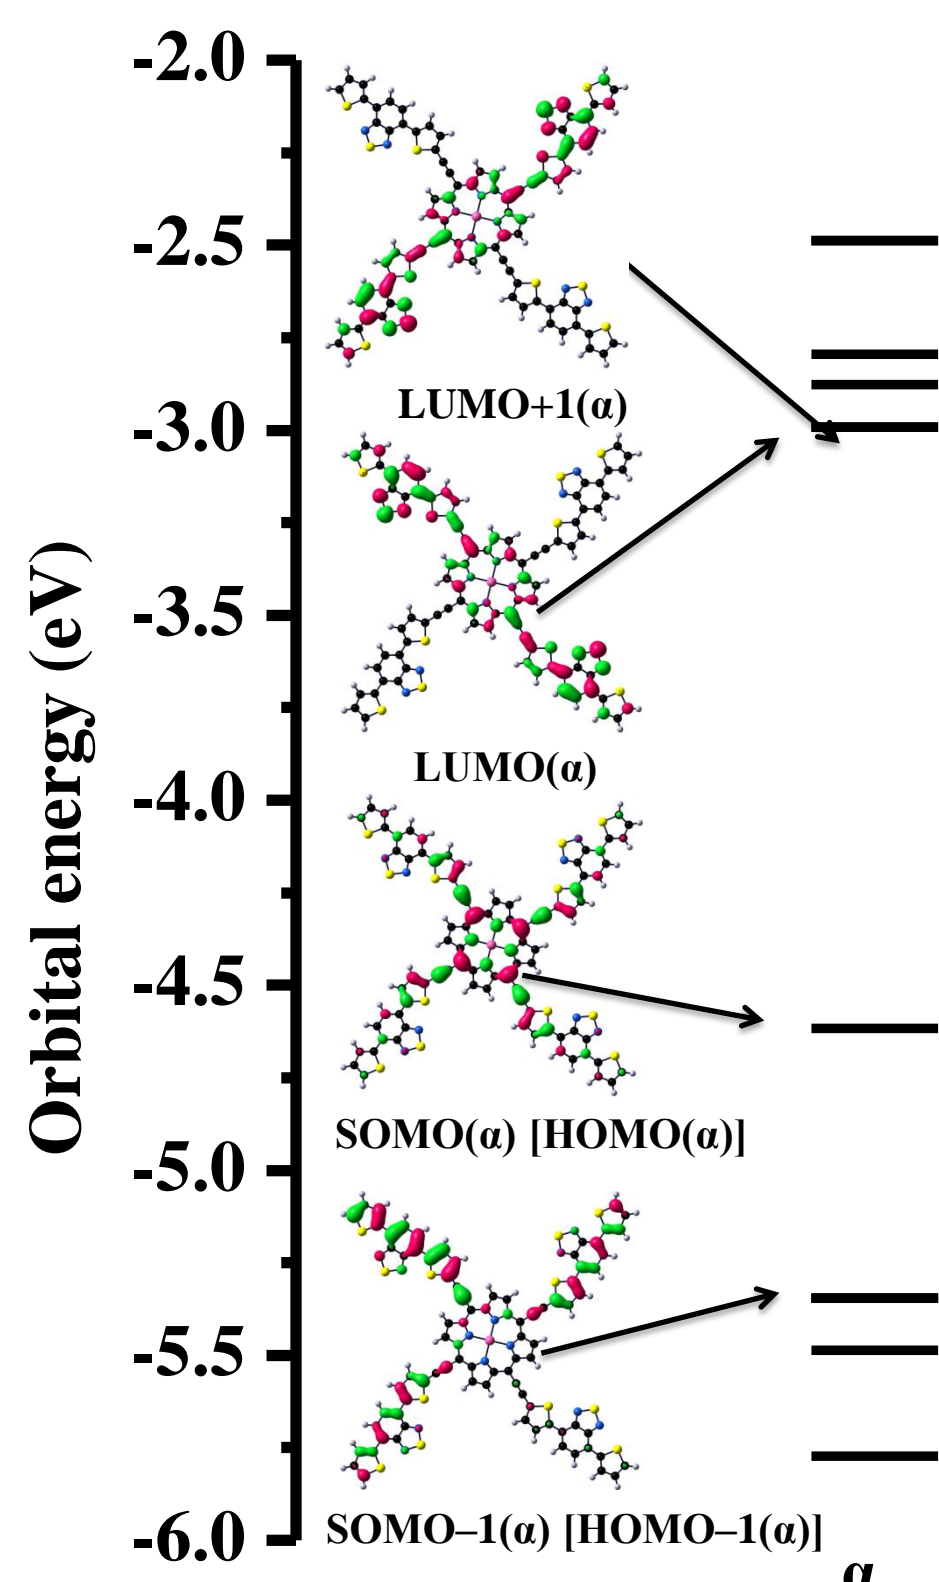

(d)

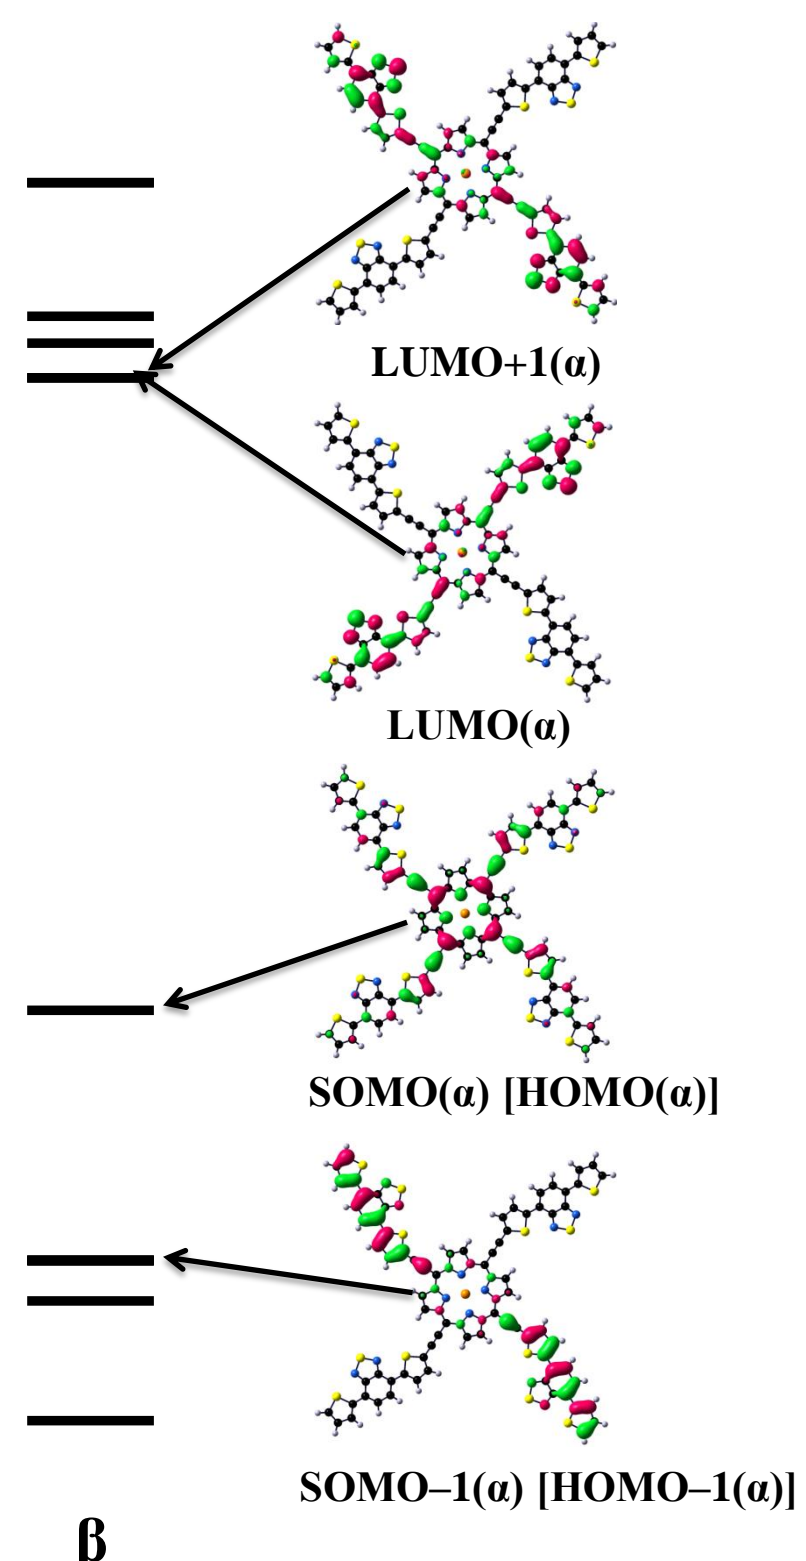

Supplement: d0cp03279d2.zip [file d0cp03279d2.zip]
